# Supplementary material for: pathfindR: An R Package for Comprehensive Identification of Enriched Pathways in Omics Data Through Active Subnetworks
Source: Front Genet. 2019 Sep 25;10:858. doi: 10.3389/fgene.2019.00858 (PMC6773876; doi:10.3389/fgene.2019.00858)
Supplement: Supplementary Datasheet 2 — The unfiltered results of enrichment analyses using all the different methods on each of the datasets. [file DataSheet_2.xlsx]

## Sheet: Tab Legends
#	Tab Name	Description
1	RA - pathfindR	pathfindR analysis results on the Rheumatoid Arthritis dataset
2	RA - DAVID	DAVID analysis results on the Rheumatoid Arthritis dataset
3	RA - SPIA	SPIA results on the Rheumatoid Arthritis dataset
4	RA - GSEA	GSEA results on the Rheumatoid Arthritis dataset
5	RA - GSEAPreranked	Preranked GSEA results on the Rheumatoid Arthritis dataset
6	CRC - pathfindR	pathfindR analysis results on the Colorectal Cancer dataset
7	CRC - DAVID	DAVID analysis results on the Colorectal Cancer dataset
8	CRC - SPIA	SPIA results on the Colorectal Cancer dataset
9	CRC - GSEA	GSEA results on the Colorectal Cancer dataset
10	CRC - GSEAPreranked	Preranked GSEA results on the Colorectal Cancer dataset
11	PCa - pathfindR	pathfindR analysis results on the Prostate Cancer dataset
12	PCa - DAVID	DAVID analysis results on the Prostate Cancer dataset
13	PCa - SPIA	SPIA results on the Prostate Cancer dataset
14	PCa - GSEA	GSEA results on the Prostate Cancer dataset
15	PCa - GSEAPreranked	Preranked GSEA results on the Prostate Cancer dataset

## Sheet: RA - pathfindR
ID	Pathway	Fold_Enrichment	occurrence	lowest_p	highest_p	Up_regulated	Down_regulated
hsa00190	Oxidative phosphorylation	2.52036	10	2.6283e-07	2.6283e-07	NDUFA1, NDUFB3, UQCRQ, COX6A1, COX7A2, COX7C, ATP6V1D, ATP6V0E1	ATP6V0E2
hsa05012	Parkinson disease	2.23503	10	3.90725e-07	3.90725e-07	NDUFA1, NDUFB3, UQCRQ, COX6A1, COX7A2, COX7C	UBE2G1, VDAC1, SLC25A5
hsa03040	Spliceosome	2.90183	10	4.77707e-07	4.77707e-07	SF3B6, LSM3, BUD31	SNRPB, SF3B2, U2AF2, PUF60, SNU13, DDX23, EIF4A3, HNRNPA1, PCBP1, SRSF8, SRSF5
hsa04932	Non-alcoholic fatty liver disease (NAFLD)	1.78131	10	5.22653e-07	5.22653e-07	DDIT3, NDUFA1, NDUFB3, UQCRQ, COX6A1, COX7A2, COX7C	IKBKB, FASLG
hsa05010	Alzheimer disease	2.1609	10	1.19917e-06	1.19917e-06	GAPDH, RTN3, NDUFA1, NDUFB3, UQCRQ, COX6A1, COX7A2, COX7C	CALM3, CALM1, ATP2A2
hsa03013	RNA transport	2.1636	10	2.07828e-06	7.68051e-05	NUP214	NUP62, NUP93, RANGAP1, UBE2I, SUMO3, GEMIN4, EIF2S3, EIF2B1, EIF4A3, RNPS1, SRRM1
hsa05016	Huntington disease	2.26628	10	2.48156e-06	2.48156e-06	AP2B1, NDUFA1, NDUFB3, UQCRQ, COX6A1, COX7A2, COX7C	SIN3A, HDAC1, TAF4, CREB1, VDAC1, SLC25A5
hsa04064	NF-kappa B signaling pathway	2.33989	10	2.54073e-06	2.54073e-06	LY96	PRKCQ, CARD11, TICAM1, IKBKB, UBE2I, CSNK2A2, PARP1
hsa03010	Ribosome	1.47413	10	6.35463e-06	6.35463e-06	MRPS18C, RPS24, MRPL33, RPL26, RPL31, RPL39	RPLP2
hsa04714	Thermogenesis	2.14263	10	6.90739e-06	6.90739e-06	NDUFA1, NDUFB3, UQCRQ, COX6A1, COX7A2, COX7C	ADCY7, CREB1, KDM1A, SMARCA4, ACTB, ACTG1, ARID1A, MTOR
hsa05130	Pathogenic Escherichia coli infection	3.41234	10	1.51387e-05	1.83773e-05	TLR5, LY96	TUBB, ACTB, ACTG1, ABL1, ITGB1
hsa04659	Th17 cell differentiation	2.36914	10	1.72863e-05	1.72863e-05		MTOR, JAK1, HLA-DPA1, NFATC3, PRKCQ, IKBKB, GATA3, IL27RA, IL2RB
hsa04921	Oxytocin signaling pathway	2.17552	10	2.71162e-05	2.71162e-05	MYL6B, MYL6	EEF2K, EEF2, CALM3, CALM1, NFATC3, ACTB, ACTG1, ADCY7
hsa04722	Neurotrophin signaling pathway	2.07819	10	4.13564e-05	0.0350823		SH2B3, CRKL, FASLG, CALM3, CALM1, ABL1, MAGED1, IRAK2, IKBKB
hsa04130	SNARE interactions in vesicular transport	4.11308	10	6.68563e-05	6.68563e-05	STX6, STX10	STX2, BET1L, SNAP23
hsa04920	Adipocytokine signaling pathway	1.27373	10	6.9857e-05	6.9857e-05		MTOR, IKBKB, PRKCQ
hsa05167	Kaposi sarcoma-associated herpesvirus infection	1.5216	10	7.8588e-05	7.8588e-05		TICAM1, JAK1, ZFP36, IKBKB, GNB1, MTOR, CALM3, CALM1, NFATC3, CREB1
hsa04630	JAK-STAT signaling pathway	1.12016	10	0.000137653	0.000137653		IL2RB, IL10RA, IL27RA, JAK1, PIAS3, MTOR
hsa04931	Insulin resistance	1.08552	10	0.000145538	0.000145538		MTOR, IKBKB, PRKCQ, CREB1
hsa04260	Cardiac muscle contraction	2.23083	10	0.000165166	0.000165166	UQCRQ, COX6A1, COX7A2, COX7C	ATP2A2
hsa05142	Chagas disease (American trypanosomiasis)	1.10837	10	0.00022685	0.00022685	TLR6	TICAM1, IKBKB, FASLG
hsa05100	Bacterial invasion of epithelial cells	1.77863	10	0.000229521	0.0173478		CRKL, ACTB, ACTG1, SEPT9, ITGB1
hsa05163	Human cytomegalovirus infection	1.53342	10	0.000240738	0.000240738		MTOR, IKBKB, GNB1, CALM3, CALM1, NFATC3, ADCY7, JAK1, CREB1, CRKL, IL10RA, FASLG
hsa04660	T cell receptor signaling pathway	1.38546	10	0.000325325	0.000325325		LCP2, NFATC3, PRKCQ, CARD11, IKBKB
hsa05131	Shigellosis	3.02076	10	0.000332077	0.000332077		ITGB1, ABL1, CRKL, ACTB, ACTG1, PFN1, IKBKB
hsa05203	Viral carcinogenesis	1.17648	10	0.000400645	0.000400645	GTF2B	CREB1, JAK1, SCRIB, RBL2, HDAC1, DNAJA3, SRF
hsa04530	Tight junction	1.60077	10	0.000485063	0.0761455	MYL6B, MYL6	ARHGAP17, SCRIB, TJAP1, SLC9A3R1, ACTB, ACTG1, ITGB1
hsa05166	Human T-cell leukemia virus 1 infection	1.79225	10	0.000568947	0.000568947	POLE4	TRRAP, NFATC3, IL2RB, JAK1, VDAC1, SLC25A5, ANAPC1, POLD2, IKBKB, ZFP36, HLA-DPA1, SRF, ETS1, ADCY7, CREB1
hsa04210	Apoptosis	1.43958	10	0.000718345	0.000718345	DDIT3	FASLG, ACTB, ACTG1, PARP1, DFFB, IKBKB
hsa05165	Human papillomavirus infection	1.40393	10	0.000856006	0.000856006	PPP2R3C, ATP6V1D, ATP6V0E1	TICAM1, SCRIB, ITGB1, FASLG, SLC9A3R1, MTOR, RBL2, IKBKB, HDAC1, IRF1, ATP6V0E2, CREB1, JAK1
hsa05161	Hepatitis B	1.33526	10	0.000902345	0.000902345	MMP9	FASLG, IKBKB, NFATC3, JAK1, CREB1, TICAM1
hsa04150	mTOR signaling pathway	1.36493	10	0.00106174	0.00106174	ATP6V1D, RRAGD	MTOR, TELO2, WDR59, IKBKB, LPIN1
hsa05418	Fluid shear stress and atherosclerosis	2.00945	10	0.0011669	0.0011669	GSTO1, TXN, MMP9	CALM3, CALM1, KLF2, ACTB, ACTG1, IKBKB, SUMO3
hsa04218	Cellular senescence	1.38546	10	0.00135101	0.00169153		RBL2, MTOR, ETS1, CALM3, CALM1, NFATC3, SLC25A5, VDAC1
hsa04217	Necroptosis	1.32566	10	0.00144216	0.00144216	H2AFJ	SLC25A5, VDAC1, FASLG, JAK1, TICAM1, PARP1
hsa04145	Phagosome	2.12913	10	0.00166532	0.00166532	ATP6V1D, ATP6V0E1, TLR6, NCF4	ACTB, ACTG1, HLA-DPA1, ATP6V0E2, DYNC1H1, TUBB, ITGB1
hsa04710	Circadian rhythm	2.63237	10	0.00184072	0.233033		CRY1, BHLHE40, CREB1
hsa03050	Proteasome	1.22436	10	0.00188132	0.00188132		PSMD7, PSMB10
hsa05168	Herpes simplex infection	1.67376	10	0.00244241	0.00244241	SRPK1	IKBKB, TICAM1, SRSF8, SRSF5, CSNK2A2, TAF4, HLA-DPA1, CD74, JAK1, FASLG
hsa05200	Pathways in cancer	1.06189	10	0.00246366	0.00728868	MMP9, GSTO1	ADCY7, GNB1, ITGB1, IKBKB, MTOR, ABL1, CRKL, IL2RB, JAK1, ETS1, TFG, CALM3, CALM1, RALGDS, HDAC1, MLH1, FASLG
hsa04621	NOD-like receptor signaling pathway	1.06718	10	0.00247718	0.00247718	CAMP, TXN	IKBKB, VDAC1, JAK1, TICAM1
hsa05202	Transcriptional misregulation in cancer	1.43584	10	0.00249512	0.013092	MMP9, DDIT3	HDAC1, SIN3A, BCL11B, EWSR1, IL2RB, TAF15, ASPSCR1
hsa04151	PI3K-Akt signaling pathway	0.919242	10	0.00331152	0.00331152	PPP2R3C	IL2RB, JAK1, ITGB1, GNB1, MTOR, CDC37, RBL2, FASLG, CREB1, IKBKB
hsa05215	Prostate cancer	1.14451	10	0.00388423	0.00388423	MMP9	CREB1, IKBKB, MTOR
hsa05170	Human immunodeficiency virus 1 infection	1.23393	10	0.00418567	0.00418567		CRKL, MTOR, CALM3, CALM1, NFATC3, GNB1, CFL1, IKBKB, FASLG
hsa04066	HIF-1 signaling pathway	1.43064	10	0.00438288	0.00438288	HK3, GAPDH	MTOR, PDHA1, PDHB
hsa05225	Hepatocellular carcinoma	1.21228	10	0.00478264	0.00944264	GSTO1	MTOR, ACTB, ACTG1, ARID1A, SMARCA4, BRD7
hsa04922	Glucagon signaling pathway	1.49567	10	0.0049272	0.0049272		CREB1, CALM3, CALM1, PDHA1, PDHB
hsa03420	Nucleotide excision repair	2.86128	10	0.00541806	0.00541806	GTF2H5, POLE4	XPC, RPA1, POLD2
hsa04015	Rap1 signaling pathway	1.46243	10	0.00554391	0.00554391		CALM3, CALM1, ADCY7, CRKL, LCP2, RALGDS, PFN1, ACTB, ACTG1, ITGB1
hsa05221	Acute myeloid leukemia	0.822617	10	0.00600833	0.00600833		IKBKB, MTOR
hsa05132	Salmonella infection	1.66606	10	0.00655735	0.0133137	TLR5	ACTB, ACTG1, DYNC1H1, PFN1
hsa05212	Pancreatic cancer	1.40393	10	0.00664646	0.00664646		IKBKB, RALGDS, MTOR, JAK1
hsa04662	B cell receptor signaling pathway	1.52601	10	0.00748718	0.00748718		NFATC3, CARD11, IKBKB, CD81
hsa04971	Gastric acid secretion	1.94991	10	0.00882929	0.00882929		CALM3, CALM1, ADCY7, ACTB
hsa04020	Calcium signaling pathway	1.2708	2	0.00930465	0.00930465		ADCY7, ATP2A2, STIM2, VDAC1, SLC25A5, CALM3, CALM1
hsa04919	Thyroid hormone signaling pathway	1.69052	10	0.00947827	0.0327597		SIN3A, HDAC1, MED24, MTOR, ACTB, ACTG1, ATP2A2
hsa05220	Chronic myeloid leukemia	1.38546	10	0.0118996	0.0118996		ABL1, CRKL, IKBKB, HDAC1
hsa04728	Dopaminergic synapse	1.30531	10	0.0127017	0.0127017	PPP2R3C	CALM3, CALM1, CREB1, GNB1, COMT
hsa05412	Arrhythmogenic right ventricular cardiomyopathy (ARVC)	1.81543	10	0.0128294	0.0128294		ITGB1, ACTB, ACTG1, ATP2A2
hsa04371	Apelin signaling pathway	1.53555	10	0.0151347	0.0151347		ADCY7, GNB1, CALM3, CALM1, MTOR, PIK3R4, KLF2
hsa04910	Insulin signaling pathway	1.26354	10	0.0151347	0.0151347	HK3	CALM3, CALM1, CRKL, MTOR, IKBKB
hsa03015	mRNA surveillance pathway	1.92613	10	0.0157678	0.0157678	PPP2R3C	EIF4A3, RNPS1, SRRM1, WDR33, DAZAP1
hsa04658	Th1 and Th2 cell differentiation	2.47753	10	0.0162918	0.0162918		JAK1, RUNX3, HLA-DPA1, NFATC3, PRKCQ, IKBKB, IL2RB, GATA3
hsa04620	Toll-like receptor signaling pathway	1.43064	10	0.017712	0.017712	TLR6, LY96, TLR5	IKBKB, TICAM1
hsa05410	Hypertrophic cardiomyopathy (HCM)	1.50421	10	0.0196426	0.0196426		ITGB1, ACTB, ACTG1, ATP2A2
hsa04668	TNF signaling pathway	1.24169	10	0.0209396	0.0209396	BAG4, MMP9	IKBKB, CREB1, IRF1
hsa05110	Vibrio cholerae infection	4.38729	10	0.0211352	0.237084	ATP6V1D, ATP6V0E1	ATP6V0E2, PDIA4, ARF1, ACTB, ACTG1
hsa05169	Epstein-Barr virus infection	0.964744	10	0.0229257	0.0229257		HLA-DPA1, IKBKB, JAK1, PSMD7, SIN3A, HDAC1, RUNX3
hsa05031	Amphetamine addiction	1.72615	10	0.0239018	0.0239018		CALM3, CALM1, CREB1, HDAC1
hsa05414	Dilated cardiomyopathy (DCM)	1.82804	10	0.0250161	0.0250161		ITGB1, ACTB, ACTG1, ADCY7, ATP2A2
hsa04012	ErbB signaling pathway	0.974953	10	0.0262538	0.0262538		CRKL, ABL1, MTOR
hsa04510	Focal adhesion	0.591545	10	0.0280513	0.0280513		ITGB1, ACTB, ACTG1, CRKL
hsa04110	Cell cycle	1.07884	10	0.0299165	0.0299165		RBL2, ABL1, HDAC1, CDKN1C, ANAPC1
hsa05206	MicroRNAs in cancer	1.47266	10	0.0302623	0.0353258	MMP9	CRKL, MTOR, ABL1, DNMT1, UBE2I, IKBKB, HDAC1
hsa03460	Fanconi anemia pathway	1.61166	10	0.0330942	0.0330942		TELO2, MLH1, RPA1
hsa05160	Hepatitis C	1.11541	10	0.035219	0.035219		CD81, TICAM1, IKBKB, IRF1, JAK1
hsa04721	Synaptic vesicle cycle	2.39307	10	0.0354429	0.0354429	AP2B1, ATP6V1D, ATP6V0E1	STX2, ATP6V0E2
hsa04810	Regulation of actin cytoskeleton	0.831276	10	0.0364965	0.0364965		ITGB1, CRKL, ACTB, ACTG1, PFN1, CFL1
hsa04270	Vascular smooth muscle contraction	2.07041	10	0.0368626	0.0368626	MYL6B, MYL6	CALM3, CALM1, PRKCH, PRKCQ, ADCY7
hsa05230	Central carbon metabolism in cancer	1.75492	10	0.0389095	0.0389095	HK3	PDHA1, PDHB, MTOR
hsa04120	Ubiquitin mediated proteolysis	1.18754	10	0.0402248	0.0532659	TRIP12	UBE2G1, UBE2I, HERC1, PIAS3, ANAPC1
hsa05214	Glioma	1.16134	10	0.0506163	0.0506163		CALM3, CALM1, MTOR
hsa04520	Adherens junction	1.19653	10	0.0527656	0.0527656		ACTB, ACTG1, CSNK2A2
hsa05416	Viral myocarditis	1.9867	10	0.0545376	0.0609073		ABL1, ACTB, ACTG1, HLA-DPA1
hsa04657	IL-17 signaling pathway	1.33285	10	0.0607105	0.0607105	S100A8, S100A9, MMP9	IKBKB
hsa04390	Hippo signaling pathway	0.779963	10	0.0636365	0.10817		SCRIB, SMAD7, ACTB, ACTG1
hsa03430	Mismatch repair	3.43353	10	0.0682175	0.0682175		MLH1, RPA1, POLD2
hsa04141	Protein processing in endoplasmic reticulum	1.09682	3	0.0697283	0.0697283	CKAP4, DDIT3	DDOST, EDEM1, PDIA4, UBE2G1
hsa04744	Phototransduction	5.26475	10	0.0738943	0.0738943		GNB1, CALM3, CALM1
hsa05164	Influenza A	1.34134	10	0.0774733	0.0774733		IKBKB, TICAM1, JAK1, HLA-DPA1, FASLG, VDAC1, ACTB, ACTG1
hsa04625	C-type lectin receptor signaling pathway	1.41525	10	0.0844787	0.0844787		CALM3, CALM1, NFATC3, IKBKB, IRF1
hsa00670	One carbon pool by folate	3.29047	6	0.0859937	0.0859937		SHMT1, ATIC
hsa04350	TGF-beta signaling pathway	0.721198	3	0.0954243	0.0954243		SMAD7, TGIF2
hsa05162	Measles	1.27373	10	0.0967453	0.0967453		PRKCQ, IL2RB, JAK1, CSNK2A2, RAB9A, FASLG
hsa04211	Longevity regulating pathway	0.963064	10	0.0988251	0.0988251		ADCY7, CREB1, MTOR
hsa04152	AMPK signaling pathway	1.18575	10	0.107884	0.107884	PPP2R3C	CREB1, EEF2K, EEF2, MTOR
hsa04014	Ras signaling pathway	1.32948	10	0.115401	0.115401		GNB1, CALM3, CALM1, RASA3, RASAL3, IKBKB, FASLG, ETS1, RALGDS, ABL1
hsa05133	Pertussis	2.67052	1	0.115499	0.115499	LY96	ITGB1, CALM3, CALM1, CFL1, TICAM1, IRF1
hsa04713	Circadian entrainment	1.64523	10	0.123492	0.123492		CALM3, CALM1, CREB1, GNB1, ADCY7
hsa03410	Base excision repair	3.98845	10	0.141591	0.141591	POLE4	MUTYH, APEX2, POLD2, PARP1
hsa04068	FoxO signaling pathway	1.03637	10	0.14269	0.14269		IKBKB, RBL2, FASLG, KLF2, S1PR1
hsa04380	Osteoclast differentiation	1.12495	10	0.151941	0.151941	NCF4	IKBKB, LCP2, CREB1, JAK1
hsa04136	Autophagy - other	2.72315	10	0.153347	0.153347	IGBP1	MTOR, PIK3R4
hsa03022	Basal transcription factors	2.92486	10	0.160347	0.160347	GTF2B, GTF2H5	TAF1L, TAF4, TAF15
hsa04930	Type II diabetes mellitus	1.7948	10	0.167566	0.167566	HK3	MTOR, IKBKB
hsa04022	cGMP-PKG signaling pathway	1.78131	2	0.179503	0.179503		NFATC3, SRF, ATP2A2, CALM3, CALM1, ADCY7, VDAC1, SLC25A5, CREB1
hsa04725	Cholinergic synapse	0.822617	10	0.193949	0.193949		GNB1, ADCY7, CREB1
hsa00630	Glyoxylate and dicarboxylate metabolism	2.1059	6	0.195451	0.195451		MDH2, SHMT1
hsa00270	Cysteine and methionine metabolism	3.94856	10	0.209501	0.209501		MAT2B, MRI1, DNMT1, AHCYL2, GOT1, MDH2
hsa04962	Vasopressin-regulated water reabsorption	1.31619	10	0.216553	0.216553		CREB1, DYNC1H1
hsa04261	Adrenergic signaling in cardiomyocytes	1.31619	10	0.219229	0.219229	PPP2R3C	ADCY7, CALM3, CALM1, CREB1, ATP2A2
hsa04144	Endocytosis	0.833784	7	0.219563	0.219563	AP2B1, VPS25, ASAP1	IST1, IL2RB, RAB11FIP3, ARF1
hsa05205	Proteoglycans in cancer	0.853743	1	0.229568	0.229568	MMP9	ACTB, ACTG1, MTOR, FASLG, ITGB1
hsa05034	Alcoholism	1.16134	10	0.239627	0.239627	H2AFJ	HDAC1, GNB1, CREB1, CALM3, CALM1

## Sheet: RA - DAVID
Category	Term	Count	%	PValue	Genes	List Total	Pop Hits	Pop Total	Fold Enrichment	Bonferroni	Benjamini	FDR
KEGG_PATHWAY	hsa03040:Spliceosome	14	2.44755	0.000854827	U2AF2, SNU13, SF3B6, BUD31, HNRNPA1, SF3B2, EIF4A3, SRSF5, DDX23, PCBP1, SRSF8, SNRPB, LSM3, PUF60	247	133	6910	2.94481	0.191106	0.191106	1.10344
KEGG_PATHWAY	hsa00190:Oxidative phosphorylation	13	2.27273	0.00266332	NDUFB3, ATP5E, ATP6V0E1, ATP6V0E2, COX7A2, COX7C, COX6A1, ATP5G2, ATP5I, UQCRQ, NDUFA1, ATP6V1D, ATP5J	247	133	6910	2.73447	0.483864	0.281574	3.40096
KEGG_PATHWAY	hsa05016:Huntington's disease	16	2.7972	0.00340088	NDUFB3, ATP5E, TAF4, COX7A2, SLC25A5, CREB1, COX7C, ATP5G2, UQCRQ, NDUFA1, VDAC1, AP2B1, SIN3A, HDAC1, COX6A1, ATP5J	247	192	6910	2.33131	0.570381	0.245439	4.32375
KEGG_PATHWAY	hsa05130:Pathogenic Escherichia coli infection	7	1.22378	0.00901419	ACTB, ACTG1, TUBB, LY96, TLR5, ABL1, ITGB1	247	51	6910	3.8398	0.894142	0.429598	11.0846
KEGG_PATHWAY	hsa00270:Cysteine and methionine metabolism	6	1.04895	0.0105494	MRI1, GOT1, DNMT1, MAT2B, AHCYL2, MDH2	247	38	6910	4.41722	0.927932	0.409053	12.8553
KEGG_PATHWAY	hsa05110:Vibrio cholerae infection	7	1.22378	0.0108347	ACTB, ACTG1, ATP6V0E1, ATP6V0E2, ARF1, PDIA4, ATP6V1D	247	53	6910	3.6949	0.932907	0.362549	13.1808
KEGG_PATHWAY	hsa05012:Parkinson's disease	12	2.0979	0.0121724	NDUFB3, ATP5E, COX7A2, SLC25A5, UBE2G1, COX7C, COX6A1, ATP5G2, UQCRQ, NDUFA1, VDAC1, ATP5J	247	142	6910	2.36414	0.952034	0.35202	14.6918
KEGG_PATHWAY	hsa05010:Alzheimer's disease	13	2.27273	0.016443	NDUFB3, ATP5E, COX7A2, COX7C, ATP5G2, NDUFA1, UQCRQ, ATP2A2, COX6A1, CALM3, GAPDH, ATP5J, CALM1	247	168	6910	2.16479	0.983621	0.401883	19.355
KEGG_PATHWAY	hsa05131:Shigellosis	7	1.22378	0.0256496	ACTB, ACTG1, PFN1, CRKL, IKBKB, ABL1, ITGB1	247	64	6910	3.05984	0.99841	0.511303	28.6187
KEGG_PATHWAY	hsa03410:Base excision repair	5	0.874126	0.0285275	MUTYH, POLE4, APEX2, POLD2, PARP1	247	33	6910	4.23874	0.999237	0.512161	31.3063
KEGG_PATHWAY	hsa04130:SNARE interactions in vesicular transport	5	0.874126	0.0314563	STX6, STX2, BET1L, SNAP23, STX10	247	34	6910	4.11407	0.999639	0.513535	33.9454
KEGG_PATHWAY	hsa00330:Arginine and proline metabolism	6	1.04895	0.0316163	ARG1, PYCR2, GOT1, CNDP2, ALDH9A1, CKB	247	50	6910	3.35709	0.999653	0.485189	34.0868
KEGG_PATHWAY	hsa01100:Metabolic pathways	56	9.79021	0.0362358	ATP5E, ATP6V0E1, CNDP2, UQCRQ, ALG9, PDHB, CKB, GOT1, XYLT2, PDHA1, HADH, ATP5I, DDOST, AGPAT2, HMGCL, ATP5J, MRI1, QDPR, PDXP, CECR1, PIGT, ATP6V1D, LPIN1, PYCR2, DGAT1, MDH2, ALDH9A1, NDUFB3, GNE, GALNT4, DCK, COX7C, ECHS1, ATP5G2, COMT, ADA, ARG1, POLE4, ATIC, HK3, PAFAH1B1, GAPDH, AGK, DCTD, SHMT1, ST6GAL1, GMDS, NDUFA1, ATP6V0E2, POLD2, MBOAT2, DNMT1, COX6A1, MAT2B, AHCYL2, ALG13	247	1228	6910	1.27577	0.999894	0.505448	38.0519
KEGG_PATHWAY	hsa01130:Biosynthesis of antibiotics	14	2.44755	0.0389247	SHMT1, ECHS1, PDHB, ARG1, PYCR2, FNTA, GOT1, ATIC, HK3, PDHA1, HADH, GAPDH, MDH2, ALDH9A1	247	212	6910	1.84745	0.999947	0.505051	40.2572
KEGG_PATHWAY	hsa05166:HTLV-I infection	16	2.7972	0.0396761	ZFP36, ANAPC1, IL2RB, ADCY7, SLC25A5, CREB1, TRRAP, SRF, VDAC1, POLE4, ETS1, POLD2, JAK1, HLA-DPA1, IKBKB, NFATC3	247	256	6910	1.74848	0.999956	0.487957	40.8605
KEGG_PATHWAY	hsa03013:RNA transport	12	2.0979	0.0427035	SUMO3, EIF4A3, NUP214, NUP62, NUP93, SRRM1, EIF2S3, RANGAP1, RNPS1, UBE2I, EIF2B1, GEMIN4	247	172	6910	1.95179	0.99998	0.491582	43.2342
KEGG_PATHWAY	hsa04145:Phagosome	11	1.92308	0.0459362	ACTB, ACTG1, TUBB, ATP6V0E1, ATP6V0E2, NCF4, HLA-DPA1, TLR6, DYNC1H1, ITGB1, ATP6V1D	247	153	6910	2.01133	0.999991	0.496417	45.6716
KEGG_PATHWAY	hsa05133:Pertussis	7	1.22378	0.0500815	LY96, CFL1, TICAM1, IRF1, CALM3, ITGB1, CALM1	247	75	6910	2.61107	0.999997	0.507317	48.6559
KEGG_PATHWAY	hsa00561:Glycerolipid metabolism	6	1.04895	0.0545469	DGAT1, MBOAT2, LPIN1, AGK, AGPAT2, ALDH9A1	247	58	6910	2.89404	0.999999	0.519119	51.7008
KEGG_PATHWAY	hsa04722:Neurotrophin signaling pathway	9	1.57343	0.0637631	MAGED1, IRAK2, CRKL, SH2B3, CALM3, FASLG, IKBKB, ABL1, CALM1	247	120	6910	2.09818	1	0.558243	57.4653
KEGG_PATHWAY	hsa03022:Basal transcription factors	5	0.874126	0.0749307	TAF4, TAF15, GTF2H5, GTF2B, TAF1L	247	45	6910	3.10841	1	0.601403	63.5979
KEGG_PATHWAY	hsa03420:Nucleotide excision repair	5	0.874126	0.0849967	RPA1, POLE4, XPC, POLD2, GTF2H5	247	47	6910	2.97614	1	0.632609	68.4153
KEGG_PATHWAY	hsa04064:NF-kappa B signaling pathway	7	1.22378	0.0890192	CSNK2A2, CARD11, PRKCQ, LY96, TICAM1, UBE2I, IKBKB	247	87	6910	2.25092	1	0.634065	70.1702

## Sheet: RA - SPIA
Name	ID	pSize	NDE	pNDE	tA	pPERT	pG	pGFdr	pGFWER	Status	KEGGLINK
Parkinson's disease	5012	116	12	0.000153434	-1.63402	0.248	0.000425287	0.0328753	0.0531609	Inhibited	http://www.genome.jp/dbget-bin/show_pathway?hsa05012+4694+4709+27089+1337+1347+1350+514+517+522+292+7416+7326
Huntington's disease	5016	172	16	4.80681e-05	0	1	0.000526004	0.0328753	0.0657505	Inhibited	http://www.genome.jp/dbget-bin/show_pathway?hsa05016+4694+4709+27089+1337+1347+1350+514+517+522+25942+3065+292+7416+6874+163+1385
Vascular smooth muscle contraction	4270	113	7	0.0484791	-5.21139	0.004	0.00185153	0.0705242	0.231441	Inhibited	http://www.genome.jp/dbget-bin/show_pathway?hsa04270+140465+4637+5583+5588+801+808+113
Alzheimer's disease	5010	160	13	0.0008831	-1.1457	0.274	0.00225678	0.0705242	0.282097	Inhibited	http://www.genome.jp/dbget-bin/show_pathway?hsa05010+4694+4709+27089+514+517+522+1337+1347+1350+488+801+808+2597
RNA transport	3013	144	12	0.00110521	-0.350202	0.328	0.00323448	0.0808621	0.404311	Inhibited	http://www.genome.jp/dbget-bin/show_pathway?hsa03013+50628+9775+10921+10250+23636+9688+8021+7329+5905+6612+1968+1967
Pathogenic Escherichia coli infection	5130	51	7	0.000675388	0.301482	0.875	0.00498405	0.103834	0.623007	Activated	http://www.genome.jp/dbget-bin/show_pathway?hsa05130+23643+7100+25+3688+7280+60+71
Vibrio cholerae infection	5110	52	7	0.00076104	0.173586	0.935	0.00586907	0.104805	0.733634	Activated	http://www.genome.jp/dbget-bin/show_pathway?hsa05110+375+155066+51382+8992+60+71+9601
Shigellosis	5131	60	7	0.00179686	0.436381	0.712	0.00980169	0.137642	1	Activated	http://www.genome.jp/dbget-bin/show_pathway?hsa05131+1399+25+3551+5216+60+71+3688
HTLV-I infection	5166	259	17	0.0017184	0.713945	0.754	0.00991024	0.137642	1	Activated	http://www.genome.jp/dbget-bin/show_pathway?hsa05166+4775+3560+3716+8295+292+706+7416+113+1385+5425+56655+64682+3551+6722+2113+3113+7538
SNARE interactions in vesicular transport	4130	35	5	0.00332626	-0.148034	0.699	0.0164242	0.205303	1	Inhibited	http://www.genome.jp/dbget-bin/show_pathway?hsa04130+51272+10228+8677+8773+2054
NF-kappa B signaling pathway	4064	88	8	0.00425869	-0.797817	0.613	0.0181388	0.206122	1	Inhibited	http://www.genome.jp/dbget-bin/show_pathway?hsa04064+3551+5588+84433+148022+23643+1459+142+7329
Pertussis	5133	73	7	0.00547744	-0.0697935	0.965	0.0329975	0.331277	1	Inhibited	http://www.genome.jp/dbget-bin/show_pathway?hsa05133+3688+801+808+23643+1072+148022+3659
Neurotrophin signaling pathway	4722	120	9	0.00880492	-1.02248	0.632	0.0344529	0.331277	1	Inhibited	http://www.genome.jp/dbget-bin/show_pathway?hsa04722+1399+356+10019+25+9500+3656+3551+801+808
Alcoholism	5034	168	6	0.369954	-4.29789	0.035	0.0692322	0.539777	1	Inhibited	http://www.genome.jp/dbget-bin/show_pathway?hsa05034+1385+3065+801+808+2782+55766
Herpes simplex infection	5168	179	11	0.0166251	-0.409687	0.78	0.0693158	0.539777	1	Inhibited	http://www.genome.jp/dbget-bin/show_pathway?hsa05168+148022+6874+3716+6732+10929+6430+1459+972+3113+356+3551
Tight junction	4530	127	7	0.0799244	-1.14	0.164	0.0699233	0.539777	1	Inhibited	http://www.genome.jp/dbget-bin/show_pathway?hsa04530+5583+5588+9080+1459+60+71+93643
Tuberculosis	5152	175	10	0.0336987	-1.71949	0.413	0.0734096	0.539777	1	Inhibited	http://www.genome.jp/dbget-bin/show_pathway?hsa05152+801+808+3716+1385+10333+972+3113+3587+820+3656
Salmonella infection	5132	80	5	0.0855234	1.34026	0.251	0.103924	0.721698	1	Activated	http://www.genome.jp/dbget-bin/show_pathway?hsa05132+60+71+7100+5216+1778
Influenza A	5164	170	8	0.127239	-1.20015	0.219	0.127633	0.74338	1	Inhibited	http://www.genome.jp/dbget-bin/show_pathway?hsa05164+148022+3551+3716+3113+7416+60+71+356
Pathways in cancer	5200	323	14	0.0945473	-3.51181	0.323	0.137081	0.74338	1	Inhibited	http://www.genome.jp/dbget-bin/show_pathway?hsa05200+3688+25+1399+3716+10342+3551+2475+5900+6923+4292+3065+2113+4318+356
mTOR signaling pathway	4150	63	3	0.280877	0.762552	0.115	0.143179	0.74338	1	Activated	http://www.genome.jp/dbget-bin/show_pathway?hsa04150+2475+58528+3551
Amphetamine addiction	5031	69	4	0.143729	-0.944262	0.232	0.146747	0.74338	1	Inhibited	http://www.genome.jp/dbget-bin/show_pathway?hsa05031+801+808+1385+3065
Phototransduction	4744	28	3	0.0476326	0.280628	0.768	0.157602	0.74338	1	Activated	http://www.genome.jp/dbget-bin/show_pathway?hsa04744+2782+801+808
Legionellosis	5134	54	2	0.472265	1.20494	0.085	0.169213	0.74338	1	Activated	http://www.genome.jp/dbget-bin/show_pathway?hsa05134+375+7100
Leishmaniasis	5140	69	5	0.0515668	-0.192872	0.793	0.171618	0.74338	1	Inhibited	http://www.genome.jp/dbget-bin/show_pathway?hsa05140+3688+3716+3113+65108+4689
Measles	5162	133	6	0.195737	-1.46884	0.214	0.174788	0.74338	1	Inhibited	http://www.genome.jp/dbget-bin/show_pathway?hsa05162+3716+5588+3560+356+1459+9367
Toll-like receptor signaling pathway	4620	102	5	0.179719	1.76377	0.252	0.185445	0.74338	1	Activated	http://www.genome.jp/dbget-bin/show_pathway?hsa04620+3551+23643+7100+10333+148022
Graft-versus-host disease	5332	39	2	0.317286	-0.298973	0.15	0.192517	0.74338	1	Inhibited	http://www.genome.jp/dbget-bin/show_pathway?hsa05332+3113+356
Dopaminergic synapse	4728	128	6	0.173725	-0.765967	0.281	0.196227	0.74338	1	Inhibited	http://www.genome.jp/dbget-bin/show_pathway?hsa04728+2782+1385+1312+55012+801+808
Type I diabetes mellitus	4940	42	2	0.349614	-0.298973	0.141	0.197671	0.74338	1	Inhibited	http://www.genome.jp/dbget-bin/show_pathway?hsa04940+356+3113
Colorectal cancer	5210	62	2	0.54594	-0.923334	0.095	0.205337	0.74338	1	Inhibited	http://www.genome.jp/dbget-bin/show_pathway?hsa05210+4292+5900
Gastric acid secretion	4971	75	4	0.177376	-0.70417	0.301	0.209831	0.74338	1	Inhibited	http://www.genome.jp/dbget-bin/show_pathway?hsa04971+113+60+801+808
Leukocyte transendothelial migration	4670	114	6	0.118274	1.30423	0.468	0.215543	0.74338	1	Activated	http://www.genome.jp/dbget-bin/show_pathway?hsa04670+9080+4318+3688+60+71+4689
Hepatitis C	5160	131	6	0.186808	-0.910097	0.311	0.223421	0.74338	1	Inhibited	http://www.genome.jp/dbget-bin/show_pathway?hsa05160+148022+3551+3716+975+9080+3659
Salivary secretion	4970	85	4	0.238389	-0.778243	0.256	0.231687	0.74338	1	Inhibited	http://www.genome.jp/dbget-bin/show_pathway?hsa04970+113+801+808+820
Transcriptional misregulation in cancer	5202	169	9	0.0612331	0	1	0.232261	0.74338	1	Inhibited	http://www.genome.jp/dbget-bin/show_pathway?hsa05202+2130+1649+79058+3560+85414+4318+25942+8148+3065
Glioma	5214	65	3	0.296928	-1.98805	0.207	0.232906	0.74338	1	Inhibited	http://www.genome.jp/dbget-bin/show_pathway?hsa05214+801+808+2475
Pancreatic cancer	5212	70	3	0.337212	-1.21042	0.189	0.239194	0.74338	1	Inhibited	http://www.genome.jp/dbget-bin/show_pathway?hsa05212+3551+5900+3716
Allograft rejection	5330	36	2	0.284599	-0.298973	0.232	0.245468	0.74338	1	Inhibited	http://www.genome.jp/dbget-bin/show_pathway?hsa05330+3113+356
Bacterial invasion of epithelial cells	5100	69	4	0.143729	-1.37345	0.462	0.246488	0.74338	1	Inhibited	http://www.genome.jp/dbget-bin/show_pathway?hsa05100+3688+60+71+1399
Cell cycle	4110	123	5	0.292758	-1.732	0.231	0.249798	0.74338	1	Inhibited	http://www.genome.jp/dbget-bin/show_pathway?hsa04110+64682+1028+5934+25+3065
Fanconi anemia pathway	3460	49	3	0.172844	-0.240652	0.401	0.254311	0.74338	1	Inhibited	http://www.genome.jp/dbget-bin/show_pathway?hsa03460+6117+9894+4292
Type II diabetes mellitus	4930	48	3	0.165619	0.87722	0.422	0.255859	0.74338	1	Activated	http://www.genome.jp/dbget-bin/show_pathway?hsa04930+3551+3101+2475
T cell receptor signaling pathway	4660	107	5	0.205101	-1.19072	0.357	0.264641	0.74338	1	Inhibited	http://www.genome.jp/dbget-bin/show_pathway?hsa04660+3551+84433+5588+4775+3937
Chronic myeloid leukemia	5220	73	4	0.165874	-0.749931	0.461	0.273058	0.74338	1	Inhibited	http://www.genome.jp/dbget-bin/show_pathway?hsa05220+25+3065+3551+1399
Autoimmune thyroid disease	5320	50	2	0.432823	-0.298973	0.181	0.277851	0.74338	1	Inhibited	http://www.genome.jp/dbget-bin/show_pathway?hsa05320+3113+356
Viral myocarditis	5416	69	4	0.143729	-0.347412	0.574	0.288335	0.74338	1	Inhibited	http://www.genome.jp/dbget-bin/show_pathway?hsa05416+3113+60+71+25
Epstein-Barr virus infection	5169	196	9	0.123015	-0.341104	0.674	0.289361	0.74338	1	Inhibited	http://www.genome.jp/dbget-bin/show_pathway?hsa05169+3113+2959+3065+3551+8021+1459+3587+3716+5713
Circadian rhythm - mammal	4710	22	2	0.134838	0.342524	0.621	0.291405	0.74338	1	Activated	http://www.genome.jp/dbget-bin/show_pathway?hsa04710+8553+1407
Fc gamma R-mediated phagocytosis	4666	89	4	0.264051	1.2888	0.336	0.303626	0.759066	1	Activated	http://www.genome.jp/dbget-bin/show_pathway?hsa04666+1399+1072+50807+65108
Toxoplasmosis	5145	129	6	0.178043	-0.576317	0.56	0.329577	0.807786	1	Inhibited	http://www.genome.jp/dbget-bin/show_pathway?hsa05145+3551+3716+3113+3688+23643+3587
Apoptosis	4210	87	4	0.25115	-1.1501	0.423	0.344428	0.827952	1	Inhibited	http://www.genome.jp/dbget-bin/show_pathway?hsa04210+1677+3551+3656+356
Epithelial cell signaling in Helicobacter pylori infection	5120	65	4	0.12286	0.0991739	0.931	0.362388	0.851804	1	Activated	http://www.genome.jp/dbget-bin/show_pathway?hsa05120+3551+155066+51382+8992
B cell receptor signaling pathway	4662	76	4	0.183226	-0.432244	0.64	0.368601	0.851804	1	Inhibited	http://www.genome.jp/dbget-bin/show_pathway?hsa04662+3551+84433+975+4775
Dilated cardiomyopathy	5414	89	5	0.120171	0	1	0.374794	0.851804	1	Inhibited	http://www.genome.jp/dbget-bin/show_pathway?hsa05414+488+3688+113+60+71
African trypanosomiasis	5143	33	1	0.625428	-0.298973	0.199	0.383806	0.856711	1	Inhibited	http://www.genome.jp/dbget-bin/show_pathway?hsa05143+356
NOD-like receptor signaling pathway	4621	57	2	0.500739	0.503841	0.279	0.414678	0.909381	1	Activated	http://www.genome.jp/dbget-bin/show_pathway?hsa04621+3551+55914
Renal cell carcinoma	5211	69	3	0.329152	-0.702842	0.478	0.448307	0.966178	1	Inhibited	http://www.genome.jp/dbget-bin/show_pathway?hsa05211+6923+1399+2113
Regulation of actin cytoskeleton	4810	210	6	0.58203	-1.72038	0.279	0.457569	0.966397	1	Inhibited	http://www.genome.jp/dbget-bin/show_pathway?hsa04810+5216+1072+1399+3688+60+71
Arrhythmogenic right ventricular cardiomyopathy (ARVC)	5412	73	4	0.165874	0	1	0.463871	0.966397	1	Inhibited	http://www.genome.jp/dbget-bin/show_pathway?hsa05412+488+3688+60+71
Jak-STAT signaling pathway	4630	151	4	0.649234	0.391527	0.268	0.478265	0.980051	1	Activated	http://www.genome.jp/dbget-bin/show_pathway?hsa04630+10401+3716+3560+3587
Cytosolic DNA-sensing pathway	4623	59	1	0.827409	-0.188848	0.218	0.489307	0.986506	1	Inhibited	http://www.genome.jp/dbget-bin/show_pathway?hsa04623+3551
Insulin signaling pathway	4910	137	6	0.214059	-0.142511	0.957	0.529642	0.999995	1	Inhibited	http://www.genome.jp/dbget-bin/show_pathway?hsa04910+3551+801+808+2475+3101+1399
Calcium signaling pathway	4020	181	7	0.281067	-0.40213	0.736	0.53282	0.999995	1	Inhibited	http://www.genome.jp/dbget-bin/show_pathway?hsa04020+7416+801+808+292+113+488+57620
Asthma	5310	29	2	0.208213	0	1	0.53494	0.999995	1	Inhibited	http://www.genome.jp/dbget-bin/show_pathway?hsa05310+3113+6037
Osteoclast differentiation	4380	129	5	0.327248	0.455979	0.659	0.546488	0.999995	1	Activated	http://www.genome.jp/dbget-bin/show_pathway?hsa04380+3551+3716+3937+1385+4689
Vasopressin-regulated water reabsorption	4962	42	2	0.349614	-0.339176	0.636	0.55666	0.999995	1	Inhibited	http://www.genome.jp/dbget-bin/show_pathway?hsa04962+1385+1778
MAPK signaling pathway	4010	261	7	0.646198	-0.90714	0.346	0.558507	0.999995	1	Inhibited	http://www.genome.jp/dbget-bin/show_pathway?hsa04010+1847+356+3551+1649+1399+11184+6722
Viral carcinogenesis	5203	201	8	0.237706	0	1	0.579223	0.999995	1	Inhibited	http://www.genome.jp/dbget-bin/show_pathway?hsa05203+23513+5934+1385+3716+6722+2959+9093+3065
Rheumatoid arthritis	5323	87	4	0.25115	0	1	0.598165	0.999995	1	Inhibited	http://www.genome.jp/dbget-bin/show_pathway?hsa05323+3113+155066+51382+8992
Adipocytokine signaling pathway	4920	69	3	0.329152	0.0326908	0.771	0.601781	0.999995	1	Activated	http://www.genome.jp/dbget-bin/show_pathway?hsa04920+5588+3551+2475
Fc epsilon RI signaling pathway	4664	76	1	0.89607	-0.974276	0.286	0.605196	0.999995	1	Inhibited	http://www.genome.jp/dbget-bin/show_pathway?hsa04664+3937
Oocyte meiosis	4114	111	4	0.409925	0.60414	0.633	0.609541	0.999995	1	Activated	http://www.genome.jp/dbget-bin/show_pathway?hsa04114+64682+801+808+113
Chemokine signaling pathway	4062	183	6	0.448291	-1.11547	0.599	0.621587	0.999995	1	Inhibited	http://www.genome.jp/dbget-bin/show_pathway?hsa04062+1524+2833+2782+1399+113+3551
Small cell lung cancer	5222	84	2	0.709754	-0.790387	0.39	0.632344	0.999995	1	Inhibited	http://www.genome.jp/dbget-bin/show_pathway?hsa05222+3688+3551
Prostate cancer	5215	88	3	0.478491	0.687048	0.586	0.636934	0.999995	1	Activated	http://www.genome.jp/dbget-bin/show_pathway?hsa05215+3551+1385+2475
Cocaine addiction	5030	50	1	0.774287	-0.339176	0.363	0.637786	0.999995	1	Inhibited	http://www.genome.jp/dbget-bin/show_pathway?hsa05030+1385
RNA degradation	3018	66	3	0.304975	0	1	0.66714	0.999995	1	Inhibited	http://www.genome.jp/dbget-bin/show_pathway?hsa03018+11044+27258+51691
Melanogenesis	4916	101	4	0.343324	0.178248	0.94	0.687711	0.999995	1	Activated	http://www.genome.jp/dbget-bin/show_pathway?hsa04916+801+808+1385+113
Natural killer cell mediated cytotoxicity	4650	134	3	0.756108	-1.76235	0.431	0.691268	0.999995	1	Inhibited	http://www.genome.jp/dbget-bin/show_pathway?hsa04650+4775+3937+356
Chagas disease (American trypanosomiasis)	5142	102	4	0.350001	-0.0725401	0.96	0.702458	0.999995	1	Inhibited	http://www.genome.jp/dbget-bin/show_pathway?hsa05142+148022+3551+356+10333
Protein processing in endoplasmic reticulum	4141	163	6	0.34383	0	1	0.710905	0.999995	1	Inhibited	http://www.genome.jp/dbget-bin/show_pathway?hsa04141+1649+1650+9695+7326+9601+10970
TGF-beta signaling pathway	4350	82	2	0.697183	0.553968	0.511	0.723955	0.999995	1	Activated	http://www.genome.jp/dbget-bin/show_pathway?hsa04350+4092+5934
Antigen processing and presentation	4612	73	3	0.361345	0	1	0.729166	0.999995	1	Inhibited	http://www.genome.jp/dbget-bin/show_pathway?hsa04612+972+1385+3113
Axon guidance	4360	127	4	0.512794	0.351457	0.723	0.738619	0.999995	1	Activated	http://www.genome.jp/dbget-bin/show_pathway?hsa04360+4775+3688+25+1072
GABAergic synapse	4727	87	2	0.727791	0.220551	0.512	0.740478	0.999995	1	Activated	http://www.genome.jp/dbget-bin/show_pathway?hsa04727+113+2782
Notch signaling pathway	4330	47	2	0.40223	0.0616679	0.971	0.757759	0.999995	1	Activated	http://www.genome.jp/dbget-bin/show_pathway?hsa04330+3065+4242
Long-term potentiation	4720	68	2	0.596298	-0.589201	0.655	0.757769	0.999995	1	Inhibited	http://www.genome.jp/dbget-bin/show_pathway?hsa04720+801+808
GnRH signaling pathway	4912	98	3	0.550786	-0.402853	0.716	0.761311	0.999995	1	Inhibited	http://www.genome.jp/dbget-bin/show_pathway?hsa04912+113+801+808
Retrograde endocannabinoid signaling	4723	99	3	0.557686	-0.0210048	0.714	0.764852	0.999995	1	Inhibited	http://www.genome.jp/dbget-bin/show_pathway?hsa04723+2782+747+113
Glutamatergic synapse	4724	119	2	0.867339	0.229143	0.46	0.765577	0.999995	1	Activated	http://www.genome.jp/dbget-bin/show_pathway?hsa04724+113+2782
RIG-I-like receptor signaling pathway	4622	71	2	0.619863	-0.188848	0.657	0.773094	0.999995	1	Inhibited	http://www.genome.jp/dbget-bin/show_pathway?hsa04622+3551+5300
ErbB signaling pathway	4012	85	3	0.455754	0.257285	0.907	0.778545	0.999995	1	Activated	http://www.genome.jp/dbget-bin/show_pathway?hsa04012+2475+1399+25
Lysosome	4142	119	4	0.462213	0	1	0.818916	0.999995	1	Inhibited	http://www.genome.jp/dbget-bin/show_pathway?hsa04142+2517+6556+8943+10717
Serotonergic synapse	4726	119	1	0.971246	-0.114572	0.479	0.821233	0.999995	1	Inhibited	http://www.genome.jp/dbget-bin/show_pathway?hsa04726+2782
Cholinergic synapse	4725	111	3	0.635306	0.241212	0.742	0.825914	0.999995	1	Activated	http://www.genome.jp/dbget-bin/show_pathway?hsa04725+113+2782+1385
Acute myeloid leukemia	5221	56	2	0.491357	0.0415027	0.975	0.831624	0.999995	1	Activated	http://www.genome.jp/dbget-bin/show_pathway?hsa05221+3551+2475
Focal adhesion	4510	201	4	0.843955	-0.895988	0.571	0.833695	0.999995	1	Inhibited	http://www.genome.jp/dbget-bin/show_pathway?hsa04510+3688+1399+60+71
Dorso-ventral axis formation	4320	24	1	0.510315	0	1	0.853618	0.999995	1	Inhibited	http://www.genome.jp/dbget-bin/show_pathway?hsa04320+2113
Thyroid cancer	5216	29	1	0.578044	0	1	0.894873	0.999995	1	Inhibited	http://www.genome.jp/dbget-bin/show_pathway?hsa05216+10342
VEGF signaling pathway	4370	73	2	0.634975	0.0334808	0.945	0.906522	0.999995	1	Activated	http://www.genome.jp/dbget-bin/show_pathway?hsa04370+4775+9047
Regulation of autophagy	4140	34	1	0.636419	0	1	0.924016	0.999995	1	Inhibited	http://www.genome.jp/dbget-bin/show_pathway?hsa04140+30849
Morphine addiction	5032	91	2	0.750354	-0.0210048	0.9	0.940429	0.999995	1	Inhibited	http://www.genome.jp/dbget-bin/show_pathway?hsa05032+113+2782
Phosphatidylinositol signaling system	4070	80	2	0.684164	0	1	0.943844	0.999995	1	Inhibited	http://www.genome.jp/dbget-bin/show_pathway?hsa04070+801+808
Systemic lupus erythematosus	5322	123	3	0.702918	0	1	0.950707	0.999995	1	Inhibited	http://www.genome.jp/dbget-bin/show_pathway?hsa05322+3113+55766+6628
Carbohydrate digestion and absorption	4973	41	1	0.704852	0	1	0.951386	0.999995	1	Inhibited	http://www.genome.jp/dbget-bin/show_pathway?hsa04973+3101
Taste transduction	4742	49	1	0.767458	-0.252058	0.921	0.952075	0.999995	1	Inhibited	http://www.genome.jp/dbget-bin/show_pathway?hsa04742+2782
Bladder cancer	5219	42	1	0.713516	0	1	0.954364	0.999995	1	Inhibited	http://www.genome.jp/dbget-bin/show_pathway?hsa05219+4318
Gap junction	4540	86	2	0.721887	0	1	0.95714	0.999995	1	Inhibited	http://www.genome.jp/dbget-bin/show_pathway?hsa04540+7280+113
Progesterone-mediated oocyte maturation	4914	86	2	0.721887	0	1	0.95714	0.999995	1	Inhibited	http://www.genome.jp/dbget-bin/show_pathway?hsa04914+113+64682
Intestinal immune network for IgA production	4672	46	1	0.745708	0	1	0.964514	0.999995	1	Inhibited	http://www.genome.jp/dbget-bin/show_pathway?hsa04672+3113
Endocrine and other factor-regulated calcium reabsorption	4961	48	1	0.760423	0	1	0.968688	0.999995	1	Inhibited	http://www.genome.jp/dbget-bin/show_pathway?hsa04961+163
Cytokine-cytokine receptor interaction	4060	255	5	0.871191	0.0827347	0.879	0.970135	0.999995	1	Activated	http://www.genome.jp/dbget-bin/show_pathway?hsa04060+3560+356+3587+1524+2833
Malaria	5144	49	1	0.767458	0	1	0.970582	0.999995	1	Inhibited	http://www.genome.jp/dbget-bin/show_pathway?hsa05144+975
Mineral absorption	4978	50	1	0.774287	0	1	0.97236	0.999995	1	Inhibited	http://www.genome.jp/dbget-bin/show_pathway?hsa04978+6556
Staphylococcus aureus infection	5150	50	1	0.774287	0	1	0.97236	0.999995	1	Inhibited	http://www.genome.jp/dbget-bin/show_pathway?hsa05150+3113
Pancreatic secretion	4972	97	2	0.781174	0	1	0.974091	0.999995	1	Inhibited	http://www.genome.jp/dbget-bin/show_pathway?hsa04972+488+113
Endometrial cancer	5213	52	1	0.787351	0	1	0.975592	0.999995	1	Inhibited	http://www.genome.jp/dbget-bin/show_pathway?hsa05213+4292
Olfactory transduction	4740	387	2	0.999884	0.578076	0.792	0.976668	0.999995	1	Activated	http://www.genome.jp/dbget-bin/show_pathway?hsa04740+801+808
Complement and coagulation cascades	4610	68	1	0.868046	0	1	0.990884	0.999995	1	Inhibited	http://www.genome.jp/dbget-bin/show_pathway?hsa04610+2153
Bile secretion	4976	71	1	0.879345	0	1	0.992409	0.999995	1	Inhibited	http://www.genome.jp/dbget-bin/show_pathway?hsa04976+113
ECM-receptor interaction	4512	84	1	0.918151	0	1	0.996555	0.999995	1	Inhibited	http://www.genome.jp/dbget-bin/show_pathway?hsa04512+3688
Wnt signaling pathway	4310	151	2	0.938305	0	1	0.998056	0.999995	1	Inhibited	http://www.genome.jp/dbget-bin/show_pathway?hsa04310+4775+1459
Amoebiasis	5146	104	1	0.95497	0	1	0.998971	0.999995	1	Inhibited	http://www.genome.jp/dbget-bin/show_pathway?hsa05146+383
Neuroactive ligand-receptor interaction	4080	267	2	0.996904	0	1	0.999995	0.999995	1	Inhibited	http://www.genome.jp/dbget-bin/show_pathway?hsa04080+706+1901

## Sheet: RA - GSEA
NAME	GS<br> follow link to MSigDB	GS DETAILS	SIZE	ES	NES	NOM p-val	FDR q-val	FWER p-val	RANK AT MAX	LEADING EDGE
KEGG_CARDIAC_MUSCLE_CONTRACTION	KEGG_CARDIAC_MUSCLE_CONTRACTION	Details ...	72	0.532872	1.51976	0.0383795	0.697631	0.602	2011	tags=24%, list=10%, signal=26%
KEGG_O_GLYCAN_BIOSYNTHESIS	KEGG_O_GLYCAN_BIOSYNTHESIS	Details ...	27	0.507287	1.49987	0.0183673	0.436479	0.663	3311	tags=41%, list=17%, signal=49%
KEGG_ALZHEIMERS_DISEASE	KEGG_ALZHEIMERS_DISEASE	Details ...	155	0.546946	1.44714	0.0354167	0.496852	0.786	1652	tags=30%, list=8%, signal=33%
KEGG_GLYCOSAMINOGLYCAN_BIOSYNTHESIS_HEPARAN_SULFATE	KEGG_GLYCOSAMINOGLYCAN_BIOSYNTHESIS_HEPARAN_SULFATE	Details ...	26	0.44427	1.38654	0.0958084	0.637665	0.901	559	tags=12%, list=3%, signal=12%
KEGG_PPAR_SIGNALING_PATHWAY	KEGG_PPAR_SIGNALING_PATHWAY	Details ...	68	0.394416	1.37165	0.0411523	0.5758	0.914	3771	tags=31%, list=19%, signal=38%
KEGG_OXIDATIVE_PHOSPHORYLATION	KEGG_OXIDATIVE_PHOSPHORYLATION	Details ...	114	0.628988	1.3649	0.109731	0.506569	0.923	1460	tags=35%, list=7%, signal=38%
KEGG_HUNTINGTONS_DISEASE	KEGG_HUNTINGTONS_DISEASE	Details ...	168	0.503675	1.33576	0.0943396	0.543646	0.951	1483	tags=23%, list=8%, signal=24%
KEGG_PARKINSONS_DISEASE	KEGG_PARKINSONS_DISEASE	Details ...	112	0.583329	1.32309	0.147917	0.519851	0.958	1463	tags=32%, list=7%, signal=35%
KEGG_GLYCOSPHINGOLIPID_BIOSYNTHESIS_LACTO_AND_NEOLACTO_SERIES	KEGG_GLYCOSPHINGOLIPID_BIOSYNTHESIS_LACTO_AND_NEOLACTO_SERIES	Details ...	25	0.403865	1.31056	0.111753	0.501323	0.964	3024	tags=24%, list=15%, signal=28%
KEGG_RENIN_ANGIOTENSIN_SYSTEM	KEGG_RENIN_ANGIOTENSIN_SYSTEM	Details ...	17	0.610104	1.28955	0.158915	0.519061	0.969	1376	tags=24%, list=7%, signal=25%
KEGG_MATURITY_ONSET_DIABETES_OF_THE_YOUNG	KEGG_MATURITY_ONSET_DIABETES_OF_THE_YOUNG	Details ...	25	0.320374	1.20463	0.262327	0.775801	0.995	3858	tags=20%, list=20%, signal=25%
KEGG_PANTOTHENATE_AND_COA_BIOSYNTHESIS	KEGG_PANTOTHENATE_AND_COA_BIOSYNTHESIS	Details ...	15	0.551766	1.20013	0.254697	0.729095	0.995	1477	tags=27%, list=8%, signal=29%
KEGG_COMPLEMENT_AND_COAGULATION_CASCADES	KEGG_COMPLEMENT_AND_COAGULATION_CASCADES	Details ...	68	0.427679	1.15912	0.271222	0.823893	1	1775	tags=16%, list=9%, signal=18%
KEGG_METABOLISM_OF_XENOBIOTICS_BY_CYTOCHROME_P450	KEGG_METABOLISM_OF_XENOBIOTICS_BY_CYTOCHROME_P450	Details ...	68	0.292883	1.15877	0.225152	0.766386	1	2540	tags=15%, list=13%, signal=17%
KEGG_GLYCINE_SERINE_AND_THREONINE_METABOLISM	KEGG_GLYCINE_SERINE_AND_THREONINE_METABOLISM	Details ...	31	0.429632	1.15426	0.262	0.73142	1	632	tags=13%, list=3%, signal=13%
KEGG_RIBOSOME	KEGG_RIBOSOME	Details ...	80	0.67828	1.15081	0.391393	0.697411	1	1180	tags=35%, list=6%, signal=37%
KEGG_ABC_TRANSPORTERS	KEGG_ABC_TRANSPORTERS	Details ...	43	0.331623	1.11402	0.297131	0.773631	1	511	tags=7%, list=3%, signal=7%
KEGG_SPHINGOLIPID_METABOLISM	KEGG_SPHINGOLIPID_METABOLISM	Details ...	36	0.368986	1.11205	0.287449	0.737494	1	2689	tags=31%, list=14%, signal=35%
KEGG_PROTEASOME	KEGG_PROTEASOME	Details ...	42	0.466261	1.08185	0.399586	0.788983	1	1529	tags=29%, list=8%, signal=31%
KEGG_NEUROACTIVE_LIGAND_RECEPTOR_INTERACTION	KEGG_NEUROACTIVE_LIGAND_RECEPTOR_INTERACTION	Details ...	265	0.237778	1.07592	0.357564	0.768391	1	4740	tags=26%, list=24%, signal=34%
KEGG_RIG_I_LIKE_RECEPTOR_SIGNALING_PATHWAY	KEGG_RIG_I_LIKE_RECEPTOR_SIGNALING_PATHWAY		69	0.354491	1.07028	0.354	0.749022	1	1495	tags=19%, list=8%, signal=20%
KEGG_P53_SIGNALING_PATHWAY	KEGG_P53_SIGNALING_PATHWAY		66	0.333597	1.06863	0.317907	0.719346	1	1646	tags=15%, list=8%, signal=16%
KEGG_DRUG_METABOLISM_CYTOCHROME_P450	KEGG_DRUG_METABOLISM_CYTOCHROME_P450		70	0.251141	1.04633	0.367647	0.751305	1	5774	tags=34%, list=30%, signal=48%
KEGG_STARCH_AND_SUCROSE_METABOLISM	KEGG_STARCH_AND_SUCROSE_METABOLISM		51	0.346683	1.03734	0.412351	0.744529	1	1909	tags=18%, list=10%, signal=20%
KEGG_TYPE_II_DIABETES_MELLITUS	KEGG_TYPE_II_DIABETES_MELLITUS		46	0.336679	1.0254	0.422	0.747349	1	2467	tags=28%, list=13%, signal=32%
KEGG_FRUCTOSE_AND_MANNOSE_METABOLISM	KEGG_FRUCTOSE_AND_MANNOSE_METABOLISM		33	0.388813	1.0221	0.432806	0.726844	1	1647	tags=24%, list=8%, signal=26%
KEGG_GLYCEROPHOSPHOLIPID_METABOLISM	KEGG_GLYCEROPHOSPHOLIPID_METABOLISM		66	0.301809	1.00921	0.452427	0.731919	1	3393	tags=26%, list=17%, signal=31%
KEGG_NICOTINATE_AND_NICOTINAMIDE_METABOLISM	KEGG_NICOTINATE_AND_NICOTINAMIDE_METABOLISM		22	0.370577	1.00892	0.460123	0.706536	1	1743	tags=23%, list=9%, signal=25%
KEGG_SNARE_INTERACTIONS_IN_VESICULAR_TRANSPORT	KEGG_SNARE_INTERACTIONS_IN_VESICULAR_TRANSPORT		37	0.334077	1.00376	0.46493	0.694658	1	2004	tags=30%, list=10%, signal=33%
KEGG_GALACTOSE_METABOLISM	KEGG_GALACTOSE_METABOLISM		26	0.373806	0.989311	0.487805	0.704861	1	1389	tags=23%, list=7%, signal=25%
KEGG_TOLL_LIKE_RECEPTOR_SIGNALING_PATHWAY	KEGG_TOLL_LIKE_RECEPTOR_SIGNALING_PATHWAY		101	0.325407	0.969322	0.477583	0.729649	1	1894	tags=21%, list=10%, signal=23%
KEGG_NITROGEN_METABOLISM	KEGG_NITROGEN_METABOLISM		23	0.413983	0.960649	0.528958	0.72706	1	74	tags=9%, list=0%, signal=9%
KEGG_GLUTATHIONE_METABOLISM	KEGG_GLUTATHIONE_METABOLISM		48	0.344946	0.956116	0.535714	0.714947	1	1518	tags=21%, list=8%, signal=23%
KEGG_BIOSYNTHESIS_OF_UNSATURATED_FATTY_ACIDS	KEGG_BIOSYNTHESIS_OF_UNSATURATED_FATTY_ACIDS		20	0.36528	0.947766	0.536885	0.712008	1	1741	tags=25%, list=9%, signal=27%
KEGG_REGULATION_OF_AUTOPHAGY	KEGG_REGULATION_OF_AUTOPHAGY		34	0.300745	0.934254	0.542094	0.720899	1	1529	tags=15%, list=8%, signal=16%
KEGG_AXON_GUIDANCE	KEGG_AXON_GUIDANCE		125	0.241606	0.92874	0.61017	0.712382	1	2422	tags=18%, list=12%, signal=21%
KEGG_PATHOGENIC_ESCHERICHIA_COLI_INFECTION	KEGG_PATHOGENIC_ESCHERICHIA_COLI_INFECTION		51	0.406804	0.906543	0.61167	0.740603	1	1397	tags=25%, list=7%, signal=27%
KEGG_GNRH_SIGNALING_PATHWAY	KEGG_GNRH_SIGNALING_PATHWAY		98	0.273507	0.895187	0.657315	0.744302	1	1636	tags=15%, list=8%, signal=17%
KEGG_ECM_RECEPTOR_INTERACTION	KEGG_ECM_RECEPTOR_INTERACTION		83	0.271947	0.872387	0.628283	0.770825	1	3218	tags=18%, list=16%, signal=22%
KEGG_AMINO_SUGAR_AND_NUCLEOTIDE_SUGAR_METABOLISM	KEGG_AMINO_SUGAR_AND_NUCLEOTIDE_SUGAR_METABOLISM		44	0.302818	0.870728	0.704981	0.755028	1	1612	tags=20%, list=8%, signal=22%
KEGG_TERPENOID_BACKBONE_BIOSYNTHESIS	KEGG_TERPENOID_BACKBONE_BIOSYNTHESIS		15	0.408027	0.858276	0.662626	0.760525	1	2958	tags=33%, list=15%, signal=39%
KEGG_FOCAL_ADHESION	KEGG_FOCAL_ADHESION		198	0.236008	0.840785	0.776031	0.775974	1	2641	tags=17%, list=13%, signal=20%
KEGG_BLADDER_CANCER	KEGG_BLADDER_CANCER		41	0.293802	0.821361	0.814371	0.794075	1	1656	tags=15%, list=8%, signal=16%
KEGG_PYRIMIDINE_METABOLISM	KEGG_PYRIMIDINE_METABOLISM		93	0.287736	0.812034	0.755319	0.791707	1	1787	tags=20%, list=9%, signal=22%
KEGG_REGULATION_OF_ACTIN_CYTOSKELETON	KEGG_REGULATION_OF_ACTIN_CYTOSKELETON		208	0.2469	0.791478	0.79596	0.808308	1	2704	tags=19%, list=14%, signal=22%
KEGG_OLFACTORY_TRANSDUCTION	KEGG_OLFACTORY_TRANSDUCTION		374	0.145479	0.736376	0.756539	0.868866	1	7145	tags=38%, list=37%, signal=59%

## Sheet: RA - GSEAPreranked
NAME	GS<br> follow link to MSigDB	GS DETAILS	SIZE	ES	NES	NOM p-val	FDR q-val	FWER p-val	RANK AT MAX	LEADING EDGE
KEGG_GALACTOSE_METABOLISM	KEGG_GALACTOSE_METABOLISM	Details ...	26	0.994537	1.36994	0.0687285	1	0.823	22	tags=4%, list=0%, signal=4%
KEGG_O_GLYCAN_BIOSYNTHESIS	KEGG_O_GLYCAN_BIOSYNTHESIS	Details ...	27	0.934062	1.29206	0.276753	1	0.995	137	tags=4%, list=1%, signal=4%
KEGG_STARCH_AND_SUCROSE_METABOLISM	KEGG_STARCH_AND_SUCROSE_METABOLISM	Details ...	51	0.993595	1.27961	0.111111	1	0.998	22	tags=2%, list=0%, signal=2%
KEGG_COMPLEMENT_AND_COAGULATION_CASCADES	KEGG_COMPLEMENT_AND_COAGULATION_CASCADES	Details ...	68	0.958608	1.25878	0.225532	1	1	49	tags=1%, list=0%, signal=1%
KEGG_OXIDATIVE_PHOSPHORYLATION	KEGG_OXIDATIVE_PHOSPHORYLATION	Details ...	114	0.978909	1.2423	0.196653	1	1	160	tags=11%, list=1%, signal=11%
KEGG_TYPE_II_DIABETES_MELLITUS	KEGG_TYPE_II_DIABETES_MELLITUS	Details ...	46	0.953971	1.20111	0.270492	1	1	22	tags=2%, list=0%, signal=2%
KEGG_PARKINSONS_DISEASE	KEGG_PARKINSONS_DISEASE	Details ...	112	0.939021	1.16948	0.330882	1	1	156	tags=9%, list=1%, signal=9%
KEGG_HUNTINGTONS_DISEASE	KEGG_HUNTINGTONS_DISEASE	Details ...	168	0.915065	1.15776	0.378277	1	1	112	tags=5%, list=1%, signal=5%
KEGG_TOLL_LIKE_RECEPTOR_SIGNALING_PATHWAY	KEGG_TOLL_LIKE_RECEPTOR_SIGNALING_PATHWAY	Details ...	101	0.917847	1.13222	0.385892	1	1	130	tags=3%, list=1%, signal=3%
KEGG_GLYCEROPHOSPHOLIPID_METABOLISM	KEGG_GLYCEROPHOSPHOLIPID_METABOLISM	Details ...	66	0.872639	1.11799	0.443983	1	1	643	tags=8%, list=3%, signal=8%
KEGG_METABOLISM_OF_XENOBIOTICS_BY_CYTOCHROME_P450	KEGG_METABOLISM_OF_XENOBIOTICS_BY_CYTOCHROME_P450	Details ...	68	0.882468	1.11576	0.423664	1	1	68	tags=1%, list=0%, signal=1%
KEGG_VASCULAR_SMOOTH_MUSCLE_CONTRACTION	KEGG_VASCULAR_SMOOTH_MUSCLE_CONTRACTION	Details ...	112	0.910785	1.11459	0.435146	1	1	8	tags=2%, list=0%, signal=2%
KEGG_DRUG_METABOLISM_CYTOCHROME_P450	KEGG_DRUG_METABOLISM_CYTOCHROME_P450	Details ...	70	0.882311	1.10295	0.454545	1	1	68	tags=1%, list=0%, signal=1%
KEGG_NITROGEN_METABOLISM	KEGG_NITROGEN_METABOLISM	Details ...	23	0.750944	1.09843	0.427536	1	1	140	tags=4%, list=1%, signal=4%
KEGG_CARDIAC_MUSCLE_CONTRACTION	KEGG_CARDIAC_MUSCLE_CONTRACTION	Details ...	72	0.817055	1.07572	0.463878	1	1	319	tags=11%, list=2%, signal=11%
KEGG_EPITHELIAL_CELL_SIGNALING_IN_HELICOBACTER_PYLORI_INFECTION	KEGG_EPITHELIAL_CELL_SIGNALING_IN_HELICOBACTER_PYLORI_INFECTION	Details ...	64	0.83891	1.07404	0.486381	1	1	57	tags=3%, list=0%, signal=3%
KEGG_BASAL_TRANSCRIPTION_FACTORS	KEGG_BASAL_TRANSCRIPTION_FACTORS	Details ...	33	0.794184	1.06011	0.493827	1	1	37	tags=3%, list=0%, signal=3%
KEGG_ALZHEIMERS_DISEASE	KEGG_ALZHEIMERS_DISEASE	Details ...	155	0.866475	1.05735	0.495763	0.99091	1	112	tags=6%, list=1%, signal=6%
KEGG_GLUTATHIONE_METABOLISM	KEGG_GLUTATHIONE_METABOLISM	Details ...	48	0.799108	1.04238	0.530686	0.968461	1	180	tags=4%, list=1%, signal=4%
KEGG_ABC_TRANSPORTERS	KEGG_ABC_TRANSPORTERS	Details ...	43	0.74158	0.988206	0.549242	1	1	120	tags=2%, list=1%, signal=2%
KEGG_SNARE_INTERACTIONS_IN_VESICULAR_TRANSPORT	KEGG_SNARE_INTERACTIONS_IN_VESICULAR_TRANSPORT		37	0.732189	0.981949	0.546875	0.972778	1	179	tags=8%, list=1%, signal=8%
KEGG_GLYCOSPHINGOLIPID_BIOSYNTHESIS_LACTO_AND_NEOLACTO_SERIES	KEGG_GLYCOSPHINGOLIPID_BIOSYNTHESIS_LACTO_AND_NEOLACTO_SERIES		25	0.663899	0.942782	0.571429	0.987726	1	1063	tags=12%, list=5%, signal=13%
KEGG_RETINOL_METABOLISM	KEGG_RETINOL_METABOLISM		62	0.733184	0.933947	0.643411	0.958331	1	539	tags=3%, list=3%, signal=3%
KEGG_ASTHMA	KEGG_ASTHMA		29	0.622721	0.860727	0.666667	1	1	64	tags=3%, list=0%, signal=3%
KEGG_VIBRIO_CHOLERAE_INFECTION	KEGG_VIBRIO_CHOLERAE_INFECTION		51	0.638416	0.833681	0.707224	1	1	57	tags=4%, list=0%, signal=4%
KEGG_BLADDER_CANCER	KEGG_BLADDER_CANCER		41	0.618209	0.808736	0.725424	0.998423	1	86	tags=2%, list=0%, signal=2%
KEGG_PPAR_SIGNALING_PATHWAY	KEGG_PPAR_SIGNALING_PATHWAY		68	0.635286	0.792938	0.736842	0.981525	1	1397	tags=12%, list=7%, signal=13%
KEGG_PROXIMAL_TUBULE_BICARBONATE_RECLAMATION	KEGG_PROXIMAL_TUBULE_BICARBONATE_RECLAMATION		23	0.568895	0.77542	0.704319	0.966074	1	140	tags=4%, list=1%, signal=4%
KEGG_PATHOGENIC_ESCHERICHIA_COLI_INFECTION	KEGG_PATHOGENIC_ESCHERICHIA_COLI_INFECTION		51	0.568	0.748079	0.759542	0.964582	1	159	tags=6%, list=1%, signal=6%
KEGG_MATURITY_ONSET_DIABETES_OF_THE_YOUNG	KEGG_MATURITY_ONSET_DIABETES_OF_THE_YOUNG		25	0.521883	0.721952	0.773333	0.960513	1	2121	tags=12%, list=11%, signal=13%
KEGG_INSULIN_SIGNALING_PATHWAY	KEGG_INSULIN_SIGNALING_PATHWAY		136	0.551296	0.700624	0.847909	0.952158	1	22	tags=1%, list=0%, signal=1%
KEGG_RENAL_CELL_CARCINOMA	KEGG_RENAL_CELL_CARCINOMA		68	0.475457	0.600043	0.918605	1	1	148	tags=3%, list=1%, signal=3%
KEGG_ALPHA_LINOLENIC_ACID_METABOLISM	KEGG_ALPHA_LINOLENIC_ACID_METABOLISM		16	0.386599	0.554835	0.860119	1	1	1633	tags=13%, list=8%, signal=14%
KEGG_SPHINGOLIPID_METABOLISM	KEGG_SPHINGOLIPID_METABOLISM		36	0.395259	0.523988	0.940426	1	1	1083	tags=19%, list=6%, signal=21%
KEGG_TERPENOID_BACKBONE_BIOSYNTHESIS	KEGG_TERPENOID_BACKBONE_BIOSYNTHESIS		15	0.327571	0.471359	0.940476	1	1	4932	tags=33%, list=25%, signal=45%
KEGG_ARACHIDONIC_ACID_METABOLISM	KEGG_ARACHIDONIC_ACID_METABOLISM		55	0.271807	0.352297	0.991935	0.993136	1	1132	tags=7%, list=6%, signal=8%

## Sheet: CRC - pathfindR
ID	Pathway	Fold_Enrichment	occurrence	lowest_p	highest_p	Up_regulated	Down_regulated
hsa04974	Protein digestion and absorption	3.66898	10	2.96639e-12	2.96639e-12	ATP1A2, SLC38A2, ELN, COL1A1, COL1A2, COL4A2, COL4A1, COL5A2, COL6A1, COL6A2, COL6A3, COL12A1, COL14A1, COL15A1, COL18A1	MEP1B, ACE2
hsa04512	ECM-receptor interaction	3.77689	10	2.65775e-10	2.65775e-10	COL1A1, COL1A2, COL4A2, COL4A1, COL6A1, COL6A2, COL6A3, LAMA4, LAMB2, LAMC1, RELN, THBS2, FN1, VWF, ITGA1, ITGA5, ITGA7, ITGA9, SV2B	ITGA2, HMMR
hsa04380	Osteoclast differentiation	1.42037	10	3.28382e-09	4.45732e-06	TGFBR2, FYN, NFATC2, FOS, FOSB, JUN, JUND, JUNB, SIRPA, MITF, CTSK, SOCS3	RAC1, PPP3R1
hsa05205	Proteoglycans in cancer	1.86074	10	4.13869e-09	4.13869e-09	MRAS, CDC42, FLNA, ANK2, PPP1R12B, ITPR1, DCN, IGF1, CAV1, CAV2, TIMP3, LUM, FN1, FZD4, ITGA5, SDC2, RDX, MSN, FGF2, FGFR1, HBEGF	RAC1, FLNB, PAK1, ANK3, CASP3, ITGA2, HGF, PRKACB
hsa05130	Pathogenic Escherichia coli infection	1.97837	10	8.18159e-09	8.18159e-09	TUBA1A, TUBB6, TUBB, TUBB2A, TUBB2B, FYN, CDC42	ARPC4, OCLN
hsa00280	Valine, leucine and isoleucine degradation	7.06562	10	1.16253e-08	7.5385e-05	BCAT1	BCKDHB, ACADS, ACADM, ACADSB, HADHA, EHHADH, ECHS1, HADH, ACAA1, ACAA2, PCCA, PCCB, MUT, HIBCH, ALDH6A1, ALDH3A2, ALDH7A1, ABAT, MCCC2, AUH, HMGCL, ACAT2, ACAT1, HMGCS2
hsa04010	MAPK signaling pathway	1.57371	10	1.20826e-08	9.9567e-08	CACNA2D1, RASGRP4, FGF2, FGF7, IGF1, PDGFB, VEGFC, FGFR1, PDGFRB, MRAS, RPS6KA2, FOS, TGFBR2, CDC42, MAP3K3, FLNA, JUN, JUND, DUSP1, DUSP6, DUSP10, NR4A1	PRKACB, PPP3R1, PGF, HGF, INSR, LAMTOR3, RPS6KA6, RAC1, CASP3, PAK1, FLNB, PPM1A, NLK
hsa04520	Adherens junction	2.33808	10	1.80999e-08	7.83528e-07	CDC42, SORBS1, ACTN1, CTNNA2, PTPRM, TCF7L1, FGFR1, FYN, TGFBR2	FARP2, RAC1, INSR, NLK
hsa04810	Regulation of actin cytoskeleton	2.12415	10	2.16776e-08	2.16776e-08	LPAR1, CXCL12, CXCR4, FGF2, FGF7, PDGFB, FGFR1, PDGFRB, FN1, ITGA1, ITGA5, ITGA7, ITGA9, MRAS, CDC42, MYLK, PPP1R12B, MYL9, PIP4K2A, PIP4K2B, ENAH, ABI2, RDX, MSN, CFL2, ACTN1, MYH10	ITGA2, VAV3, RAC1, PAK1, ARPC4, IQGAP2, SCIN
hsa05166	Human T-cell leukemia virus 1 infection	1.01023	10	2.78725e-08	0.000124795	NFATC2, NFATC4, MRAS, FZD4, PDGFB, PDGFRB, JUN, MAP3K3, ZFP36, FOS, EGR1, EGR2, ATF3, CRTC3, TGFBR2	PPP3R1, VDAC1, SLC25A5, ADCY6, PRKACB
hsa04510	Focal adhesion	2.66747	10	1.45627e-07	1.45627e-07	COL1A1, COL1A2, COL4A2, COL4A1, COL6A1, COL6A2, COL6A3, LAMA4, LAMB2, LAMC1, RELN, THBS2, FN1, VWF, ITGA1, ITGA5, ITGA7, ITGA9, PDGFB, IGF1, VEGFC, PDGFRB, MYL9, PPP1R12B, MYLK, ACTN1, FLNA, PARVB, CDC42, JUN, CAV1, CAV2, FYN	ITGA2, PGF, HGF, FLNB, VAV3, RAC1, PAK1
hsa04540	Gap junction	2.15822	10	1.49717e-07	1.49717e-07	LPAR1, GNAI2, PDGFB, PDGFRB, TUBA1A, TUBB6, TUBB, TUBB2A, TUBB2B, ADRB1, ITPR1, GUCY1A2	ADCY6, PRKACB
hsa05012	Parkinson disease	1.67975	10	7.90609e-07	0.000942122	GNAI2, SNCA, SNCAIP, UCHL1, LRRK2	PRKACB, NDUFA10, NDUFS1, NDUFS2, SDHA, COX5A, VDAC1, SLC25A5, CYCS, CASP3
hsa04662	B cell receptor signaling pathway	1.20423	10	1.44619e-06	0.00748718	NFATC2, FOS, JUN, CD81	VAV3, RAC1, PPP3R1
hsa00071	Fatty acid degradation	5.04485	10	3.21735e-06	9.24078e-05	ADH1B	ACAT2, ACAT1, ACAA1, ACAA2, HADH, HADHA, EHHADH, ECHS1, ACOX1, ACADS, ACADM, ACADSB, CPT2, ADH6, ALDH3A2, ALDH7A1
hsa04145	Phagosome	1.22194	10	4.10827e-06	4.10827e-06	TUBA1A, TUBB6, TUBB, TUBB2A, TUBB2B, C1R, C3, COLEC12, ITGA5, THBS2, MRC2	ATP6V1D, ITGA2, RAC1
hsa04658	Th1 and Th2 cell differentiation	0.698249	10	5.40366e-06	0.0162918	NOTCH3, NFATC2, FOS, JUN	PPP3R1
hsa05165	Human papillomavirus infection	1.34529	10	5.92132e-06	5.92132e-06	FZD4, TCF7L1, PARD6G, CDC42, VWF, THBS2, FN1, COL1A1, COL1A2, COL4A2, COL4A1, COL6A1, COL6A2, COL6A3, LAMA4, LAMB2, LAMC1, RELN, ITGA1, ITGA5, ITGA7, ITGA9, PPP2CA, PDGFRB, HDAC9, PTGS2, NOTCH3, HES4	MPP5, ITGA2, CASP3, CCNE1, ATP6V1D, PRKACB
hsa05161	Hepatitis B	0.774146	10	6.4039e-06	0.000110501	EGR2, NFATC2, NFATC4, JUN, FOS	CYCS, CASP3, MAVS, CCNE1
hsa05412	Arrhythmogenic right ventricular cardiomyopathy (ARVC)	2.45591	10	6.54691e-06	0.109895	ITGA1, ITGA5, ITGA7, ITGA9, DMD, DES, TCF7L1, CACNA2D1, CTNNA2	ITGA2, DSC2, PKP2
hsa00640	Propanoate metabolism	7.03421	10	7.11333e-06	0.000274897		BCKDHB, ACADM, HADHA, EHHADH, ECHS1, HIBCH, ABAT, PCCA, PCCB, MUT, SUCLG1, SUCLG2, ALDH6A1, LDHC, ACAT2, ACAT1
hsa04151	PI3K-Akt signaling pathway	1.50733	10	7.98037e-06	7.98037e-06	FGF2, FGF7, IGF1, PDGFB, VEGFC, FGFR1, PDGFRB, OSMR, COL1A1, COL1A2, COL4A2, COL4A1, COL6A1, COL6A2, COL6A3, LAMA4, LAMB2, LAMC1, RELN, THBS2, FN1, VWF, ITGA1, ITGA5, ITGA7, ITGA9, LPAR1, GNB4, GNG7, GNG11, PPP2CA, NR4A1	PGF, HGF, INSR, RAC1, PRLR, ITGA2, G6PC, CCNE1
hsa04660	T cell receptor signaling pathway	0.999599	10	8.66336e-06	0.00117101	FYN, CDC42, NFATC2, FOS, JUN	VAV3, PAK1, PPP3R1
hsa04659	Th17 cell differentiation	0.593512	10	1.15915e-05	0.0255719	TGFBR2, NFATC2, FOS, JUN	PPP3R1
hsa04933	AGE-RAGE signaling pathway in diabetic complications	2.06439	10	1.16834e-05	1.16834e-05	TGFBR2, FN1, COL1A1, COL1A2, COL4A2, COL4A1, AGTR1, JUN, VEGFC, CCL2, THBD, CDC42, EGR1	PLCD3, RAC1, CASP3
hsa04657	IL-17 signaling pathway	1.20205	10	1.73113e-05	2.09138e-05	FOS, FOSB, JUN, JUND, CEBPB, CCL2, PTGS2	CASP3
hsa04625	C-type lectin receptor signaling pathway	1.27637	10	2.16653e-05	0.00131617	MRAS, ITPR1, NFATC2, NFATC4, EGR2, PTGS2, JUN, PLK3	PPP3R1, PAK1
hsa05167	Kaposi sarcoma-associated herpesvirus infection	1.16644	10	2.94988e-05	0.00222778	C3, ZFP36, GNB4, GNG7, GNG11, JUN, FOS, ITPR1, NFATC2, NFATC4, PTGS2, FGF2, PDGFB	CYCS, CASP3, RAC1, PPP3R1
hsa05170	Human immunodeficiency virus 1 infection	1.23648	10	6.40386e-05	0.00531157	CXCR4, GNAI2, GNAO1, FOS, JUN, ITPR1, NFATC2, NFATC4, GNB4, GNG7, GNG11, CFL2, SAMHD1, AP1M1, AP1S2	PPP3R1, RAC1, PAK1, CYCS, CASP3
hsa04921	Oxytocin signaling pathway	1.86392	10	6.74023e-05	0.0226959	PTGS2, JUN, FOS, RYR3, CACNA2D1, ITPR1, NFATC2, NFATC4, RGS2, GUCY1A2, NPR1, MYLK, MYL9, PPP1R12B, GNAI2, GNAO1	PPP3R1, ADCY6, PRKACB
hsa05168	Herpes simplex infection	0.754755	10	7.23269e-05	0.00362744	JUN, FOS, CCL2, C3, TAF9B, SOCS3	MAVS, OAS1, CASP3, CYCS, ARNTL
hsa04668	TNF signaling pathway	1.11983	10	7.51075e-05	0.000212202	JUN, CEBPB, CCL2, CX3CL1, SOCS3, FOS, JUNB, PTGS2, VEGFC	CASP3
hsa04022	cGMP-PKG signaling pathway	2.23125	10	8.30192e-05	8.30192e-05	AGTR1, EDNRA, NFATC2, NFATC4, NPR1, KCNMA1, KCNMB1, ATP1A2, ATP2B4, RGS2, ITPR1, MRVI1, PLN, MYLK, MYL9, PDE2A, GUCY1A2, GNAI2, ADRB1	PPP3R1, GATA4, ADCY6, INSR, VDAC1, SLC25A5
hsa00650	Butanoate metabolism	5.93512	10	8.61242e-05	0.00275864		ACAT2, ACAT1, HADH, HADHA, EHHADH, ECHS1, ACADS, ABAT, HMGCS2, HMGCL, BDH1
hsa05132	Salmonella infection	1.35231	10	0.000111497	0.000111497	CDC42, FOS, JUN, KLC1, FLNA, MYH10	RAC1, ARPC4, FLNB
hsa05014	Amyotrophic lateral sclerosis (ALS)	1.89924	10	0.000195161	0.000195161	PRPH, NEFL, NEFM, NEFH	PPP3R1, CYCS, CASP3, RAC1
hsa04530	Tight junction	1.76449	10	0.000398948	0.000398948	JAM2, BVES, CDC42, PARD6G, MPDZ, AMOTL1, AMOTL2, PPP2CA, JUN, RDX, MSN, MYH10, MYH11, MYL9, ACTN1, TUBA1A	OCLN, MPP5, RAC1, GATA4, PRKACB, EPB41L4B
hsa04150	mTOR signaling pathway	0.703421	10	0.00046493	0.00152873	FZD4, IGF1, RPS6KA2	ATP6V1D, LAMTOR3, STRADB, INSR, RPS6KA6
hsa05120	Epithelial cell signaling in Helicobacter pylori infection	1.46095	10	0.000503034	0.00113324	JAM2, HBEGF, CDC42, JUN	RAC1, PAK1, CASP3, ATP6V1D
hsa05418	Fluid shear stress and atherosclerosis	1.54041	10	0.000533585	0.00105214	CAV1, CAV2, SDC2, GSTM5, THBD, PECAM1, KLF2, DUSP1, FOS, JUN, CCL2, PDGFB	HMOX1, MGST1, NQO1, TXN, RAC1
hsa04015	Rap1 signaling pathway	1.45081	10	0.00065034	0.00065034	MRAS, LPAR1, FGF2, FGF7, IGF1, PDGFB, VEGFC, FGFR1, PDGFRB, CNR1, GNAI2, GNAO1, CDC42, PARD6G	ADCY6, PGF, HGF, INSR, SIPA1L1, RALA, RAC1, FARP2
hsa05164	Influenza A	0.604853	10	0.000671234	0.000671234	JUN, CCL2, SOCS3	OAS1, MAVS, TRIM25, VDAC1, CYCS
hsa05100	Bacterial invasion of epithelial cells	1.60409	10	0.00070723	0.00070723	CTNNA2, CDC42, CAV1, CAV2, FN1, ITGA5, ARHGEF26	RAC1, ARPC4, CD2AP
hsa05146	Amoebiasis	1.53615	10	0.000720543	0.000720543	COL1A1, COL1A2, COL4A2, COL4A1, FN1, LAMA4, LAMB2, LAMC1, ACTN1	CASP3, PRKACB
hsa05133	Pertussis	1.72032	10	0.000787283	0.053707	ITGA5, CFL2, C1R, C1S, C3, SERPING1, FOS, JUN, GNAI2	CASP3
hsa00380	Tryptophan metabolism	4.31645	10	0.000795705	0.016729	MAOB, CYP1B1	HADHA, EHHADH, ECHS1, HADH, ACAT2, ACAT1, DDC, MAOA, ALDH3A2, ALDH7A1
hsa04072	Phospholipase D signaling pathway	1.27531	10	0.00107993	0.00107993	PDGFB, PDGFRB, MRAS, FYN, AGTR1, AVPR1A, LPAR1, PTGFR, CYTH3	INSR, RALA, PLD1, ADCY6
hsa04014	Ras signaling pathway	1.37887	10	0.00116547	0.00116547	FGF2, FGF7, IGF1, PDGFB, VEGFC, FGFR1, PDGFRB, RASGRP4, GNB4, GNG7, GNG11, MRAS, PLA1A, RGL1, CDC42	PGF, HGF, INSR, PRKACB, RAC1, PAK1, RALA, PLD1
hsa05210	Colorectal cancer	1.25685	10	0.00129243	0.00655735	TCF7L1, JUN, FOS, TGFBR2, MSH6	RALA, RAC1, CASP3, CYCS
hsa05200	Pathways in cancer	1.43653	10	0.00139403	0.00673232	CTNNA2, TCF7L1, FZD4, LPAR1, AGTR1, CXCL12, CXCR4, GNAI2, PTGER3, GNB4, GNG7, GNG11, COL4A2, COL4A1, LAMA4, LAMB2, LAMC1, FN1, PTGS2, EDNRA, RASGRP4, VEGFC, PDGFB, PDGFRB, IGF1, FGF2, FGF7, FGFR1, JUN, FOS, CDC42, ZBTB16, RUNX1T1, MITF, TGFBR2, MSH6, GSTM5, NOTCH3, GLI3	CASP3, FRAT2, ADCY6, PRKACB, ITGA2, IL13RA1, PGF, HGF, RALA, RAC1, PAX8, CCNE1, CYCS, HMOX1, NQO1, MGST1, EGLN1, PLD1
hsa05169	Epstein-Barr virus infection	0.497183	10	0.00148343	0.00148343	JUN, VIM	MAVS, OAS1, CYCS, CASP3, RAC1, CCNE1
hsa04934	Cushing syndrome	0.957277	10	0.00213465	0.00313563	KMT2A, GNAI2, NR4A1, AGTR1, ITPR1, FZD4, TCF7L1	ADCY6, PRKACB, CCNE1
hsa00190	Oxidative phosphorylation	0.757675	10	0.00219006	0.00219006		NDUFS1, NDUFS2, NDUFA10, SDHA, COX5A, ATP6V1D
hsa04144	Endocytosis	1.18165	10	0.00223191	0.0027512	EHD2, TGFBR2, CXCR4, GRK5, CAV1, CAV2, RAB31, KIF5A, KIF5C, PARD6G, CDC42, ASAP1, CYTH3	PLD1, ARPC4, VTA1, PDCD6IP, SMAP1, ASAP3, ACAP2, PSD3, ARFGEF1
hsa04722	Neurotrophin signaling pathway	0.728874	10	0.00225063	0.00225063	RPS6KA2, MAP3K3, ARHGDIB, CDC42, JUN	RPS6KA6, RAC1
hsa04926	Relaxin signaling pathway	1.63727	10	0.00241372	0.00241372	GNAO1, GNAI2, GNB4, GNG7, GNG11, VEGFC, TGFBR2, ACTA2, COL1A1, COL1A2, COL4A2, COL4A1, JUN, FOS	PRKACB, ADCY6
hsa04024	cAMP signaling pathway	1.63216	10	0.00241799	0.00391089	ADRB1, NPR1, GABBR1, EDNRA, PTGER3, GNAI2, FOS, JUN, GLI3, MYL9, PLN, ATP1A2, FXYD1, ATP2B4	ADCY6, PLD1, VAV3, RAC1, PAK1, PRKACB, PPARA, ACOX1
hsa04310	Wnt signaling pathway	1.53164	10	0.00241811	0.00505738	SERPINF1, SFRP1, SFRP2, FZD4, TCF7L1, SOX17, JUN, DAAM2, NFATC2, NFATC4	FRAT2, NLK, PRKACB, TBL1XR1, RAC1, PPP3R1
hsa05226	Gastric cancer	0.828156	10	0.00267019	0.0415843	FZD4, TCF7L1, TGFBR2, CTNNA2, FGF2, FGF7	FRAT2, CCNE1, HGF
hsa04392	Hippo signaling pathway - multiple species	1.97837	10	0.00291526	0.00291526	DCHS1, LATS2, WWTR1	PAK1
hsa04390	Hippo signaling pathway	0.879277	10	0.00313563	0.0196985	PARD6G, WWTR1, PPP2CA, LATS2, CTGF, TGFBR2, FZD4, TCF7L1, CTNNA2	MPP5
hsa00630	Glyoxylate and dicarboxylate metabolism	2.84886	10	0.00323619	0.00323619		MDH2, ACAT2, ACAT1, PCCA, PCCB, MUT
hsa04110	Cell cycle	0.389188	10	0.00344292	0.00344292	CDKN1C	CCNE1, CDC14B, ORC2
hsa04932	Non-alcoholic fatty liver disease (NAFLD)	1.2495	10	0.0038088	0.0038088	SOCS3, ADIPOQ, CDC42, JUN	INSR, PPARA, RAC1, CYCS, CASP3, NDUFA10, NDUFS1, NDUFS2, SDHA, COX5A
hsa05142	Chagas disease (American trypanosomiasis)	0.999599	10	0.00389945	0.00570788	FOS, JUN, CCL2, PPP2CA, C3, GNAI2, GNAO1, TGFBR2
hsa00410	beta-Alanine metabolism	4.83602	10	0.00512082	0.015808	SRM, AOC3	ABAT, ALDH3A2, ALDH7A1, HIBCH, HADHA, EHHADH, ECHS1, ACADM, ALDH6A1
hsa04670	Leukocyte transendothelial migration	1.69575	10	0.00564625	0.00564625	JAM2, PECAM1, MSN, CTNNA2, THY1, MYL9, ACTN1, CXCL12, CXCR4, GNAI2, CDC42	OCLN, RAC1, VAV3
hsa00620	Pyruvate metabolism	3.14212	10	0.00565919	0.00722436		PDHA1, ALDH3A2, ALDH7A1, LDHC, LDHD, ME2, MDH2, ACAT2, ACAT1
hsa04114	Oocyte meiosis	1.31892	1	0.00687218	0.00687218	IGF1, CPEB1, RPS6KA2, PPP2CA, ITPR1	ADCY6, PRKACB, CPEB3, RPS6KA6, CCNE1, PPP3R1
hsa05215	Prostate cancer	0.90317	10	0.00777865	0.0105457	ETV5, PDGFB, IGF1, PDGFRB, FGFR1, TCF7L1	CCNE1
hsa04210	Apoptosis	0.927362	10	0.00796349	0.00796349	TUBA1A, ITPR1, CTSB, CTSK, JUN, FOS	CASP3, CYCS, PARP4, CTSV
hsa00310	Lysine degradation	2.72026	10	0.00800278	0.10887	KMT2A, SETD7	ALDH7A1, HADHA, EHHADH, ECHS1, HADH, ACAT2, ACAT1, ALDH3A2, PLOD2
hsa05140	Leishmaniasis	0.68813	10	0.00848004	0.010984	C3, PTGS2, FOS, JUN
hsa05222	Small cell lung cancer	1.48378	10	0.00893339	0.00893339	COL4A2, COL4A1, LAMA4, LAMB2, LAMC1, FN1, PTGS2	CYCS, CASP3, CCNE1, ITGA2
hsa05160	Hepatitis C	0.704166	10	0.0104647	0.0152694	CD81, SOCS3, PPP2CA	OCLN, OAS1, MAVS, PPARA
hsa05031	Amphetamine addiction	1.55675	10	0.0108051	0.0108051	MAOB, FOS, JUN, FOSB	DDC, MAOA, PRKACB, PPP3R1
hsa04621	NOD-like receptor signaling pathway	0.802043	10	0.0113877	0.0145106	CCL2, JUN, ANTXR1, CTSB, PANX1, ITPR1	MAVS, VDAC1, OAS1, TXN
hsa04914	Progesterone-mediated oocyte maturation	1.21746	10	0.011933	0.0130108	GNAI2, CPEB1, RPS6KA2, IGF1	ADCY6, PRKACB, CPEB3, RPS6KA6
hsa04923	Regulation of lipolysis in adipocytes	2.58049	10	0.0119579	0.029199	ADRB1, NPR1, FABP4, PTGS2, PTGER3, GNAI2	ADCY6, PRKACB, ABHD5, INSR
hsa04071	Sphingolipid signaling pathway	0.949619	10	0.0120889	0.0120889	DEGS1, PPP2CA, FYN, GNAI2, S1PR1, S1PR3	PLD1, RAC1
hsa05016	Huntington disease	0.94333	10	0.0132467	0.0132467	ITPR1	CASP3, RCOR1, DNAH17, NDUFA10, NDUFS1, NDUFS2, SDHA, COX5A, VDAC1, SLC25A5, CYCS
hsa05030	Cocaine addiction	1.80634	9	0.0144304	0.0191248	MAOB, GNAI2, JUN, FOSB	DDC, MAOA, PRKACB
hsa04270	Vascular smooth muscle contraction	2.40072	10	0.0147033	0.0147033	AGTR1, EDNRA, AVPR1A, KCNMA1, KCNMB1, MYLK, MYL9, ITPR1, CALD1, ACTA2, ACTG2, PPP1R12B, NPR1, MRVI1, GUCY1A2, MYH11	ADCY6, PRKACB
hsa04915	Estrogen signaling pathway	1.18702	10	0.014973	0.0231605	FKBP5, KRT24, FOS, JUN, HBEGF, GABBR1, GNAI2, GNAO1, ITPR1	ADCY6, PRKACB
hsa04664	Fc epsilon RI signaling pathway	0.565249	10	0.0165128	0.0165128	FYN	RAC1, VAV3
hsa05211	Renal cell carcinoma	1.27833	10	0.0172519	0.0172519	PDGFB, JUN, CDC42	EGLN1, HGF, RAC1, PAK1
hsa05202	Transcriptional misregulation in cancer	1.29493	10	0.0179261	0.0208016	RUNX1T1, ZBTB16, DUSP6, KMT2A, LMO2, PBX3, CDK14, MEIS1, HHEX, ETV1, ETV5, IGF1, TGFBR2, MITF, CEBPB	HPGD, PAX8, TSPAN7
hsa04913	Ovarian steroidogenesis	2.44387	10	0.0218055	0.0218055	PTGS2, IGF1, CYP1B1	ADCY6, PRKACB, INSR, AKR1C3
hsa04620	Toll-like receptor signaling pathway	0.516097	10	0.023494	0.0303846	CTSK, JUN, FOS	RAC1
hsa04928	Parathyroid hormone synthesis, secretion and action	1.45081	10	0.0248665	0.165127	GNAI2, ITPR1, FGFR1, EGR1, NR4A2, JUND, FOS, HBEGF	ADCY6, PRKACB, PLD1
hsa04370	VEGF signaling pathway	1.07911	10	0.0252284	0.0252284	NFATC2, PTGS2, CDC42	PPP3R1, RAC1
hsa04020	Calcium signaling pathway	1.801	10	0.0255657	0.0255657	ATP2B4, ADRB1, PLN, RYR3, AGTR1, EDNRA, AVPR1A, PTGER3, PTGFR, TBXA2R, CXCR4, PDGFRB, ITPR1, MYLK, PDE1A, ITPKB	PRKACB, PLCD3, VDAC1, SLC25A5, PHKB, PPP3R1
hsa05224	Breast cancer	0.927362	10	0.0284948	0.0336586	FOS, JUN, FGF2, FGF7, FGFR1, IGF1, NOTCH3, FZD4, TCF7L1	FRAT2
hsa04630	JAK-STAT signaling pathway	0.841861	10	0.0290684	0.0290684	PDGFB, OSMR, LIFR, PDGFRB, SOCS3, PIAS3, FHL1	IL13RA1, IL20RA, PRLR
hsa04723	Retrograde endocannabinoid signaling	1.43261	10	0.0292543	0.0292543	ITPR1, PTGS2, CNR1, GNAI2, GNAO1, GNB4, GNG7, GNG11	NAPEPLD, ADCY6, PRKACB, NDUFA10, NDUFS1, NDUFS2
hsa04622	RIG-I-like receptor signaling pathway	0.376833	10	0.0308486	0.0308486		MAVS, TRIM25
hsa04720	Long-term potentiation	1.18702	1	0.031735	0.031735	PPP1R1A, RPS6KA2, ITPR1	PRKACB, PPP3R1, RPS6KA6
hsa04360	Axon guidance	1.74318	10	0.0323637	0.0323637	LRRC4C, NFATC2, NFATC4, FYN, CDC42, ENAH, CXCL12, CXCR4, GNAI2, SLIT2, SLIT3, SEMA3G, L1CAM, CFL2, DPYSL2, BOC, PARD6G	PPP3R1, RAC1, ABLIM1, PAK1
hsa04115	p53 signaling pathway	0.872811	10	0.0335549	0.0335549	IGF1	CCNE1, CYCS, CASP3, AIFM2
hsa05131	Shigellosis	0.778376	10	0.0337105	0.0337105	ITGA5, CDC42	RAC1, ARPC4
hsa05203	Viral carcinogenesis	0.79577	10	0.0365405	0.0365405	EGR2, JUN, HDAC9, CDC42, ACTN1, C3	CASP3, CCNE1, PRKACB, HIST1H2BH, RAC1, SCIN
hsa05416	Viral myocarditis	1.3438	10	0.038064	0.038064	FYN, CAV1, DMD	RAC1, CYCS, CASP3
hsa04666	Fc gamma R-mediated phagocytosis	1.41312	10	0.0394189	0.0394189	CDC42, CFL2, ASAP1	PLD1, SCIN, VAV3, ARPC4, RAC1, PAK1, ASAP3
hsa04920	Adipocytokine signaling pathway	0.765822	10	0.0402867	0.0532837	SOCS3, ADIPOQ	G6PC, PPARA
hsa04371	Apelin signaling pathway	1.5827	10	0.0405571	0.0691937	GNAI2, GNB4, GNG7, GNG11, ITPR1, RYR3, MYLK, MRAS, EGR1, NOTCH3, KLF2, ACTA2, CTGF, AGTR1	ADCY6, PRKACB
hsa04917	Prolactin signaling pathway	0.516097	10	0.0420517	0.0556125	FOS, SOCS3	PRLR
hsa00010	Glycolysis / Gluconeogenesis	1.97837	10	0.0445124	0.0445124	ENO2, ADH1B	PDHA1, LDHC, ADH6, ALDH3A2, ALDH7A1, GALM, PGM1, G6PC
hsa05231	Choline metabolism in cancer	1.20205	10	0.0506228	0.0506228	PDGFB, PDGFRB, JUN, FOS	RAC1, PLD1, SLC44A1, SLC44A3
hsa04924	Renin secretion	3.49125	10	0.0508147	0.0508147	ADRB1, ADCYAP1, KCNMA1, PDE1A, GNAI2, EDNRA, AGTR1, ITPR1, GUCY1A2, NPR1, CTSB	ADCY6, PRKACB, PPP3R1, AGT
hsa00020	Citrate cycle (TCA cycle)	2.54362	10	0.0520141	0.0858912		IDH1, SUCLG1, SUCLG2, SDHA, MDH2, PDHA1
hsa00062	Fatty acid elongation	3.12375	10	0.0520141	0.173956	PPT1	ACAA2, HADH, HADHA, ECHS1
hsa04721	Synaptic vesicle cycle	1.07911	10	0.0524489	0.0524489	SYT1, STXBP1, SNAP25, CPLX2	ATP6V1D
hsa05213	Endometrial cancer	0.416499	9	0.0578844	0.0578844	CTNNA2, TCF7L1
hsa04713	Circadian entrainment	1.63216	10	0.0666917	0.0922898	ITPR1, RYR3, GNAI2, GNAO1, GNB4, GNG7, GNG11, GUCY1A2, FOS	ADCY6, PRKACB
hsa04912	GnRH signaling pathway	1.40569	10	0.0717624	0.128765	ITPR1, MAP3K3, CDC42, JUN, HBEGF, EGR1	ADCY6, PRKACB, PLD1
hsa04062	Chemokine signaling pathway	1.1341	10	0.0750499	0.0750499	CXCL12, CX3CL1, CCL2, CXCR4, GNAI2, CDC42, GNB4, GNG7, GNG11, GRK5	ADCY6, PRKACB, VAV3, RAC1, PAK1
hsa04650	Natural killer cell mediated cytotoxicity	0.840371	10	0.0761815	0.115676	ICAM2, FYN, NFATC2	VAV3, RAC1, PAK1, PPP3R1, CASP3
hsa04141	Protein processing in endoplasmic reticulum	0.494593	10	0.0952969	0.124053	BAG2, CRYAB, PPP1R15A	EDEM3, DNAJB12, NGLY1
hsa05323	Rheumatoid arthritis	0.868554	10	0.102133	0.150515	JUN, FOS, CTSK, CCL2, CXCL12	ATP6V1D
hsa04911	Insulin secretion	1.41734	10	0.112458	0.112458	ATP1A2, KCNMA1, KCNMB1, KCNN3, ADCYAP1, SNAP25	ADCY6, PRKACB
hsa04215	Apoptosis - multiple species	0.74189	10	0.121535	0.121535		CASP3, CYCS
hsa05163	Human cytomegalovirus infection	1.15245	10	0.122851	0.122851	CCL2, GNB4, GNG7, GNG11, ITPR1, NFATC2, NFATC4, PTGS2, GNAI2, GNAO1, CX3CL1, PTGER3, CXCL12, CXCR4	RAC1, PPP3R1, ADCY6, PRKACB, CYCS, CASP3
hsa05212	Pancreatic cancer	0.791349	10	0.123948	0.123948	CDC42, TGFBR2	RAC1, RALA, PLD1
hsa05010	Alzheimer disease	1.06301	10	0.124832	0.124832	APBB1, RYR3, ITPR1, SNCA	NDUFA10, NDUFS1, NDUFS2, SDHA, COX5A, PPP3R1, CYCS, CASP3
hsa04931	Insulin resistance	0.856615	10	0.126984	0.19415	RPS6KA2, SOCS3, GFPT2	RPS6KA6, INSR, G6PC, PPARA
hsa04218	Cellular senescence	0.937124	10	0.13712	0.207591	TGFBR2, MRAS, ZFP36L1, NFATC2, NFATC4, ITPR1	CCNE1, RAD50, GATA4, PPP3R1, SLC25A5, VDAC1
hsa05152	Tuberculosis	0.593512	10	0.150898	0.150898	CEBPB, PLK3, C3, MRC2	CASP3, CYCS, CEBPG, PPP3R1
hsa04726	Serotonergic synapse	1.85472	1	0.152905	0.152905	ITPR1, PTGS2, GNAI2, GNAO1, GNB4, GNG7, GNG11, DUSP1, MAOB	DDC, CYP2C9, CYP2C18, PRKACB, CASP3, MAOA
hsa05032	Morphine addiction	1.94884	10	0.155471	0.155471	GABBR1, GNAI2, GNAO1, GNB4, GNG7, GNG11, GRK5, PDE1A, PDE2A	ADCY6, PRKACB
hsa04714	Thermogenesis	0.966182	10	0.155682	0.155682	PRDM16, CNR1, NPR1, FGFR1, RPS6KA2	ADCY6, PRKACB, RPS6KA6, NDUFS1, NDUFS2, NDUFA10, SDHA, COX5A, CPT2
hsa04972	Pancreatic secretion	1.13824	10	0.160768	0.160768	ITPR1, ATP1A2, KCNMA1, ATP2B4	RAB27B, RAC1, ADCY6
hsa05206	MicroRNAs in cancer	1.41115	10	0.166672	0.166672	TIMP3, ZEB2, CYP1B1, RECK, NOTCH3, ITGA5, RDX, ZFPM2, PTGS2, PDGFB, PDGFRB, VIM, FOXP1, FSCN1	CCNE1, HMOX1, CASP3
hsa04728	Dopaminergic synapse	1.47152	5	0.185303	0.240006	ITPR1, FOS, GNAI2, GNAO1, GNB4, GNG7, GNG11, PPP2CA, KIF5A, KIF5C, MAOB	DDC, PRKACB, ARNTL, MAOA
hsa05162	Measles	0.478639	10	0.200669	0.200669	MSN, FYN	MAVS, OAS1, CCNE1
hsa05414	Dilated cardiomyopathy (DCM)	2.3081	10	0.211547	0.211547	ITGA1, ITGA5, ITGA7, ITGA9, DES, DMD, TPM2, ADRB1, CACNA2D1, PLN, IGF1	ITGA2, ADCY6, PRKACB
hsa04152	AMPK signaling pathway	0.962452	10	0.237128	0.237128	ADIPOQ, PPP2CA, IGF1	STRADB, PFKFB2, G6PC, HMGCR, SCD, INSR

## Sheet: CRC - DAVID
Category	Term	Count	%	PValue	Genes	List Total	Pop Hits	Pop Total	Fold Enrichment	Bonferroni	Benjamini	FDR
KEGG_PATHWAY	hsa00280:Valine, leucine and isoleucine degradation	25	1.8546	4.27385e-15	BCAT1, ACADSB, EHHADH, ECHS1, ACAT2, ACAT1, ALDH3A2, HADHA, AUH, MCCC2, MUT, HADH, HMGCL, ACAA2, ALDH6A1, ACADM, ACADS, BCKDHB, ALDH7A1, HMGCS2, ABAT, HIBCH, PCCB, PCCA, ACAA1	538	47	6910	6.83184	1.13065e-12	1.13065e-12	5.54001e-12
KEGG_PATHWAY	hsa00640:Propanoate metabolism	15	1.11276	3.59796e-09	LDHC, ALDH6A1, ACADM, SUCLG2, EHHADH, SUCLG1, ECHS1, ACAT2, ACAT1, HADHA, MUT, ABAT, HIBCH, PCCB, PCCA	538	28	6910	6.88064	9.64252e-07	4.82126e-07	4.72519e-06
KEGG_PATHWAY	hsa00071:Fatty acid degradation	17	1.26113	7.62049e-08	ACAA2, ACOX1, ACADSB, CPT2, ACADM, ACADS, EHHADH, ECHS1, ADH6, ADH1B, ACAT2, ACAT1, HADHA, ALDH3A2, ALDH7A1, HADH, ACAA1	538	44	6910	4.9624	2.04227e-05	6.80761e-06	0.00010008
KEGG_PATHWAY	hsa04510:Focal adhesion	40	2.96736	1.17664e-07	CAV2, CAV1, PDGFB, PPP1R12B, MYL9, CDC42, LAMB2, RAC1, COL6A3, COL6A2, COL6A1, PAK1, THBS2, FN1, COL4A2, VAV3, COL4A1, ITGA1, IGF1, ACTN1, ITGA2, HGF, COL5A2, FLNB, FLNA, VWF, VEGFC, ITGA9, LAMA4, FYN, ITGA5, JUN, ITGA7, COL1A2, PDGFRB, RELN, COL1A1, LAMC1, PARVB, MYLK	538	206	6910	2.49395	3.15335e-05	7.88346e-06	0.000154528
KEGG_PATHWAY	hsa04512:ECM-receptor interaction	22	1.63205	1.98743e-06	COL4A2, COL4A1, ITGA1, ITGA2, COL5A2, HMMR, ITGA9, VWF, LAMA4, LAMB2, ITGA5, COL6A3, ITGA7, COL1A2, COL6A2, COL6A1, RELN, SV2B, COL1A1, LAMC1, THBS2, FN1	538	87	6910	3.24787	0.000532489	0.000106521	0.00261005
KEGG_PATHWAY	hsa01212:Fatty acid metabolism	15	1.11276	1.00508e-05	ACAA2, ACOX1, ACADSB, ACADM, CPT2, ACADS, EHHADH, SCD, ECHS1, PPT1, ACAT2, ACAT1, HADHA, HADH, ACAA1	538	48	6910	4.01371	0.00268999	0.000448835	0.0131988
KEGG_PATHWAY	hsa01130:Biosynthesis of antibiotics	36	2.67062	1.37051e-05	BCAT1, LDHC, HMGCR, EHHADH, ECHS1, ACAT2, ACAT1, HADHA, ALDH3A2, CMBL, GALM, ENO2, IDH1, PDHA1, HADH, PAPSS2, BPNT1, ACAA2, ACADM, SUCLG2, SUCLG1, BCKDHB, SDSL, AK2, SDHA, ALDH7A1, CTH, HMGCS2, GFPT2, PGM1, PHGDH, PCCB, PCCA, MDH2, UGP2, ACAA1	538	212	6910	2.18103	0.00366625	0.000524575	0.0179973
KEGG_PATHWAY	hsa00650:Butanoate metabolism	11	0.816024	1.85505e-05	HMGCS2, ACADS, EHHADH, ECHS1, ABAT, ACAT2, HADH, BDH1, ACAT1, HMGCL, HADHA	538	27	6910	5.23269	0.00495924	0.000621254	0.0243595
KEGG_PATHWAY	hsa04924:Renin secretion	17	1.26113	2.06323e-05	KCNMA1, GNAI2, ADCY6, PPP3R1, NPR1, ITPR1, ADCYAP1, EDNRA, AGTR1, ADRB1, AGT, PDE1A, GUCY1A2, GUCY1A3, GUCY1B3, PRKACB, CTSB	538	64	6910	3.41165	0.00551426	0.000614202	0.027093
KEGG_PATHWAY	hsa00410:beta-Alanine metabolism	11	0.816024	7.33562e-05	ALDH6A1, ALDH7A1, ACADM, SRM, EHHADH, ECHS1, ABAT, HIBCH, ALDH3A2, HADHA, AOC3	538	31	6910	4.5575	0.0194682	0.00196409	0.0962956
KEGG_PATHWAY	hsa01200:Carbon metabolism	22	1.63205	0.000135392	ALDH6A1, ME2, ACADM, SUCLG2, ACADS, EHHADH, SUCLG1, SDSL, ECHS1, ACAT2, ACAT1, HADHA, SDHA, MUT, PHGDH, ENO2, IDH1, HIBCH, PDHA1, PCCB, PCCA, MDH2	538	113	6910	2.50058	0.0356369	0.00329342	0.177664
KEGG_PATHWAY	hsa00380:Tryptophan metabolism	12	0.890208	0.000162744	DDC, ALDH7A1, CYP1B1, EHHADH, MAOA, MAOB, ECHS1, ACAT2, HADH, ACAT1, ALDH3A2, HADHA	538	40	6910	3.85316	0.0426812	0.0036283	0.21352
KEGG_PATHWAY	hsa04022:cGMP-PKG signaling pathway	28	2.07715	0.000171153	KCNMB4, GNAI2, ADCY6, MRVI1, PPP3R1, KCNMB1, MYL9, EDNRA, AGTR1, ATP2B4, GATA4, GUCY1A2, GUCY1A3, NFATC4, NFATC2, INSR, KCNMA1, SLC25A5, NPR1, ATP1A2, ITPR1, VDAC1, ADRB1, PDE2A, RGS2, PLN, GUCY1B3, MYLK	538	166	6910	2.16644	0.0448366	0.00352246	0.224541
KEGG_PATHWAY	hsa04270:Vascular smooth muscle contraction	21	1.55786	0.00076321	KCNMA1, KCNMB4, ACTA2, CALD1, PPP1R12B, ADCY6, MRVI1, NPR1, KCNMB1, ITPR1, MYL9, EDNRA, AGTR1, ACTG2, GUCY1A2, AVPR1A, GUCY1A3, GUCY1B3, PRKACB, MYLK, PLA2G5	538	119	6910	2.26656	0.185042	0.0145093	0.997694
KEGG_PATHWAY	hsa04810:Regulation of actin cytoskeleton	31	2.2997	0.000828368	FGFR1, ENAH, FGF7, PDGFB, MRAS, PPP1R12B, IQGAP2, ABI2, RDX, FGF13, ARPC4, MYL9, CDC42, RAC1, MSN, PAK1, FGF2, FN1, VAV3, ITGA1, ACTN1, ITGA2, ITGA9, ITGA5, CFL2, SCIN, ITGA7, PDGFRB, PIP4K2A, MYLK, PIP4K2B	538	211	6910	1.88701	0.19916	0.0146972	1.08244
KEGG_PATHWAY	hsa05200:Pathways in cancer	49	3.63501	0.000968621	FGF7, PDGFB, PTGS2, MITF, ADCY6, FGF13, LPAR1, GLI3, CXCL12, EDNRA, CDC42, FOS, AGTR1, CCNE1, CASP3, CXCR4, PAX8, RALA, PRKACB, FGF2, GNG7, PTGER3, CYCS, RUNX1T1, CTNNA2, VEGFC, JUN, PDGFRB, GNB4, LAMC1, FGFR1, GNAI2, GNG11, EGLN1, ZBTB16, TCF7L1, LAMB2, RASGRP4, RAC1, FN1, MSH6, COL4A2, COL4A1, TGFBR2, IGF1, ITGA2, HGF, FZD4, LAMA4	538	393	6910	1.6014	0.22873	0.0161012	1.26464
KEGG_PATHWAY	hsa01100:Metabolic pathways	124	9.19881	0.000993108	LDHC, NT5C3A, PTGS2, HMGCR, B3GALT5, EHHADH, PPCS, ADH1B, ITPKB, COX5A, CMBL, FAHD1, ST3GAL3, PTGIS, AGPS, IDS, PHOSPHO2, PDHA1, HADH, BPNT1, HMGCL, ALDH6A1, ACAA2, PLD1, SUCLG2, CMAS, SUCLG1, CDO1, RFK, AKR1B10, PGM1, ABAT, PCCB, PCCA, MDH2, NMNAT1, ACAA1, ACADSB, SRM, ENPP1, CYP2B6, ENPP3, PPT1, ACAT2, ACAT1, HADHA, MUT, GALM, LPCAT1, IDH1, LIAS, GCNT1, MGAT4A, CYP2C9, MAOA, MAOB, AK2, RIMKLB, …	538	1228	6910	1.29694	0.233779	0.0155418	1.29642
KEGG_PATHWAY	hsa04974:Protein digestion and absorption	17	1.26113	0.0010648	COL18A1, COL4A2, COL4A1, SLC38A2, ELN, COL15A1, ATP1A2, COL5A2, COL14A1, COL6A3, COL1A2, ACE2, COL6A2, MEP1B, COL12A1, COL6A1, COL1A1	538	88	6910	2.4812	0.248375	0.015737	1.3894
KEGG_PATHWAY	hsa05205:Proteoglycans in cancer	29	2.15134	0.00155312	FGFR1, CAV2, CAV1, MRAS, LUM, PPP1R12B, RDX, DCN, TIMP3, SDC2, CDC42, CASP3, ANK2, ANK3, RAC1, PRKACB, MSN, PAK1, FGF2, FN1, IGF1, ITGA2, HGF, FLNB, FZD4, FLNA, ITPR1, ITGA5, HBEGF	538	200	6910	1.86236	0.34069	0.0216857	2.02061
KEGG_PATHWAY	hsa04540:Gap junction	16	1.18694	0.00292811	TUBB2B, PDGFB, GNAI2, TUBB2A, ADCY6, LPAR1, ITPR1, TUBB, ADRB1, GUCY1A2, TUBB6, GUCY1A3, PDGFRB, GUCY1B3, PRKACB, TUBA1A	538	88	6910	2.33525	0.544284	0.0385323	3.77791
KEGG_PATHWAY	hsa00072:Synthesis and degradation of ketone bodies	5	0.37092	0.00518555	HMGCS2, ACAT2, BDH1, ACAT1, HMGCL	538	10	6910	6.42193	0.751756	0.0641964	6.6
KEGG_PATHWAY	hsa00920:Sulfur metabolism	5	0.37092	0.00518555	SQRDL, ETHE1, CYCS, BPNT1, PAPSS2	538	10	6910	6.42193	0.751756	0.0641964	6.6
KEGG_PATHWAY	hsa00310:Lysine degradation	11	0.816024	0.00594724	ALDH7A1, KMT2A, PLOD2, EHHADH, SETD7, ECHS1, ACAT2, HADH, ACAT1, ALDH3A2, HADHA	538	52	6910	2.71697	0.797825	0.0700873	7.53483
KEGG_PATHWAY	hsa04151:PI3K-Akt signaling pathway	41	3.04154	0.00643353	FGFR1, FGF7, PDGFB, OSMR, FGF13, GNG11, LPAR1, CCNE1, LAMB2, PPP2CA, RAC1, COL6A3, COL6A2, COL6A1, INSR, FGF2, THBS2, FN1, GNG7, COL4A2, COL4A1, ITGA1, ITGA2, IGF1, NR4A1, HGF, COL5A2, VWF, VEGFC, ITGA9, LAMA4, G6PC, PRLR, ITGA5, ITGA7, COL1A2, PDGFRB, GNB4, RELN, COL1A1, LAMC1	538	345	6910	1.52637	0.822672	0.0724483	8.12712
KEGG_PATHWAY	hsa05412:Arrhythmogenic right ventricular cardiomyopathy (ARVC)	13	0.964392	0.00795254	ITGA9, CACNA2D1, DES, ITGA5, PKP2, DMD, ITGA7, ITGA1, DSC2, ACTN1, ITGA2, TCF7L1, CTNNA2	538	71	6910	2.35169	0.882322	0.0852993	9.95476
KEGG_PATHWAY	hsa04520:Adherens junction	13	0.964392	0.00795254	CDC42, FGFR1, PTPRM, SORBS1, FYN, NLK, TGFBR2, RAC1, ACTN1, INSR, TCF7L1, CTNNA2, FARP2	538	71	6910	2.35169	0.882322	0.0852993	9.95476
KEGG_PATHWAY	hsa04010:MAPK signaling pathway	32	2.37389	0.00798828	FGFR1, FGF7, ZAK, PDGFB, MRAS, DUSP10, PPM1A, PPP3R1, FGF13, CDC42, FOS, CASP3, MAP3K3, RASGRP4, JUND, RAC1, PRKACB, PAK1, FGF2, CACNA2D1, LAMTOR3, NLK, TGFBR2, NR4A1, FLNB, FLNA, RPS6KA6, DUSP1, RPS6KA2, JUN, PDGFRB, DUSP6	538	255	6910	1.61178	0.883452	0.0823858	9.99735
KEGG_PATHWAY	hsa04530:Tight junction	20	1.48368	0.00927509	SHROOM2, OCLN, ZAK, GNAI2, MPDZ, MRAS, MPP5, ACTN1, CASK, CLDN11, PATJ, AMOTL1, MYL9, CTNNA2, CDC42, PPP2CA, MYH11, PARD6G, JAM2, MYH10	538	137	6910	1.87502	0.917695	0.0915822	11.5186
KEGG_PATHWAY	hsa00770:Pantothenate and CoA biosynthesis	6	0.445104	0.0101799	BCAT1, PANK3, ENPP1, ENPP3, PPCS, VNN2	538	18	6910	4.28129	0.93557	0.0965751	12.5739
KEGG_PATHWAY	hsa00620:Pyruvate metabolism	9	0.667656	0.0105343	LDHC, ALDH7A1, ME2, LDHD, PDHA1, ACAT2, ACAT1, ALDH3A2, MDH2	538	40	6910	2.88987	0.941468	0.0963953	12.9842
KEGG_PATHWAY	hsa05414:Dilated cardiomyopathy	14	1.03858	0.0122369	CACNA2D1, ADCY6, ITGA1, ITGA2, IGF1, TPM2, ITGA9, DES, ADRB1, ITGA5, PLN, DMD, ITGA7, PRKACB	538	84	6910	2.14064	0.963107	0.107549	14.9302
KEGG_PATHWAY	hsa03320:PPAR signaling pathway	12	0.890208	0.0133836	PPARA, ACOX1, CPT2, ACADM, SORBS1, EHHADH, SCD, FABP4, GK, DBI, ADIPOQ, ACAA1	538	67	6910	2.30039	0.972976	0.113405	16.2181
KEGG_PATHWAY	hsa00350:Tyrosine metabolism	8	0.593472	0.0163442	FAHD1, DDC, MAOA, MAOB, ADH6, ADH1B, GSTZ1, AOC3	538	35	6910	2.93574	0.987923	0.132783	19.4604
KEGG_PATHWAY	hsa04360:Axon guidance	18	1.33531	0.018622	ABLIM1, GNAI2, PPP3R1, L1CAM, LRRC4C, DPYSL2, CXCL12, SLIT2, SLIT3, CDC42, CXCR4, FYN, SEMA3G, CFL2, RAC1, NFATC4, PAK1, NFATC2	538	127	6910	1.82039	0.993512	0.145663	21.8756
KEGG_PATHWAY	hsa04921:Oxytocin signaling pathway	21	1.55786	0.019999	CACNA2D1, GNAO1, PTGS2, GNAI2, PPP1R12B, ADCY6, PPP3R1, NPR1, ITPR1, MYL9, FOS, RGS2, JUN, RYR3, GUCY1A2, GUCY1A3, NFATC4, GUCY1B3, PRKACB, NFATC2, MYLK	538	158	6910	1.7071	0.995546	0.151311	23.303
KEGG_PATHWAY	hsa04923:Regulation of lipolysis in adipocytes	10	0.74184	0.0273643	PTGER3, ADRB1, GNAI2, PTGS2, ADCY6, ABHD5, NPR1, FABP4, PRKACB, INSR	538	56	6910	2.29355	0.99941	0.196438	30.5375
KEGG_PATHWAY	hsa00340:Histidine metabolism	6	0.445104	0.0289934	DDC, ALDH7A1, HNMT, MAOA, MAOB, ALDH3A2	538	23	6910	3.35057	0.999624	0.201714	32.05
KEGG_PATHWAY	hsa00982:Drug metabolism - cytochrome P450	11	0.816024	0.0360097	FMO5, CYP2B6, CYP2C9, FMO1, MAOA, MAOB, ADH6, ADH1B, UGT2A3, GSTM5, MGST1	538	68	6910	2.07768	0.999946	0.238921	38.223
KEGG_PATHWAY	hsa00500:Starch and sucrose metabolism	7	0.519288	0.0391569	GBA3, G6PC, GANC, ENPP1, ENPP3, PGM1, UGP2	538	33	6910	2.72446	0.999978	0.251231	40.8199
KEGG_PATHWAY	hsa05020:Prion diseases	7	0.519288	0.0391569	NCAM1, EGR1, C7, FYN, PRKACB, LAMC1, PRNP	538	33	6910	2.72446	0.999978	0.251231	40.8199
KEGG_PATHWAY	hsa05130:Pathogenic Escherichia coli infection	9	0.667656	0.0413736	CDC42, TUBB, OCLN, TUBB2B, TUBB2A, FYN, TUBB6, ARPC4, TUBA1A	538	51	6910	2.26656	0.999988	0.257699	42.5881
KEGG_PATHWAY	hsa05012:Parkinson's disease	18	1.33531	0.0480901	SNCAIP, COX7A1, GNAI2, SLC25A5, SNCA, UCHL1, CYCS, NDUFC1, COX5A, NDUFA10, ATP5G3, VDAC1, SDHA, CASP3, PRKACB, LRRK2, NDUFS2, NDUFS1	538	142	6910	1.6281	0.999998	0.287286	47.652
KEGG_PATHWAY	hsa04514:Cell adhesion molecules (CAMs)	18	1.33531	0.0480901	CADM3, PTPRM, OCLN, CADM1, NRXN3, ICAM2, NFASC, L1CAM, LRRC4C, CLDN11, SDC2, NCAM1, ITGA9, CD34, PECAM1, CNTN1, JAM2, NEGR1	538	142	6910	1.6281	0.999998	0.287286	47.652
KEGG_PATHWAY	hsa00590:Arachidonic acid metabolism	10	0.74184	0.0486828	AKR1C3, PTGIS, PTGDS, PTGS2, CYP2B6, CYP2C9, GPX3, CYP4F3, CYP4F2, PLA2G5	538	62	6910	2.07159	0.999998	0.28422	48.0785
KEGG_PATHWAY	hsa00630:Glyoxylate and dicarboxylate metabolism	6	0.445104	0.0539491	MUT, ACAT2, ACAT1, PCCB, PCCA, MDH2	538	27	6910	2.85419	1	0.304074	51.7291
KEGG_PATHWAY	hsa04146:Peroxisome	12	0.890208	0.0552808	PEX11A, FAR2, ACOX1, AGPS, EHHADH, IDH1, PXMP2, ABCD3, HSD17B4, PHYH, HMGCL, ACAA1	538	83	6910	1.85694	1	0.304322	52.6138
KEGG_PATHWAY	hsa04020:Calcium signaling pathway	21	1.55786	0.0623489	PTGER3, SLC25A5, PHKB, PPP3R1, ITPKB, PTGFR, ITPR1, VDAC1, EDNRA, AGTR1, ADRB1, ATP2B4, PLN, RYR3, PDE1A, PLCD3, TBXA2R, AVPR1A, PDGFRB, PRKACB, MYLK	538	179	6910	1.50682	1	0.330508	57.0643
KEGG_PATHWAY	hsa04713:Circadian entrainment	13	0.964392	0.0632035	FOS, GNAO1, GNAI2, RYR3, ADCY6, GUCY1A2, GUCY1A3, GNG11, GNB4, GUCY1B3, PRKACB, ITPR1, GNG7	538	95	6910	1.75758	1	0.328117	57.5754
KEGG_PATHWAY	hsa00270:Cysteine and methionine metabolism	7	0.519288	0.0705852	LDHC, CTH, SRM, SDSL, AHCYL2, CDO1, MDH2	538	38	6910	2.36598	1	0.353348	61.7618
KEGG_PATHWAY	hsa04670:Leukocyte transendothelial migration	15	1.11276	0.0726586	VAV3, OCLN, GNAI2, ACTN1, CLDN11, CXCL12, MYL9, CTNNA2, THY1, CDC42, CXCR4, PECAM1, RAC1, MSN, JAM2	538	118	6910	1.63269	1	0.35563	62.8671
KEGG_PATHWAY	hsa00010:Glycolysis / Gluconeogenesis	10	0.74184	0.0731617	LDHC, GALM, ALDH7A1, G6PC, PGM1, ENO2, ADH6, ADH1B, PDHA1, ALDH3A2	538	67	6910	1.91699	1	0.351586	63.1308
KEGG_PATHWAY	hsa00260:Glycine, serine and threonine metabolism	7	0.519288	0.0782174	ALDH7A1, CTH, MAOA, MAOB, PHGDH, SDSL, AOC3	538	39	6910	2.30531	1	0.365387	65.6863
KEGG_PATHWAY	hsa00052:Galactose metabolism	6	0.445104	0.0788441	GALM, G6PC, GANC, AKR1B10, PGM1, UGP2	538	30	6910	2.56877	1	0.361848	65.9915
KEGG_PATHWAY	hsa00020:Citrate cycle (TCA cycle)	6	0.445104	0.0788441	SDHA, SUCLG2, SUCLG1, IDH1, PDHA1, MDH2	538	30	6910	2.56877	1	0.361848	65.9915
KEGG_PATHWAY	hsa05144:Malaria	8	0.593472	0.0825143	GYPC, CCL2, PECAM1, CD81, ACKR1, HGF, THBS2, SDC2	538	49	6910	2.09696	1	0.369722	67.7286
KEGG_PATHWAY	hsa04610:Complement and coagulation cascades	10	0.74184	0.0847562	C7, VWF, A2M, THBD, C3, F8, TFPI, SERPING1, C1R, C1S	538	69	6910	1.86143	1	0.372116	68.749
KEGG_PATHWAY	hsa00900:Terpenoid backbone biosynthesis	5	0.37092	0.0862785	HMGCS2, HMGCR, ACAT2, ACAT1, PDSS2	538	22	6910	2.91906	1	0.371883	69.4248
KEGG_PATHWAY	hsa04024:cAMP signaling pathway	22	1.63205	0.0883061	FXYD1, ACOX1, PPARA, PLD1, VAV3, PTGER3, GNAI2, ADCY6, GABBR1, NPR1, ATP1A2, GLI3, MYL9, EDNRA, FOS, ADRB1, ATP2B4, JUN, PLN, RAC1, PAK1, PRKACB	538	198	6910	1.4271	1	0.373426	70.3039
KEGG_PATHWAY	hsa04726:Serotonergic synapse	14	1.03858	0.088341	DDC, GNAO1, PTGS2, GNAI2, CYP2C18, CYP2C9, MAOA, MAOB, GNG11, ITPR1, CASP3, GNB4, PRKACB, GNG7	538	111	6910	1.61995	1	0.368098	70.3189
KEGG_PATHWAY	hsa05014:Amyotrophic lateral sclerosis (ALS)	8	0.593472	0.0898727	PRPH, CASP3, CYCS, RAC1, PPP3R1, NEFH, NEFL, NEFM	538	50	6910	2.05502	1	0.368002	70.9671

## Sheet: CRC - SPIA
Name	ID	pSize	NDE	pNDE	tA	pPERT	pG	pGFdr	pGFWER	Status	KEGGLINK
Focal adhesion	4510	197	39	3.49679e-10	69.7955	0.002	2.02734e-11	2.61527e-09	2.61527e-09	Activated	http://www.genome.jp/dbget-bin/show_pathway?hsa04510+3672+3673+3678+3679+3680+2316+2317+998+4638+10398+29780+87+2534+1277+1278+1282+1284+1290+1291+1292+1293+2335+3910+3913+3915+5649+7058+7450+857+858+5159+3082+3479+5155+7424+3725+5058+5879+10451
ECM-receptor interaction	4512	82	23	1.35388e-09	15.5136	0.009	3.18403e-10	2.0537e-08	4.10739e-08	Activated	http://www.genome.jp/dbget-bin/show_pathway?hsa04512+3910+3913+3915+1277+1278+1282+1284+1290+1291+1292+1293+7450+2335+7058+3161+9899+6383+3680+3679+3678+3672+5649+3673
Vascular smooth muscle contraction	4270	108	22	1.43388e-06	0.169587	0.992	2.05725e-05	0.000884616	0.00265385	Activated	http://www.genome.jp/dbget-bin/show_pathway?hsa04270+4638+10398+4660+59+72+3708+27345+3778+3779+5322+800+4881+112+5567+2977+2982+2983+185+1909+552+4629+10335
Regulation of actin cytoskeleton	4810	210	31	1.58476e-05	7.36538	0.643	0.000127315	0.00410591	0.0164236	Activated	http://www.genome.jp/dbget-bin/show_pathway?hsa04810+10093+10152+1073+85477+5305+8396+87+4478+5962+10398+4638+55740+5058+998+5879+10788+10451+3672+3673+3678+3679+3680+2335+22808+2260+5159+2247+2252+2258+5155+4628
MAPK signaling pathway	4010	256	35	2.51393e-05	6.1373	0.523	0.00016092	0.00415174	0.0207587	Activated	http://www.genome.jp/dbget-bin/show_pathway?hsa04010+11221+1843+1848+5322+8649+5567+22808+115727+5159+2260+781+5155+2247+2252+2258+3164+51701+5494+51776+836+7048+5879+998+5058+4215+3727+3725+4776+4773+5534+2316+2317+2353+27330+6196
Pathways in cancer	5200	319	37	0.000464307	53.0703	0.037	0.000205668	0.00442186	0.0265312	Activated	http://www.genome.jp/dbget-bin/show_pathway?hsa05200+836+1496+1282+1284+2335+3910+3913+3915+3673+8322+5159+2260+3082+5155+3479+5898+5879+5337+998+3725+2353+83439+54583+54205+7048+2956+7849+7704+862+4286+898+5743+7424+2737+2247+2252+2258
Dilated cardiomyopathy	5414	88	14	0.00156873	-3.99705	0.03	0.000515988	0.00950892	0.0665624	Inhibited	http://www.genome.jp/dbget-bin/show_pathway?hsa05414+781+3672+3673+3678+3679+3680+7169+1756+1674+153+112+5567+5350+3479
Gap junction	4540	85	16	0.000103213	7.45049	0.54	0.000601656	0.0097017	0.0776136	Activated	http://www.genome.jp/dbget-bin/show_pathway?hsa04540+2771+1902+5567+203068+347733+7280+84617+112+7846+2977+2982+2983+5159+5155+153+3708
PPAR signaling pathway	3320	68	13	0.000383645	-1.00199	0.315	0.00121102	0.015731	0.156221	Inhibited	http://www.genome.jp/dbget-bin/show_pathway?hsa03320+2710+2167+5465+30+34+1962+1376+3158+10580+51+9370+6319+1622
Pathogenic Escherichia coli infection	5130	50	9	0.00451053	22.8944	0.027	0.00121946	0.015731	0.15731	Activated	http://www.genome.jp/dbget-bin/show_pathway?hsa05130+7846+100506658+998+2534+203068+347733+7280+84617+10093
Parkinson's disease	5012	116	16	0.00343462	-9.69813	0.069	0.00221525	0.0259789	0.285768	Inhibited	http://www.genome.jp/dbget-bin/show_pathway?hsa05012+120892+9627+6622+7345+54205+4705+4717+4719+4720+6389+1346+9377+518+292+7416+836
Tight junction	4530	130	19	0.000746654	4.62115	0.366	0.00251551	0.0270417	0.324501	Activated	http://www.genome.jp/dbget-bin/show_pathway?hsa04530+58494+5515+100506658+5010+84552+1496+8777+10398+4628+4629+22808+2771+51776+10207+998+87+8573+154810+64398
Axon guidance	4360	129	18	0.00174079	10.0808	0.222	0.00342342	0.0339708	0.441621	Activated	http://www.genome.jp/dbget-bin/show_pathway?hsa04360+2771+7852+5879+4773+4776+5534+3983+6586+9353+2534+998+5058+1808+57689+56920+3897+1073+6387
Arrhythmogenic right ventricular cardiomyopathy (ARVC)	5412	72	13	0.000681045	0	1	0.00564715	0.0520344	0.728482	Inhibited	http://www.genome.jp/dbget-bin/show_pathway?hsa05412+781+1756+1824+5318+3672+3673+3678+3679+3680+1674+1496+87+83439
Malaria	5144	47	8	0.0101832	-1.90085	0.084	0.00689784	0.0574192	0.889822	Inhibited	http://www.genome.jp/dbget-bin/show_pathway?hsa05144+3082+6383+975+2532+2995+5175+6347+7058
Calcium signaling pathway	4020	178	21	0.00595419	13.5724	0.149	0.00712177	0.0574192	0.918708	Activated	http://www.genome.jp/dbget-bin/show_pathway?hsa04020+3707+5136+7416+5534+5159+4638+113026+3708+5257+6263+185+1909+552+5733+5737+6915+292+153+5350+5567+493
Serotonergic synapse	4726	114	16	0.00287797	-5.01627	0.374	0.00843239	0.0639869	1	Inhibited	http://www.genome.jp/dbget-bin/show_pathway?hsa04726+5567+3708+1644+2771+2775+2788+2791+59345+4128+4129+5322+1559+1562+5743+836+1843
Wnt signaling pathway	4310	147	16	0.0297668	-14.5024	0.042	0.00960715	0.0688513	1	Inhibited	http://www.genome.jp/dbget-bin/show_pathway?hsa04310+4773+4776+5534+8322+5879+23500+3725+64321+83439+51701+79718+5515+5567+23401+6422+6423
Prion diseases	5020	34	7	0.00552437	5.48206	0.373	0.0148048	0.100517	1	Activated	http://www.genome.jp/dbget-bin/show_pathway?hsa05020+5621+4684+3915+5567+2534+1958+730
Amphetamine addiction	5031	68	8	0.0732059	-9.35114	0.034	0.0174127	0.107609	1	Inhibited	http://www.genome.jp/dbget-bin/show_pathway?hsa05031+4128+4129+1644+5567+5534+2353+2354+3725
Renal cell carcinoma	5211	69	8	0.0783289	-10.3341	0.032	0.0175177	0.107609	1	Inhibited	http://www.genome.jp/dbget-bin/show_pathway?hsa05211+7424+54583+5155+5879+5058+998+3725+3082
Glutamatergic synapse	4724	119	13	0.0456886	-8.33999	0.059	0.0186433	0.109317	1	Inhibited	http://www.genome.jp/dbget-bin/show_pathway?hsa04724+112+54407+57030+5567+3708+2771+2775+2788+2791+59345+5534+5322+5337
Small cell lung cancer	5222	83	10	0.0425667	17.3069	0.075	0.0215397	0.120809	1	Activated	http://www.genome.jp/dbget-bin/show_pathway?hsa05222+898+3673+54205+1282+1284+2335+3910+3913+3915+5743
GABAergic synapse	4727	87	10	0.0556745	-4.87112	0.074	0.0267462	0.14134	1	Inhibited	http://www.genome.jp/dbget-bin/show_pathway?hsa04727+2550+112+2771+2775+2788+2791+59345+18+5567+54407
Fc gamma R-mediated phagocytosis	4666	92	11	0.0362198	-13.6884	0.117	0.0273915	0.14134	1	Inhibited	http://www.genome.jp/dbget-bin/show_pathway?hsa04666+10451+5879+10093+998+5337+5058+1073+50807+55616+85477+8613
Melanoma	5218	71	9	0.0400363	25.1895	0.117	0.0298084	0.147249	1	Activated	http://www.genome.jp/dbget-bin/show_pathway?hsa05218+4286+2260+5159+2247+2252+2258+3082+3479+5155
Retrograde endocannabinoid signaling	4723	100	12	0.028837	3.26444	0.169	0.0308195	0.147249	1	Activated	http://www.genome.jp/dbget-bin/show_pathway?hsa04723+57030+3708+5743+1268+2771+2775+2788+2791+59345+112+5567+222236
Bile secretion	4976	70	7	0.168984	-3.44791	0.036	0.0371221	0.167771	1	Inhibited	http://www.genome.jp/dbget-bin/show_pathway?hsa04976+477+112+5567+9971+200931+9429+3156
Leukocyte transendothelial migration	4670	113	15	0.00647887	0.0743296	0.996	0.0389966	0.167771	1	Activated	http://www.genome.jp/dbget-bin/show_pathway?hsa04670+100506658+5010+5175+58494+10398+1496+5879+10451+4478+6387+7852+2771+7070+998+87
Bacterial invasion of epithelial cells	5100	69	10	0.0133684	9.10788	0.483	0.0390166	0.167771	1	Activated	http://www.genome.jp/dbget-bin/show_pathway?hsa05100+1496+5879+998+3678+10093+23607+2335+857+858+26084
Colorectal cancer	5210	62	8	0.0468188	5.50249	0.153	0.0425412	0.177026	1	Activated	http://www.genome.jp/dbget-bin/show_pathway?hsa05210+836+5879+3725+2353+54205+83439+2956+7048
Amyotrophic lateral sclerosis (ALS)	5014	52	8	0.0183278	-3.11312	0.471	0.0496556	0.200174	1	Inhibited	http://www.genome.jp/dbget-bin/show_pathway?hsa05014+54205+836+4747+4741+4744+5630+5879+5534
Complement and coagulation cascades	4610	67	10	0.0109545	2.28354	0.848	0.0527534	0.206218	1	Activated	http://www.genome.jp/dbget-bin/show_pathway?hsa04610+7056+2+7035+7450+2157+718+730+710+716+715
Cholinergic synapse	4725	109	12	0.0508709	12.6958	0.201	0.0570856	0.21659	1	Activated	http://www.genome.jp/dbget-bin/show_pathway?hsa04725+1136+43+112+5567+3708+2771+2775+2788+2791+59345+2353+2534
Pertussis	5133	68	10	0.0121162	-0.728151	0.923	0.0614333	0.226426	1	Inhibited	http://www.genome.jp/dbget-bin/show_pathway?hsa05133+2771+3678+1073+836+715+716+710+718+2353+3725
Salivary secretion	4970	80	11	0.0142157	0.735555	0.85	0.0654426	0.234503	1	Activated	http://www.genome.jp/dbget-bin/show_pathway?hsa04970+153+112+5567+3708+493+6263+2977+2982+2983+3778+477
Dopaminergic synapse	4728	127	15	0.0180255	-0.0341196	0.992	0.0898357	0.310528	1	Inhibited	http://www.genome.jp/dbget-bin/show_pathway?hsa04728+5567+3708+1644+4128+4129+2771+2775+2788+2791+59345+2353+5515+3798+3800+406
Cocaine addiction	5030	50	7	0.0418523	3.27106	0.437	0.0914734	0.310528	1	Activated	http://www.genome.jp/dbget-bin/show_pathway?hsa05030+4128+4129+1644+5567+2771+3725+2354
Long-term depression	4730	64	9	0.0220857	1.16299	0.887	0.0966324	0.31963	1	Activated	http://www.genome.jp/dbget-bin/show_pathway?hsa04730+5322+2771+2775+3479+2977+2982+2983+5515+3708
Morphine addiction	5032	89	11	0.0292935	1.44244	0.717	0.102141	0.329405	1	Activated	http://www.genome.jp/dbget-bin/show_pathway?hsa05032+112+5567+2771+2775+2788+2791+59345+5136+5138+2550+2869
Transcriptional misregulation in cancer	5202	165	18	0.0216971	0	1	0.104809	0.329766	1	Inhibited	http://www.genome.jp/dbget-bin/show_pathway?hsa05202+2115+5155+7102+7048+3479+1051+7849+2119+862+7704+4297+4005+5090+5218+1848+4211+3248+3087
Vibrio cholerae infection	5110	52	3	0.666175	-2.06882	0.036	0.113447	0.348444	1	Inhibited	http://www.genome.jp/dbget-bin/show_pathway?hsa05110+51382+30001+5567
Alzheimer's disease	5010	157	15	0.0869599	-4.03798	0.299	0.120895	0.362684	1	Inhibited	http://www.genome.jp/dbget-bin/show_pathway?hsa05010+836+54205+4705+4717+4719+4720+6389+518+1346+9377+6263+3708+5534+322+6622
Staphylococcus aureus infection	5150	49	3	0.626059	12.1542	0.05	0.139738	0.409686	1	Activated	http://www.genome.jp/dbget-bin/show_pathway?hsa05150+718+716+715
Viral myocarditis	5416	66	8	0.0635853	-0.967707	0.55	0.15224	0.418727	1	Inhibited	http://www.genome.jp/dbget-bin/show_pathway?hsa05416+1756+54205+836+4628+4629+2534+857+5879
Osteoclast differentiation	4380	131	14	0.0457799	-2.29558	0.78	0.154702	0.418727	1	Inhibited	http://www.genome.jp/dbget-bin/show_pathway?hsa04380+2534+2353+2354+3725+3726+3727+5534+1513+4286+4773+9021+7048+5879+140885
Amoebiasis	5146	106	12	0.0425468	-0.834731	0.843	0.15523	0.418727	1	Inhibited	http://www.genome.jp/dbget-bin/show_pathway?hsa05146+2335+3910+3913+3915+836+5567+1277+1278+1282+1284+1290+87
Systemic lupus erythematosus	5322	97	7	0.444937	5.15639	0.081	0.155805	0.418727	1	Activated	http://www.genome.jp/dbget-bin/show_pathway?hsa05322+718+716+715+730+8345+6738+87
Jak-STAT signaling pathway	4630	152	7	0.871955	-4.89396	0.053	0.188297	0.494422	1	Inhibited	http://www.genome.jp/dbget-bin/show_pathway?hsa04630+9021+10401+3597+3977+53832+5618+9180
Huntington's disease	5016	172	14	0.229632	-1.73445	0.206	0.191636	0.494422	1	Inhibited	http://www.genome.jp/dbget-bin/show_pathway?hsa05016+4705+4717+4719+4720+6389+1346+9377+518+23186+3708+292+7416+54205+836
B cell receptor signaling pathway	4662	76	8	0.119973	-4.24644	0.411	0.197711	0.500094	1	Inhibited	http://www.genome.jp/dbget-bin/show_pathway?hsa04662+10451+975+2353+3725+4773+4776+5534+5879
Salmonella infection	5132	79	9	0.0703291	-1.63294	0.779	0.213903	0.524758	1	Inhibited	http://www.genome.jp/dbget-bin/show_pathway?hsa05132+5879+998+10093+2353+3725+2316+2317+3831+4628
Type II diabetes mellitus	4930	46	3	0.582748	-7.26886	0.098	0.220601	0.524758	1	Inhibited	http://www.genome.jp/dbget-bin/show_pathway?hsa04930+3643+9021+9370
GnRH signaling pathway	4912	92	9	0.143568	10.1448	0.399	0.221099	0.524758	1	Activated	http://www.genome.jp/dbget-bin/show_pathway?hsa04912+112+998+4215+5322+3708+5337+5567+1839+3725
RIG-I-like receptor signaling pathway	4622	69	2	0.94429	-4.24457	0.063	0.227368	0.524758	1	Inhibited	http://www.genome.jp/dbget-bin/show_pathway?hsa04622+7706+57506
Hedgehog signaling pathway	4340	53	4	0.455297	-7.11201	0.131	0.227802	0.524758	1	Inhibited	http://www.genome.jp/dbget-bin/show_pathway?hsa04340+5567+2737+51715+2619
Epithelial cell signaling in Helicobacter pylori infection	5120	67	8	0.0682915	-0.0506767	0.994	0.250483	0.552503	1	Inhibited	http://www.genome.jp/dbget-bin/show_pathway?hsa05120+3725+51382+836+5058+998+5879+58494+1839
Phosphatidylinositol signaling system	4070	78	6	0.397275	1.38995	0.171	0.250623	0.552503	1	Activated	http://www.genome.jp/dbget-bin/show_pathway?hsa04070+113026+3708+5305+8396+4534+3707
Insulin signaling pathway	4910	135	8	0.657887	-21.7197	0.105	0.253691	0.552503	1	Inhibited	http://www.genome.jp/dbget-bin/show_pathway?hsa04910+9021+5257+5567+5577+3643+2538+10580+23433
Protein processing in endoplasmic reticulum	4141	160	7	0.902123	-4.41292	0.078	0.257119	0.552503	1	Inhibited	http://www.genome.jp/dbget-bin/show_pathway?hsa04141+23645+80267+30001+55768+54788+9532+1410
Gastric acid secretion	4971	71	6	0.314884	-2.81637	0.229	0.261724	0.552503	1	Inhibited	http://www.genome.jp/dbget-bin/show_pathway?hsa04971+112+5567+3708+477+2771+4638
Fc epsilon RI signaling pathway	4664	73	4	0.707374	-10.0306	0.104	0.265544	0.552503	1	Inhibited	http://www.genome.jp/dbget-bin/show_pathway?hsa04664+2534+5322+5879+10451
Chemokine signaling pathway	4062	181	15	0.200305	10.827	0.409	0.286897	0.587456	1	Activated	http://www.genome.jp/dbget-bin/show_pathway?hsa04062+7852+6347+6376+6387+2771+2788+2791+59345+2869+10451+998+112+5567+5058+5879
Prostate cancer	5215	89	6	0.524496	12.7608	0.164	0.297036	0.598713	1	Activated	http://www.genome.jp/dbget-bin/show_pathway?hsa05215+83439+2260+5159+898+3479+5155
Cytosolic DNA-sensing pathway	4623	57	1	0.978481	-0.991831	0.099	0.323001	0.641033	1	Inhibited	http://www.genome.jp/dbget-bin/show_pathway?hsa04623+57506
T cell receptor signaling pathway	4660	108	9	0.26934	-4.42055	0.416	0.357296	0.698351	1	Inhibited	http://www.genome.jp/dbget-bin/show_pathway?hsa04660+2353+3725+4773+4776+5534+10451+998+5058+2534
VEGF signaling pathway	4370	71	7	0.17771	2.05292	0.743	0.399372	0.76894	1	Activated	http://www.genome.jp/dbget-bin/show_pathway?hsa04370+998+5743+5322+5534+4773+4776+5879
Vasopressin-regulated water reabsorption	4962	44	3	0.55216	-1.62019	0.255	0.416828	0.790747	1	Inhibited	http://www.genome.jp/dbget-bin/show_pathway?hsa04962+112+5567+397
Oocyte meiosis	4114	108	10	0.164567	1.46723	0.878	0.424011	0.792717	1	Activated	http://www.genome.jp/dbget-bin/show_pathway?hsa04114+27330+6196+898+3708+5534+64506+5567+112+5515+3479
Legionellosis	5134	51	4	0.425833	-1.73445	0.356	0.437589	0.806159	1	Inhibited	http://www.genome.jp/dbget-bin/show_pathway?hsa05134+664+54205+836+718
Glioma	5214	63	3	0.786064	9.20224	0.197	0.4437	0.806159	1	Activated	http://www.genome.jp/dbget-bin/show_pathway?hsa05214+5155+3479+5159
Pancreatic cancer	5212	69	6	0.29178	-2.96836	0.588	0.474001	0.840618	1	Inhibited	http://www.genome.jp/dbget-bin/show_pathway?hsa05212+5879+5898+5337+7424+998+7048
Herpes simplex infection	5168	172	11	0.567536	-5.2709	0.304	0.475698	0.840618	1	Inhibited	http://www.genome.jp/dbget-bin/show_pathway?hsa05168+2353+3725+718+6347+57506+406+51616+4938+9021+836+54205
Adipocytokine signaling pathway	4920	68	4	0.653214	3.75939	0.276	0.489156	0.843504	1	Activated	http://www.genome.jp/dbget-bin/show_pathway?hsa04920+9021+2538+9370+5465
Alcoholism	5034	143	12	0.220487	2.37013	0.821	0.49041	0.843504	1	Activated	http://www.genome.jp/dbget-bin/show_pathway?hsa05034+4128+4129+1644+9734+2771+2775+2788+2791+59345+2030+2354+8345
Progesterone-mediated oocyte maturation	4914	84	7	0.305114	-1.76443	0.622	0.505175	0.857467	1	Inhibited	http://www.genome.jp/dbget-bin/show_pathway?hsa04914+3479+64506+112+5567+27330+6196+2771
HTLV-I infection	5166	255	20	0.223285	1.26823	0.87	0.512563	0.858709	1	Activated	http://www.genome.jp/dbget-bin/show_pathway?hsa05166+4773+4776+5534+22808+292+7416+112+5567+467+7048+4215+3725+5159+5155+8322+2353+1958+1959+64784+7538
Hepatitis C	5160	127	8	0.588998	-3.62509	0.352	0.533548	0.869732	1	Inhibited	http://www.genome.jp/dbget-bin/show_pathway?hsa05160+57506+975+5010+100506658+9021+5515+4938+5465
Aldosterone-regulated sodium reabsorption	4960	38	3	0.453053	1.42662	0.468	0.540892	0.869732	1	Activated	http://www.genome.jp/dbget-bin/show_pathway?hsa04960+477+3643+3479
Olfactory transduction	4740	112	2	0.995366	-5.3608	0.221	0.553072	0.869732	1	Inhibited	http://www.genome.jp/dbget-bin/show_pathway?hsa04740+5567+282763
p53 signaling pathway	4115	67	4	0.641614	-1.73445	0.343	0.55322	0.869732	1	Inhibited	http://www.genome.jp/dbget-bin/show_pathway?hsa04115+898+3479+54205+836
Apoptosis	4210	86	5	0.665532	-5.89854	0.337	0.559554	0.869732	1	Inhibited	http://www.genome.jp/dbget-bin/show_pathway?hsa04210+5534+836+5567+5577+54205
Neurotrophin signaling pathway	4722	117	7	0.644575	7.14388	0.348	0.559595	0.869732	1	Activated	http://www.genome.jp/dbget-bin/show_pathway?hsa04722+27330+6196+3725+4215+397+998+5879
Pancreatic secretion	4972	90	8	0.230489	0	1	0.568743	0.873427	1	Inhibited	http://www.genome.jp/dbget-bin/show_pathway?hsa04972+3708+493+3778+477+5322+112+5874+5879
Shigellosis	5131	59	4	0.540113	3.15706	0.436	0.576028	0.874207	1	Activated	http://www.genome.jp/dbget-bin/show_pathway?hsa05131+5879+998+10093+3678
TGF-beta signaling pathway	4350	81	6	0.432636	3.34309	0.574	0.594257	0.891386	1	Activated	http://www.genome.jp/dbget-bin/show_pathway?hsa04350+7058+130399+3400+5515+7048+1634
Circadian rhythm - mammal	4710	20	2	0.377051	-1.21453	0.686	0.608427	0.899458	1	Inhibited	http://www.genome.jp/dbget-bin/show_pathway?hsa04710+8553+406
Antigen processing and presentation	4612	65	1	0.987455	0.786019	0.271	0.620367	0.899458	1	Activated	http://www.genome.jp/dbget-bin/show_pathway?hsa04612+1508
Long-term potentiation	4720	68	6	0.28036	0.633973	0.955	0.620556	0.899458	1	Activated	http://www.genome.jp/dbget-bin/show_pathway?hsa04720+5534+27330+6196+5567+5502+3708
Toxoplasmosis	5145	121	8	0.53327	3.16322	0.575	0.669102	0.937327	1	Activated	http://www.genome.jp/dbget-bin/show_pathway?hsa05145+2771+2775+54205+836+5322+3910+3913+3915
Cytokine-cytokine receptor interaction	4060	250	16	0.563765	3.20427	0.55	0.673149	0.937327	1	Activated	http://www.genome.jp/dbget-bin/show_pathway?hsa04060+3977+7048+944+53832+5159+3082+7424+5155+5618+3597+9180+6347+7852+6376+6387+57007
Chagas disease (American trypanosomiasis)	5142	101	8	0.33499	0.666557	0.928	0.674085	0.937327	1	Activated	http://www.genome.jp/dbget-bin/show_pathway?hsa05142+718+2353+3725+7048+2771+2775+5515+6347
Acute myeloid leukemia	5221	56	3	0.714636	2.44549	0.437	0.675747	0.937327	1	Activated	http://www.genome.jp/dbget-bin/show_pathway?hsa05221+7704+862+83439
Toll-like receptor signaling pathway	4620	97	4	0.883221	5.16785	0.384	0.705885	0.968714	1	Activated	http://www.genome.jp/dbget-bin/show_pathway?hsa04620+5879+2353+3725+1513
Natural killer cell mediated cytotoxicity	4650	128	9	0.454384	-4.49543	0.799	0.7309	0.98728	1	Inhibited	http://www.genome.jp/dbget-bin/show_pathway?hsa04650+4773+4776+5534+2534+836+3384+5058+5879+10451
Thyroid cancer	5216	29	2	0.571021	1.31755	0.651	0.739594	0.98728	1	Activated	http://www.genome.jp/dbget-bin/show_pathway?hsa05216+7849+83439
Mineral absorption	4978	48	4	0.380952	0	1	0.748601	0.98728	1	Inhibited	http://www.genome.jp/dbget-bin/show_pathway?hsa04978+79901+3162+477+140803
Cell cycle	4110	122	4	0.960884	4.46777	0.398	0.750027	0.98728	1	Activated	http://www.genome.jp/dbget-bin/show_pathway?hsa04110+4999+8555+1028+898
Basal cell carcinoma	5217	52	3	0.666175	3.75691	0.598	0.765022	0.996846	1	Activated	http://www.genome.jp/dbget-bin/show_pathway?hsa05217+2737+8322+83439
Melanogenesis	4916	96	7	0.434178	0.173466	0.988	0.792035	1	1	Activated	http://www.genome.jp/dbget-bin/show_pathway?hsa04916+4286+5567+2771+2775+8322+83439+112
ErbB signaling pathway	4012	87	3	0.928037	5.8077	0.468	0.796533	1	1	Activated	http://www.genome.jp/dbget-bin/show_pathway?hsa04012+5058+1839+3725
Dorso-ventral axis formation	4320	23	2	0.446483	0	1	0.806506	1	1	Inhibited	http://www.genome.jp/dbget-bin/show_pathway?hsa04320+64506+4854
mTOR signaling pathway	4150	62	4	0.579913	-4.16334e-17	0.792	0.816652	1	1	Inhibited	http://www.genome.jp/dbget-bin/show_pathway?hsa04150+7424+27330+6196+3479
Rheumatoid arthritis	5323	84	6	0.46763	0	1	0.823065	1	1	Inhibited	http://www.genome.jp/dbget-bin/show_pathway?hsa05323+51382+1513+6387+2353+3725+6347
Endocrine and other factor-regulated calcium reabsorption	4961	48	3	0.611973	0.58657	0.837	0.854896	1	1	Activated	http://www.genome.jp/dbget-bin/show_pathway?hsa04961+5567+112+477
Taste transduction	4742	44	3	0.55216	-0.372879	0.934	0.857224	1	1	Inhibited	http://www.genome.jp/dbget-bin/show_pathway?hsa04742+5567+5136+112
Neuroactive ligand-receptor interaction	4080	263	17	0.546678	0	1	0.876814	1	1	Inhibited	http://www.genome.jp/dbget-bin/show_pathway?hsa04080+5618+2894+2550+1901+1903+1902+1268+9934+6915+5737+5733+552+4887+1909+185+153+1136
Viral carcinogenesis	5203	190	12	0.584433	0	1	0.89834	1	1	Inhibited	http://www.genome.jp/dbget-bin/show_pathway?hsa05203+3725+836+1959+898+9734+998+5879+85477+87+718+5567+8345
Endometrial cancer	5213	52	2	0.860506	1.31755	0.691	0.903717	1	1	Activated	http://www.genome.jp/dbget-bin/show_pathway?hsa05213+1496+83439
Chronic myeloid leukemia	5220	72	1	0.992178	0.972841	0.618	0.913078	1	1	Activated	http://www.genome.jp/dbget-bin/show_pathway?hsa05220+7048
Notch signaling pathway	4330	46	2	0.809913	1.71715	0.761	0.914624	1	1	Activated	http://www.genome.jp/dbget-bin/show_pathway?hsa04330+196403+4854
Leishmaniasis	5140	68	4	0.653214	-0.32913	0.973	0.923635	1	1	Inhibited	http://www.genome.jp/dbget-bin/show_pathway?hsa05140+718+2353+3725+5743
Lysosome	4142	116	7	0.635603	0	1	0.923646	1	1	Inhibited	http://www.genome.jp/dbget-bin/show_pathway?hsa04142+1508+1513+1515+3423+5538+8905+8907
Influenza A	5164	159	8	0.819068	0.959677	0.829	0.941867	1	1	Activated	http://www.genome.jp/dbget-bin/show_pathway?hsa05164+57506+7706+3725+4938+9021+7416+54205+6347
Carbohydrate digestion and absorption	4973	37	2	0.70347	0	1	0.950902	1	1	Inhibited	http://www.genome.jp/dbget-bin/show_pathway?hsa04973+477+2538
Tuberculosis	5152	170	8	0.870011	-1.1561	0.858	0.964738	1	1	Inhibited	http://www.genome.jp/dbget-bin/show_pathway?hsa05152+9902+5534+1051+1054+836+54205+1263+718
Intestinal immune network for IgA production	4672	45	2	0.800036	0	1	0.978523	1	1	Inhibited	http://www.genome.jp/dbget-bin/show_pathway?hsa04672+6387+7852
Maturity onset diabetes of the young	4950	24	1	0.801112	0	1	0.978762	1	1	Inhibited	http://www.genome.jp/dbget-bin/show_pathway?hsa04950+3087
Measles	5162	127	5	0.921971	0.48002	0.886	0.982102	1	1	Activated	http://www.genome.jp/dbget-bin/show_pathway?hsa05162+57506+4938+4478+2534+898
NF-kappa B signaling pathway	4064	88	3	0.931419	-1.10873	0.885	0.983573	1	1	Inhibited	http://www.genome.jp/dbget-bin/show_pathway?hsa04064+6387+7706+5743
Phototransduction	4744	27	1	0.837492	0	1	0.986016	1	1	Inhibited	http://www.genome.jp/dbget-bin/show_pathway?hsa04744+5145
African trypanosomiasis	5143	32	1	0.883955	0	1	0.99299	1	1	Inhibited	http://www.genome.jp/dbget-bin/show_pathway?hsa05143+3910
SNARE interactions in vesicular transport	4130	36	1	0.911366	0	1	0.995951	1	1	Inhibited	http://www.genome.jp/dbget-bin/show_pathway?hsa04130+6616
Bladder cancer	5219	41	1	0.936718	0	1	0.997954	1	1	Inhibited	http://www.genome.jp/dbget-bin/show_pathway?hsa05219+7424
RNA degradation	3018	68	2	0.941118	0	1	0.998231	1	1	Inhibited	http://www.genome.jp/dbget-bin/show_pathway?hsa03018+2026+7832
Fanconi anemia pathway	3460	47	1	0.957767	0	1	0.999095	1	1	Inhibited	http://www.genome.jp/dbget-bin/show_pathway?hsa03460+2187
NOD-like receptor signaling pathway	4621	56	1	0.976979	0	1	0.999733	1	1	Inhibited	http://www.genome.jp/dbget-bin/show_pathway?hsa04621+6347
Epstein-Barr virus infection	5169	191	3	0.999742	0	1	1	1	1	Inhibited	http://www.genome.jp/dbget-bin/show_pathway?hsa05169+3725+7431+5567
RNA transport	3013	142	1	0.999931	0	1	1	1	1	Inhibited	http://www.genome.jp/dbget-bin/show_pathway?hsa03013+10209

## Sheet: CRC - GSEA
NAME	GS<br> follow link to MSigDB	GS DETAILS	SIZE	ES	NES	NOM p-val	FDR q-val	FWER p-val	RANK AT MAX	LEADING EDGE
KEGG_RENAL_CELL_CARCINOMA	KEGG_RENAL_CELL_CARCINOMA	Details ...	68	0.343554	1.74423	0.00738007	0.597245	0.318	2093	tags=15%, list=9%, signal=16%
KEGG_COLORECTAL_CANCER	KEGG_COLORECTAL_CANCER	Details ...	62	0.445407	1.6855	0.00373134	0.527296	0.464	5340	tags=32%, list=24%, signal=42%
KEGG_ADHERENS_JUNCTION	KEGG_ADHERENS_JUNCTION	Details ...	66	0.439124	1.67127	0.00952381	0.393346	0.503	4634	tags=33%, list=21%, signal=42%
KEGG_AXON_GUIDANCE	KEGG_AXON_GUIDANCE	Details ...	127	0.424599	1.66138	0.00183486	0.316954	0.528	2805	tags=24%, list=13%, signal=28%
KEGG_PRION_DISEASES	KEGG_PRION_DISEASES	Details ...	34	0.557716	1.61864	0.00735294	0.361709	0.64	3847	tags=41%, list=17%, signal=50%
KEGG_ECM_RECEPTOR_INTERACTION	KEGG_ECM_RECEPTOR_INTERACTION	Details ...	81	0.531854	1.60988	0.00924214	0.323283	0.66	3553	tags=46%, list=16%, signal=54%
KEGG_MAPK_SIGNALING_PATHWAY	KEGG_MAPK_SIGNALING_PATHWAY	Details ...	254	0.385522	1.60521	0.00183486	0.287606	0.668	3847	tags=26%, list=17%, signal=32%
KEGG_CELL_ADHESION_MOLECULES_CAMS	KEGG_CELL_ADHESION_MOLECULES_CAMS	Details ...	126	0.559474	1.60448	0.0207939	0.252631	0.669	4584	tags=54%, list=21%, signal=68%
KEGG_FOCAL_ADHESION	KEGG_FOCAL_ADHESION	Details ...	194	0.44927	1.59897	0.0305927	0.23483	0.684	4699	tags=37%, list=21%, signal=47%
KEGG_VASCULAR_SMOOTH_MUSCLE_CONTRACTION	KEGG_VASCULAR_SMOOTH_MUSCLE_CONTRACTION	Details ...	106	0.502596	1.54685	0.00957854	0.31158	0.799	2121	tags=28%, list=10%, signal=31%
KEGG_WNT_SIGNALING_PATHWAY	KEGG_WNT_SIGNALING_PATHWAY	Details ...	145	0.375045	1.53694	0.0113422	0.305623	0.815	4487	tags=26%, list=20%, signal=32%
KEGG_COMPLEMENT_AND_COAGULATION_CASCADES	KEGG_COMPLEMENT_AND_COAGULATION_CASCADES	Details ...	67	0.495571	1.51294	0.00189753	0.334205	0.856	4746	tags=51%, list=21%, signal=64%
KEGG_REGULATION_OF_ACTIN_CYTOSKELETON	KEGG_REGULATION_OF_ACTIN_CYTOSKELETON	Details ...	208	0.365326	1.51166	0.00377358	0.311241	0.858	4584	tags=27%, list=21%, signal=34%
KEGG_DILATED_CARDIOMYOPATHY	KEGG_DILATED_CARDIOMYOPATHY	Details ...	88	0.497628	1.51092	0.0235081	0.290306	0.859	4999	tags=44%, list=23%, signal=57%
KEGG_VIRAL_MYOCARDITIS	KEGG_VIRAL_MYOCARDITIS	Details ...	66	0.518736	1.51048	0.0368324	0.271752	0.86	3853	tags=41%, list=17%, signal=49%
KEGG_ARRHYTHMOGENIC_RIGHT_VENTRICULAR_CARDIOMYOPATHY_ARVC	KEGG_ARRHYTHMOGENIC_RIGHT_VENTRICULAR_CARDIOMYOPATHY_ARVC	Details ...	72	0.458582	1.50863	0.0131827	0.258939	0.864	4584	tags=40%, list=21%, signal=51%
KEGG_CHRONIC_MYELOID_LEUKEMIA	KEGG_CHRONIC_MYELOID_LEUKEMIA	Details ...	72	0.284722	1.50001	0.0471869	0.25835	0.875	6961	tags=38%, list=31%, signal=55%
KEGG_INTESTINAL_IMMUNE_NETWORK_FOR_IGA_PRODUCTION	KEGG_INTESTINAL_IMMUNE_NETWORK_FOR_IGA_PRODUCTION	Details ...	45	0.64136	1.49955	0.056391	0.244906	0.876	4584	tags=67%, list=21%, signal=84%
KEGG_PATHWAYS_IN_CANCER	KEGG_PATHWAYS_IN_CANCER	Details ...	319	0.319771	1.49954	0.00735294	0.232071	0.876	4053	tags=23%, list=18%, signal=27%
KEGG_HYPERTROPHIC_CARDIOMYOPATHY_HCM	KEGG_HYPERTROPHIC_CARDIOMYOPATHY_HCM	Details ...	81	0.47661	1.48907	0.0147059	0.237669	0.884	4999	tags=41%, list=23%, signal=52%
KEGG_PATHOGENIC_ESCHERICHIA_COLI_INFECTION	KEGG_PATHOGENIC_ESCHERICHIA_COLI_INFECTION		51	0.380654	1.48619	0.0515098	0.231101	0.886	2954	tags=20%, list=13%, signal=23%
KEGG_NEUROTROPHIN_SIGNALING_PATHWAY	KEGG_NEUROTROPHIN_SIGNALING_PATHWAY		122	0.303213	1.48602	0.0536044	0.220826	0.888	6700	tags=34%, list=30%, signal=48%
KEGG_GAP_JUNCTION	KEGG_GAP_JUNCTION		86	0.418125	1.46527	0.0320755	0.24327	0.918	5136	tags=35%, list=23%, signal=45%
KEGG_LEISHMANIA_INFECTION	KEGG_LEISHMANIA_INFECTION		68	0.53644	1.45659	0.0996169	0.24636	0.926	5341	tags=53%, list=24%, signal=70%
KEGG_CHEMOKINE_SIGNALING_PATHWAY	KEGG_CHEMOKINE_SIGNALING_PATHWAY		178	0.444862	1.43735	0.0691589	0.26831	0.947	5395	tags=41%, list=24%, signal=54%
KEGG_GLYCOSAMINOGLYCAN_BIOSYNTHESIS_CHONDROITIN_SULFATE	KEGG_GLYCOSAMINOGLYCAN_BIOSYNTHESIS_CHONDROITIN_SULFATE		22	0.502159	1.42832	0.0626186	0.273063	0.953	4875	tags=59%, list=22%, signal=76%
KEGG_PANCREATIC_CANCER	KEGG_PANCREATIC_CANCER		69	0.281339	1.42375	0.064695	0.270543	0.955	6961	tags=38%, list=31%, signal=55%
KEGG_MELANOMA	KEGG_MELANOMA		71	0.379517	1.42013	0.0451128	0.266739	0.958	2364	tags=17%, list=11%, signal=19%
KEGG_MELANOGENESIS	KEGG_MELANOGENESIS		96	0.387604	1.40907	0.0297398	0.274602	0.969	4354	tags=30%, list=20%, signal=37%
KEGG_B_CELL_RECEPTOR_SIGNALING_PATHWAY	KEGG_B_CELL_RECEPTOR_SIGNALING_PATHWAY		74	0.505617	1.40594	0.138837	0.270411	0.97	5352	tags=42%, list=24%, signal=55%
KEGG_TYPE_II_DIABETES_MELLITUS	KEGG_TYPE_II_DIABETES_MELLITUS		44	0.406533	1.40554	0.0606061	0.262115	0.971	6604	tags=41%, list=30%, signal=58%
KEGG_AMYOTROPHIC_LATERAL_SCLEROSIS_ALS	KEGG_AMYOTROPHIC_LATERAL_SCLEROSIS_ALS		51	0.387101	1.38876	0.0776515	0.279738	0.979	140	tags=8%, list=1%, signal=8%
KEGG_SPLICEOSOME	KEGG_SPLICEOSOME		113	0.312036	1.38358	0.163968	0.279207	0.982	10110	tags=55%, list=46%, signal=101%
KEGG_LEUKOCYTE_TRANSENDOTHELIAL_MIGRATION	KEGG_LEUKOCYTE_TRANSENDOTHELIAL_MIGRATION		112	0.411224	1.38032	0.102804	0.276314	0.983	4671	tags=37%, list=21%, signal=46%
KEGG_BASAL_CELL_CARCINOMA	KEGG_BASAL_CELL_CARCINOMA		52	0.424408	1.37175	0.0605505	0.281589	0.987	4354	tags=37%, list=20%, signal=45%
KEGG_TIGHT_JUNCTION	KEGG_TIGHT_JUNCTION		127	0.354777	1.37097	0.0748175	0.274593	0.987	2892	tags=20%, list=13%, signal=23%
KEGG_PRIMARY_IMMUNODEFICIENCY	KEGG_PRIMARY_IMMUNODEFICIENCY		35	0.626088	1.35951	0.157996	0.284665	0.989	4383	tags=57%, list=20%, signal=71%
KEGG_ACUTE_MYELOID_LEUKEMIA	KEGG_ACUTE_MYELOID_LEUKEMIA		56	0.362847	1.34957	0.154876	0.291818	0.992	8159	tags=52%, list=37%, signal=82%
KEGG_MTOR_SIGNALING_PATHWAY	KEGG_MTOR_SIGNALING_PATHWAY		50	0.315421	1.33064	0.142315	0.314335	0.995	6604	tags=42%, list=30%, signal=60%
KEGG_ANTIGEN_PROCESSING_AND_PRESENTATION	KEGG_ANTIGEN_PROCESSING_AND_PRESENTATION		74	0.431734	1.32148	0.126233	0.321537	0.995	3853	tags=32%, list=17%, signal=39%
KEGG_GLIOMA	KEGG_GLIOMA		63	0.285097	1.31562	0.123389	0.323144	0.995	7637	tags=41%, list=35%, signal=63%
KEGG_ASTHMA	KEGG_ASTHMA		27	0.561194	1.30564	0.126195	0.331216	0.998	3853	tags=59%, list=17%, signal=72%
KEGG_HEMATOPOIETIC_CELL_LINEAGE	KEGG_HEMATOPOIETIC_CELL_LINEAGE		84	0.488924	1.30395	0.171815	0.326465	0.998	4374	tags=46%, list=20%, signal=58%
KEGG_AUTOIMMUNE_THYROID_DISEASE	KEGG_AUTOIMMUNE_THYROID_DISEASE		47	0.503272	1.29752	0.136719	0.329811	0.998	3853	tags=45%, list=17%, signal=54%
KEGG_EPITHELIAL_CELL_SIGNALING_IN_HELICOBACTER_PYLORI_INFECTION	KEGG_EPITHELIAL_CELL_SIGNALING_IN_HELICOBACTER_PYLORI_INFECTION		66	0.305277	1.29455	0.138318	0.327181	0.998	5701	tags=27%, list=26%, signal=37%
KEGG_PROSTATE_CANCER	KEGG_PROSTATE_CANCER		89	0.245445	1.29385	0.11943	0.321084	0.998	7637	tags=38%, list=35%, signal=58%
KEGG_FC_GAMMA_R_MEDIATED_PHAGOCYTOSIS	KEGG_FC_GAMMA_R_MEDIATED_PHAGOCYTOSIS		90	0.338834	1.28486	0.218391	0.328538	0.998	5341	tags=34%, list=24%, signal=45%
KEGG_ENDOMETRIAL_CANCER	KEGG_ENDOMETRIAL_CANCER		52	0.286418	1.27994	0.171103	0.328749	0.998	5340	tags=25%, list=24%, signal=33%
KEGG_CYTOKINE_CYTOKINE_RECEPTOR_INTERACTION	KEGG_CYTOKINE_CYTOKINE_RECEPTOR_INTERACTION		246	0.411686	1.2712	0.122841	0.337122	0.999	3543	tags=31%, list=16%, signal=37%
KEGG_TGF_BETA_SIGNALING_PATHWAY	KEGG_TGF_BETA_SIGNALING_PATHWAY		82	0.31974	1.26799	0.137546	0.334806	0.999	3728	tags=18%, list=17%, signal=22%
KEGG_GRAFT_VERSUS_HOST_DISEASE	KEGG_GRAFT_VERSUS_HOST_DISEASE		36	0.522992	1.26284	0.214425	0.33565	0.999	3853	tags=47%, list=17%, signal=57%
KEGG_ALLOGRAFT_REJECTION	KEGG_ALLOGRAFT_REJECTION		34	0.541734	1.2569	0.234375	0.337919	1	5194	tags=56%, list=23%, signal=73%
KEGG_CALCIUM_SIGNALING_PATHWAY	KEGG_CALCIUM_SIGNALING_PATHWAY		171	0.350001	1.25379	0.0561798	0.336762	1	4307	tags=30%, list=19%, signal=37%
KEGG_PURINE_METABOLISM	KEGG_PURINE_METABOLISM		147	0.256216	1.24614	0.110251	0.341959	1	4803	tags=22%, list=22%, signal=28%
KEGG_UBIQUITIN_MEDIATED_PROTEOLYSIS	KEGG_UBIQUITIN_MEDIATED_PROTEOLYSIS		129	0.19504	1.23376	0.213178	0.354182	1	6374	tags=18%, list=29%, signal=25%
KEGG_TYPE_I_DIABETES_MELLITUS	KEGG_TYPE_I_DIABETES_MELLITUS		40	0.478494	1.21631	0.245059	0.374629	1	5313	tags=50%, list=24%, signal=66%
KEGG_ADIPOCYTOKINE_SIGNALING_PATHWAY	KEGG_ADIPOCYTOKINE_SIGNALING_PATHWAY		66	0.29148	1.2068	0.206107	0.383882	1	5904	tags=29%, list=27%, signal=39%
KEGG_LONG_TERM_DEPRESSION	KEGG_LONG_TERM_DEPRESSION		64	0.331341	1.19618	0.198842	0.394625	1	5136	tags=34%, list=23%, signal=45%
KEGG_VASOPRESSIN_REGULATED_WATER_REABSORPTION	KEGG_VASOPRESSIN_REGULATED_WATER_REABSORPTION		44	0.310967	1.18818	0.25777	0.400368	1	7638	tags=45%, list=35%, signal=69%
KEGG_JAK_STAT_SIGNALING_PATHWAY	KEGG_JAK_STAT_SIGNALING_PATHWAY		149	0.343102	1.18185	0.197697	0.40344	1	5427	tags=35%, list=25%, signal=46%
KEGG_SYSTEMIC_LUPUS_ERYTHEMATOSUS	KEGG_SYSTEMIC_LUPUS_ERYTHEMATOSUS		97	0.378277	1.16309	0.215726	0.428002	1	3853	tags=36%, list=17%, signal=43%
KEGG_ERBB_SIGNALING_PATHWAY	KEGG_ERBB_SIGNALING_PATHWAY		86	0.221903	1.14939	0.256684	0.444646	1	5441	tags=26%, list=25%, signal=34%
KEGG_PANTOTHENATE_AND_COA_BIOSYNTHESIS	KEGG_PANTOTHENATE_AND_COA_BIOSYNTHESIS		16	0.446993	1.14499	0.339114	0.44472	1	584	tags=19%, list=3%, signal=19%
KEGG_SMALL_CELL_LUNG_CANCER	KEGG_SMALL_CELL_LUNG_CANCER		84	0.24756	1.13692	0.266544	0.451561	1	3811	tags=19%, list=17%, signal=23%
KEGG_T_CELL_RECEPTOR_SIGNALING_PATHWAY	KEGG_T_CELL_RECEPTOR_SIGNALING_PATHWAY		106	0.342566	1.13564	0.339731	0.446435	1	6865	tags=47%, list=31%, signal=68%
KEGG_TOLL_LIKE_RECEPTOR_SIGNALING_PATHWAY	KEGG_TOLL_LIKE_RECEPTOR_SIGNALING_PATHWAY		96	0.332874	1.1314	0.310212	0.446912	1	6865	tags=42%, list=31%, signal=60%
KEGG_DORSO_VENTRAL_AXIS_FORMATION	KEGG_DORSO_VENTRAL_AXIS_FORMATION		23	0.31252	1.10734	0.319109	0.481214	1	6718	tags=39%, list=30%, signal=56%
KEGG_PHOSPHATIDYLINOSITOL_SIGNALING_SYSTEM	KEGG_PHOSPHATIDYLINOSITOL_SIGNALING_SYSTEM		74	0.235341	1.08656	0.320298	0.509644	1	5355	tags=26%, list=24%, signal=34%
KEGG_NATURAL_KILLER_CELL_MEDIATED_CYTOTOXICITY	KEGG_NATURAL_KILLER_CELL_MEDIATED_CYTOTOXICITY		127	0.329115	1.07946	0.359023	0.514685	1	5123	tags=31%, list=23%, signal=41%
KEGG_PPAR_SIGNALING_PATHWAY	KEGG_PPAR_SIGNALING_PATHWAY		66	0.341803	1.07717	0.325714	0.511819	1	1298	tags=18%, list=6%, signal=19%
KEGG_CYTOSOLIC_DNA_SENSING_PATHWAY	KEGG_CYTOSOLIC_DNA_SENSING_PATHWAY		51	0.327284	1.07421	0.357278	0.509863	1	3684	tags=22%, list=17%, signal=26%
KEGG_CARDIAC_MUSCLE_CONTRACTION	KEGG_CARDIAC_MUSCLE_CONTRACTION		72	0.307641	1.06059	0.359066	0.525734	1	2586	tags=14%, list=12%, signal=16%
KEGG_RNA_POLYMERASE	KEGG_RNA_POLYMERASE		28	0.292054	1.05939	0.407025	0.520822	1	9788	tags=54%, list=44%, signal=96%
KEGG_NOD_LIKE_RECEPTOR_SIGNALING_PATHWAY	KEGG_NOD_LIKE_RECEPTOR_SIGNALING_PATHWAY		59	0.314247	1.05887	0.379845	0.514819	1	7030	tags=42%, list=32%, signal=62%
KEGG_NOTCH_SIGNALING_PATHWAY	KEGG_NOTCH_SIGNALING_PATHWAY		46	0.267201	1.0501	0.394786	0.522587	1	4354	tags=22%, list=20%, signal=27%
KEGG_VEGF_SIGNALING_PATHWAY	KEGG_VEGF_SIGNALING_PATHWAY		70	0.276894	1.03686	0.391304	0.537528	1	5701	tags=31%, list=26%, signal=42%
KEGG_NEUROACTIVE_LIGAND_RECEPTOR_INTERACTION	KEGG_NEUROACTIVE_LIGAND_RECEPTOR_INTERACTION		262	0.308743	1.03301	0.352941	0.536451	1	4722	tags=32%, list=21%, signal=41%
KEGG_RNA_DEGRADATION	KEGG_RNA_DEGRADATION		56	0.219448	0.993773	0.438134	0.595883	1	17281	tags=100%, list=78%, signal=456%
KEGG_RIBOSOME	KEGG_RIBOSOME		69	0.289973	0.989574	0.463265	0.596258	1	10716	tags=84%, list=48%, signal=163%
KEGG_PROGESTERONE_MEDIATED_OOCYTE_MATURATION	KEGG_PROGESTERONE_MEDIATED_OOCYTE_MATURATION		83	0.228015	0.986036	0.484849	0.595014	1	6703	tags=34%, list=30%, signal=48%
KEGG_GLYCOSAMINOGLYCAN_BIOSYNTHESIS_HEPARAN_SULFATE	KEGG_GLYCOSAMINOGLYCAN_BIOSYNTHESIS_HEPARAN_SULFATE		26	0.322113	0.980007	0.47093	0.597706	1	4145	tags=27%, list=19%, signal=33%
KEGG_SNARE_INTERACTIONS_IN_VESICULAR_TRANSPORT	KEGG_SNARE_INTERACTIONS_IN_VESICULAR_TRANSPORT		38	0.218096	0.979553	0.440162	0.591125	1	3106	tags=13%, list=14%, signal=15%
KEGG_GLYCOSAMINOGLYCAN_DEGRADATION	KEGG_GLYCOSAMINOGLYCAN_DEGRADATION		20	0.350432	0.928894	0.539623	0.672149	1	3987	tags=25%, list=18%, signal=30%
KEGG_LYSOSOME	KEGG_LYSOSOME		114	0.210316	0.924525	0.510397	0.671741	1	3637	tags=13%, list=16%, signal=16%
KEGG_INSULIN_SIGNALING_PATHWAY	KEGG_INSULIN_SIGNALING_PATHWAY		134	0.185173	0.912832	0.584087	0.684028	1	6604	tags=30%, list=30%, signal=42%
KEGG_GNRH_SIGNALING_PATHWAY	KEGG_GNRH_SIGNALING_PATHWAY		92	0.218598	0.91109	0.637168	0.679139	1	5299	tags=25%, list=24%, signal=33%
KEGG_REGULATION_OF_AUTOPHAGY	KEGG_REGULATION_OF_AUTOPHAGY		32	0.311707	0.892551	0.611219	0.704329	1	5041	tags=28%, list=23%, signal=36%
KEGG_HEDGEHOG_SIGNALING_PATHWAY	KEGG_HEDGEHOG_SIGNALING_PATHWAY		53	0.281707	0.871422	0.657197	0.733957	1	3998	tags=23%, list=18%, signal=28%
KEGG_OOCYTE_MEIOSIS	KEGG_OOCYTE_MEIOSIS		106	0.176806	0.869519	0.708885	0.728847	1	4849	tags=17%, list=22%, signal=22%
KEGG_TASTE_TRANSDUCTION	KEGG_TASTE_TRANSDUCTION		43	0.329448	0.848973	0.747012	0.754632	1	4229	tags=30%, list=19%, signal=37%
KEGG_ENDOCYTOSIS	KEGG_ENDOCYTOSIS		169	0.160542	0.847921	0.706204	0.748096	1	6371	tags=26%, list=29%, signal=36%
KEGG_PHENYLALANINE_METABOLISM	KEGG_PHENYLALANINE_METABOLISM		17	0.313204	0.840017	0.703985	0.752703	1	605	tags=12%, list=3%, signal=12%
KEGG_GLYCINE_SERINE_AND_THREONINE_METABOLISM	KEGG_GLYCINE_SERINE_AND_THREONINE_METABOLISM		31	0.284658	0.838999	0.779762	0.746389	1	3321	tags=26%, list=15%, signal=30%
KEGG_PRIMARY_BILE_ACID_BIOSYNTHESIS	KEGG_PRIMARY_BILE_ACID_BIOSYNTHESIS		16	0.355984	0.830491	0.685598	0.752032	1	2259	tags=25%, list=10%, signal=28%
KEGG_PROTEASOME	KEGG_PROTEASOME		41	0.24194	0.828379	0.657841	0.747472	1	16781	tags=100%, list=76%, signal=413%
KEGG_FC_EPSILON_RI_SIGNALING_PATHWAY	KEGG_FC_EPSILON_RI_SIGNALING_PATHWAY		73	0.227066	0.817414	0.685658	0.756852	1	5701	tags=32%, list=26%, signal=42%
KEGG_LONG_TERM_POTENTIATION	KEGG_LONG_TERM_POTENTIATION		67	0.190466	0.80802	0.837338	0.763475	1	5136	tags=21%, list=23%, signal=27%
KEGG_ALDOSTERONE_REGULATED_SODIUM_REABSORPTION	KEGG_ALDOSTERONE_REGULATED_SODIUM_REABSORPTION		41	0.239159	0.779259	0.801158	0.797978	1	5340	tags=29%, list=24%, signal=39%
KEGG_THYROID_CANCER	KEGG_THYROID_CANCER		29	0.188096	0.762065	0.773897	0.814737	1	7611	tags=38%, list=34%, signal=58%
KEGG_BASAL_TRANSCRIPTION_FACTORS	KEGG_BASAL_TRANSCRIPTION_FACTORS		32	0.215427	0.750141	0.738854	0.822759	1	255	tags=3%, list=1%, signal=3%
KEGG_NON_SMALL_CELL_LUNG_CANCER	KEGG_NON_SMALL_CELL_LUNG_CANCER		54	0.170162	0.74869	0.756863	0.816662	1	7042	tags=35%, list=32%, signal=51%
KEGG_RIG_I_LIKE_RECEPTOR_SIGNALING_PATHWAY	KEGG_RIG_I_LIKE_RECEPTOR_SIGNALING_PATHWAY		67	0.174638	0.587175	0.984615	0.957929	1	5774	tags=24%, list=26%, signal=32%

[truncated: 6 more sheets: CRC - GSEAPreranked, PCa - pathfindR, PCa - DAVID, PCa - SPIA, PCa - GSEA, PCa - GSEAPreranked]
