# Supplementary material for: pathfindR: An R Package for Comprehensive Identification of Enriched Pathways in Omics Data Through Active Subnetworks
Source: Front Genet. 2019 Sep 25;10:858. doi: 10.3389/fgene.2019.00858 (PMC6773876; doi:10.3389/fgene.2019.00858)
Supplement: Supplementary Datasheet 3 — ORA results using all DEGs and using only DEGs found in the BioGRID PIN for each dataset. [file DataSheet_3.xlsx]

## Sheet: legend
Descriptions of Sheets				Header Descriptions
#	Tab Name	Description		Header	Description
1	All DEGs - RA	Rheumatoid Arthritis dataset - ORA results using all DEGs		ID	KEGG pathway ID
2	All DEGs - CRC	Colorectal Cancer dataset - ORA results using all DEGs		Pathway	KEGG pathway description
3	All DEGs - PCa	Prostate Canncer dataset - ORA results using all DEGs		Fold_Enrichment	Fold enrichment value
4	PIN DEGs - RA	Rheumatoid Arthritis dataset - ORA results using only DEGs found in the BioGRID PIN		p_value	p value from the ORA test
5	PIN DEGs - CRC	Colorectal Cancer dataset - ORA results using only DEGs found in the BioGRID PIN		adj_p	BH-FDR adjusted p value
6	PIN DEGs - PCa	Prostate Canncer dataset - ORA results using only DEGs found in the BioGRID PIN

## Sheet: All DEGs - RA
ID	Pathway	Fold_Enrichment	p_value	adj_p
hsa03040	Spliceosome	2.82066	0.000758008	0.24332
hsa05110	Vibrio cholerae infection	4.26457	0.00311464	0.499899
hsa05130	Pathogenic Escherichia coli infection	3.31689	0.00535275	0.521835
hsa03410	Base excision repair	3.87688	0.00858923	0.521835
hsa00270	Cysteine and methionine metabolism	3.83811	0.00955182	0.521835
hsa04130	SNARE interactions in vesicular transport	3.99803	0.00975392	0.521835
hsa00330	Arginine and proline metabolism	3.48919	0.0116534	0.528224
hsa05131	Shigellosis	2.93626	0.0131645	0.528224
hsa04659	Th17 cell differentiation	2.30287	0.0241703	0.684237
hsa04658	Th1 and Th2 cell differentiation	2.40823	0.0273449	0.684237
hsa05133	Pertussis	2.59582	0.0287496	0.684237
hsa03022	Basal transcription factors	2.84305	0.0302257	0.684237
hsa00561	Glycerolipid metabolism	3.65534	0.0313559	0.684237
hsa04064	NF-kappa B signaling pathway	2.27444	0.0323117	0.684237
hsa03420	Nucleotide excision repair	2.78124	0.0356369	0.684237
hsa03013	RNA transport	2.10308	0.0362349	0.684237
hsa04145	Phagosome	2.06957	0.0362368	0.684237
hsa05016	Huntington disease	2.20289	0.039894	0.698781
hsa05166	Human T-cell leukemia virus 1 infection	1.74212	0.0427318	0.698781
hsa04722	Neurotrophin signaling pathway	2.02006	0.0435378	0.698781
hsa05418	Fluid shear stress and atherosclerosis	1.95324	0.0460264	0.703547
hsa00514	Other types of O-glycan biosynthesis	5.48302	0.0526676	0.768468
hsa00340	Histidine metabolism	4.26457	0.0588709	0.787398
hsa03430	Mismatch repair	3.33749	0.0588709	0.787398
hsa00620	Pyruvate metabolism	3.01028	0.0646529	0.812943
hsa04714	Thermogenesis	2.0827	0.0658458	0.812943
hsa05010	Alzheimer disease	2.10046	0.0723251	0.849784
hsa04921	Oxytocin signaling pathway	2.11466	0.0747596	0.849784
hsa00190	Oxidative phosphorylation	2.44986	0.0767717	0.849784
hsa04966	Collecting duct acid secretion	3.33749	0.0868429	0.929219
hsa00650	Butanoate metabolism	3.48919	0.0945708	0.946671
hsa04744	Phototransduction	5.11748	0.0945708	0.946671
hsa04721	Synaptic vesicle cycle	2.32613	0.0993449	0.946671
hsa05012	Parkinson disease	2.17252	0.104601	0.946671
hsa05168	Herpes simplex infection	1.62695	0.109958	0.946671
hsa00020	Citrate cycle (TCA cycle)	2.74151	0.110825	0.946671
hsa00280	Valine, leucine and isoleucine degradation	2.4369	0.117057	0.946671
hsa00410	beta-Alanine metabolism	2.84305	0.119326	0.946671
hsa04710	Circadian rhythm	2.55874	0.119326	0.946671
hsa00510	N-Glycan biosynthesis	3.65534	0.123764	0.946671
hsa00010	Glycolysis / Gluconeogenesis	2.13228	0.126426	0.946671
hsa04136	Autophagy - other	2.64697	0.12806	0.946671
hsa04932	Non-alcoholic fatty liver disease (NAFLD)	1.73148	0.129716	0.946671
hsa04530	Tight junction	1.72888	0.129762	0.946671
hsa03015	mRNA surveillance pathway	1.87225	0.145368	1
hsa05100	Bacterial invasion of epithelial cells	1.72888	0.162838	1
hsa05140	Leishmaniasis	1.85416	0.162838	1
hsa05152	Tuberculosis	1.59921	0.163697	1
hsa03030	DNA replication	2.19321	0.165056	1
hsa04919	Thyroid hormone signaling pathway	1.64323	0.168649	1
hsa05163	Human cytomegalovirus infection	1.49053	0.1717	1
hsa05165	Human papillomavirus infection	1.44995	0.176192	1
hsa00400	Phenylalanine, tyrosine and tryptophan biosynthesis	6.39685	0.180743	1
hsa00524	Neomycin, kanamycin and gentamicin biosynthesis	6.39685	0.180743	1
hsa00670	One carbon pool by folate	3.19843	0.182924	1
hsa04022	cGMP-PKG signaling pathway	1.73148	0.188386	1
hsa04260	Cardiac muscle contraction	2.16842	0.18918	1
hsa05167	Kaposi sarcoma-associated herpesvirus infection	1.47904	0.192776	1
hsa05202	Transcriptional misregulation in cancer	1.55075	0.192776	1
hsa04270	Vascular smooth muscle contraction	2.01249	0.195064	1
hsa00220	Arginine biosynthesis	2.84305	0.197253	1
hsa05416	Viral myocarditis	1.93113	0.198654	1
hsa00380	Tryptophan metabolism	2.32613	0.204732	1
hsa00750	Vitamin B6 metabolism	4.26457	0.212772	1
hsa04975	Fat digestion and absorption	2.84305	0.214976	1
hsa04625	C-type lectin receptor signaling pathway	1.6508	0.221459	1
hsa05132	Salmonella infection	1.61946	0.245826	1
hsa00071	Fatty acid degradation	1.91906	0.246292	1
hsa05230	Central carbon metabolism in cancer	1.70583	0.248805	1
hsa04930	Type II diabetes mellitus	1.7446	0.267545	1
hsa04670	Leukocyte transendothelial migration	1.56658	0.27367	1
hsa05031	Amphetamine addiction	1.67786	0.27483	1
hsa05120	Epithelial cell signaling in Helicobacter pylori infection	1.57461	0.27483	1
hsa05414	Dilated cardiomyopathy (DCM)	1.7769	0.275658	1
hsa05145	Toxoplasmosis	1.44834	0.280402	1
hsa04210	Apoptosis	1.39931	0.282515	1
hsa04015	Rap1 signaling pathway	1.42152	0.286407	1
hsa04371	Apelin signaling pathway	1.4926	0.28868	1
hsa04218	Cellular senescence	1.34671	0.288739	1
hsa00520	Amino sugar and nucleotide sugar metabolism	1.78517	0.288998	1
hsa04662	B cell receptor signaling pathway	1.48333	0.301277	1
hsa05412	Arrhythmogenic right ventricular cardiomyopathy (ARVC)	1.76465	0.31016	1
hsa04713	Circadian entrainment	1.59921	0.321627	1
hsa04925	Aldosterone synthesis and secretion	1.68338	0.321627	1
hsa04918	Thyroid hormone synthesis	1.73474	0.327996	1
hsa00062	Fatty acid elongation	2.69341	0.328663	1
hsa00630	Glyoxylate and dicarboxylate metabolism	2.04699	0.328663	1
hsa00072	Synthesis and degradation of ketone bodies	2.84305	0.328864	1
hsa05161	Hepatitis B	1.29791	0.332602	1
hsa04971	Gastric acid secretion	1.89536	0.336938	1
hsa05212	Pancreatic cancer	1.36466	0.336938	1
hsa05310	Asthma	2.22499	0.3431	1
hsa04750	Inflammatory mediator regulation of TRP channels	1.59921	0.34495	1
hsa05220	Chronic myeloid leukemia	1.34671	0.345889	1
hsa04611	Platelet activation	1.43481	0.349347	1
hsa04066	HIF-1 signaling pathway	1.39062	0.352752	1
hsa05164	Influenza A	1.30382	0.352881	1
hsa03460	Fanconi anemia pathway	1.56658	0.353782	1
hsa04660	T cell receptor signaling pathway	1.34671	0.360562	1
hsa04150	mTOR signaling pathway	1.32675	0.370967	1
hsa00051	Fructose and mannose metabolism	1.89536	0.371657	1
hsa04922	Glucagon signaling pathway	1.45383	0.376192	1
hsa04620	Toll-like receptor signaling pathway	1.39062	0.384007	1
hsa04140	Autophagy - animal	1.24817	0.384426	1
hsa03010	Ribosome	1.4329	0.390264	1
hsa04728	Dopaminergic synapse	1.2688	0.405497	1
hsa05160	Hepatitis C	1.30105	0.405497	1
hsa00310	Lysine degradation	1.59921	0.40725	1
hsa05410	Hypertrophic cardiomyopathy (HCM)	1.46214	0.408406	1
hsa05162	Measles	1.2381	0.412511	1
hsa00350	Tyrosine metabolism	1.70583	0.413506	1
hsa04014	Ras signaling pathway	1.29229	0.421601	1
hsa04668	TNF signaling pathway	1.20695	0.430699	1
hsa04213	Longevity regulating pathway - multiple species	1.34671	0.438708	1
hsa05330	Allograft rejection	1.59921	0.440623	1
hsa04120	Ubiquitin mediated proteolysis	1.15432	0.447415	1
hsa04910	Insulin signaling pathway	1.2282	0.447415	1
hsa04217	Necroptosis	1.28857	0.448049	1
hsa05170	Human immunodeficiency virus 1 infection	1.19941	0.448247	1
hsa04924	Renin secretion	1.50514	0.469511	1
hsa05321	Inflammatory bowel disease (IBD)	1.34671	0.469511	1
hsa04970	Salivary secretion	1.67786	0.469647	1
hsa05323	Rheumatoid arthritis	1.24817	0.469647	1
hsa04666	Fc gamma R-mediated phagocytosis	1.21845	0.478217	1
hsa00970	Aminoacyl-tRNA biosynthesis	2.07466	0.47961	1
hsa03440	Homologous recombination	1.3831	0.479963	1
hsa05332	Graft-versus-host disease	1.46214	0.479963	1
hsa04621	NOD-like receptor signaling pathway	1.21022	0.48605	1
hsa05225	Hepatocellular carcinoma	1.17837	0.48605	1
hsa00360	Phenylalanine metabolism	1.70583	0.492419	1
hsa00910	Nitrogen metabolism	1.96826	0.492419	1
hsa04657	IL-17 signaling pathway	1.29557	0.495194	1
hsa04261	Adrenergic signaling in cardiomyocytes	1.27937	0.495463	1
hsa04940	Type I diabetes mellitus	1.34671	0.505228	1
hsa04152	AMPK signaling pathway	1.15259	0.506559	1
hsa04920	Adipocytokine signaling pathway	1.2381	0.509346	1
hsa00511	Other glycan degradation	2.13228	0.512279	1
hsa00230	Purine metabolism	1.39931	0.517133	1
hsa04962	Vasopressin-regulated water reabsorption	1.27937	0.517558	1
hsa05215	Prostate cancer	1.1125	0.528415	1
hsa05214	Glioma	1.12886	0.528667	1
hsa03050	Proteasome	1.19011	0.529682	1
hsa05203	Viral carcinogenesis	1.14357	0.529926	1
hsa00770	Pantothenate and CoA biosynthesis	2.32613	0.531363	1
hsa04110	Cell cycle	1.04866	0.53579	1
hsa04114	Oocyte meiosis	1.29229	0.53579	1
hsa04520	Adherens junction	1.16306	0.538168	1
hsa00532	Glycosaminoglycan biosynthesis - chondroitin sulfate / dermatan sulfate	2.13228	0.549702	1
hsa00565	Ether lipid metabolism	1.89536	0.553301	1
hsa04380	Osteoclast differentiation	1.09348	0.557184	1
hsa00240	Pyrimidine metabolism	1.19011	0.560536	1
hsa04916	Melanogenesis	1.26358	0.560536	1
hsa04330	Notch signaling pathway	1.16306	0.564793	1
hsa05142	Chagas disease (American trypanosomiasis)	1.07736	0.568379	1
hsa04020	Calcium signaling pathway	1.23525	0.577069	1
hsa04612	Antigen processing and presentation	1.21845	0.58397	1
hsa00900	Terpenoid backbone biosynthesis	1.27937	0.584259	1
hsa04979	Cholesterol metabolism	1.13722	0.587133	1
hsa04068	FoxO signaling pathway	1.00738	0.591718	1
hsa04928	Parathyroid hormone synthesis, secretion and action	1.13722	0.598956	1
hsa03060	Protein export	1.59921	0.600531	1
hsa04964	Proximal tubule bicarbonate reclamation	1.34671	0.600531	1
hsa04931	Insulin resistance	1.05515	0.606395	1
hsa04630	JAK-STAT signaling pathway	1.08883	0.611077	1
hsa00534	Glycosaminoglycan biosynthesis - heparan sulfate / heparin	2.55874	0.616168	1
hsa04915	Estrogen signaling pathway	1.16306	0.618245	1
hsa05320	Autoimmune thyroid disease	1.24817	0.619028	1
hsa04141	Protein processing in endoplasmic reticulum	1.06614	0.62888	1
hsa00563	Glycosylphosphatidylinositol (GPI)-anchor biosynthesis	1.70583	0.631193	1
hsa05134	Legionellosis	0.947682	0.639218	1
hsa00790	Folate biosynthesis	1.16306	0.645631	1
hsa04012	ErbB signaling pathway	0.947682	0.650967	1
hsa05210	Colorectal cancer	0.903085	0.658777	1
hsa00053	Ascorbate and aldarate metabolism	1.96826	0.659505	1
hsa04514	Cell adhesion molecules (CAMs)	1.09348	0.66213	1
hsa05200	Pathways in cancer	1.03219	0.671979	1
hsa05169	Epstein-Barr virus infection	0.937759	0.674954	1
hsa04072	Phospholipase D signaling pathway	1.05733	0.679906	1
hsa04211	Longevity regulating pathway	0.936125	0.681447	1
hsa04723	Retrograde endocannabinoid signaling	1.10291	0.691403	1
hsa00052	Galactose metabolism	1.06614	0.709786	1
hsa00512	Mucin type O-glycan biosynthesis	1.42152	0.709786	1
hsa04912	GnRH signaling pathway	1.01003	0.709905	1
hsa05034	Alcoholism	1.12886	0.710419	1
hsa04142	Lysosome	0.947682	0.71343	1
hsa04927	Cortisol synthesis and secretion	1.08883	0.71974	1
hsa00640	Propanoate metabolism	0.947682	0.721152	1
hsa05221	Acute myeloid leukemia	0.799607	0.735436	1
hsa00564	Glycerophospholipid metabolism	1.2584	0.73637	1
hsa04720	Long-term potentiation	0.852914	0.742999	1
hsa04914	Progesterone-mediated oocyte maturation	0.984131	0.748869	1
hsa00250	Alanine, aspartate and glutamate metabolism	0.8254	0.752653	1
hsa05143	African trypanosomiasis	0.775376	0.752653	1
hsa04926	Relaxin signaling pathway	0.882325	0.752984	1
hsa04062	Chemokine signaling pathway	0.977863	0.753055	1
hsa05211	Renal cell carcinoma	0.787305	0.757572	1
hsa03008	Ribosome biogenesis in eukaryotes	1.12886	0.76089	1
hsa00500	Starch and sucrose metabolism	1.0235	0.762343	1
hsa05216	Thyroid cancer	0.710761	0.771654	1
hsa05340	Primary immunodeficiency	0.752571	0.771654	1
hsa00980	Metabolism of xenobiotics by cytochrome P450	0.984131	0.797072	1
hsa00260	Glycine, serine and threonine metabolism	0.799607	0.797458	1
hsa04216	Ferroptosis	0.775376	0.797458	1
hsa05205	Proteoglycans in cancer	0.829862	0.802532	1
hsa05219	Bladder cancer	0.624083	0.805395	1
hsa04725	Cholinergic synapse	0.799607	0.818877	1
hsa04360	Axon guidance	0.894665	0.818986	1
hsa04151	PI3K-Akt signaling pathway	0.893529	0.821644	1
hsa02010	ABC transporters	0.852914	0.827392	1
hsa04973	Carbohydrate digestion and absorption	0.882325	0.827392	1
hsa05206	MicroRNAs in cancer	1.6104	0.831304	1
hsa04146	Peroxisome	0.775376	0.84083	1
hsa04810	Regulation of actin cytoskeleton	0.808024	0.843973	1
hsa04144	Endocytosis	0.810461	0.845278	1
hsa04350	TGF-beta signaling pathway	0.701025	0.845654	1
hsa04961	Endocrine and other factor-regulated calcium reabsorption	0.595056	0.846907	1
hsa04911	Insulin secretion	0.763803	0.850345	1
hsa04672	Intestinal immune network for IgA production	0.639685	0.852909	1
hsa04390	Hippo signaling pathway	0.758146	0.857113	1
hsa04913	Ovarian steroidogenesis	0.752571	0.858677	1
hsa05030	Cocaine addiction	0.556248	0.858677	1
hsa05144	Malaria	0.609224	0.858677	1
hsa04540	Gap junction	0.664608	0.86365	1
hsa04727	GABAergic synapse	0.775376	0.86365	1
hsa05032	Morphine addiction	0.763803	0.875864	1
hsa05222	Small cell lung cancer	0.581532	0.883437	1
hsa04923	Regulation of lipolysis in adipocytes	0.556248	0.884299	1
hsa00480	Glutathione metabolism	0.544413	0.893198	1
hsa05150	Staphylococcus aureus infection	0.533071	0.893198	1
hsa04024	cAMP signaling pathway	0.799607	0.89326	1
hsa04972	Pancreatic secretion	0.701025	0.894	1
hsa04010	MAPK signaling pathway	0.775376	0.894921	1
hsa05322	Systemic lupus erythematosus	0.872298	0.896821	1
hsa04640	Hematopoietic cell lineage	0.595056	0.897318	1
hsa05213	Endometrial cancer	0.448902	0.901414	1
hsa04070	Phosphatidylinositol signaling system	0.624083	0.903667	1
hsa05231	Choline metabolism in cancer	0.647783	0.903667	1
hsa04370	VEGF signaling pathway	0.465226	0.905282	1
hsa00140	Steroid hormone biosynthesis	0.710761	0.908999	1
hsa04623	Cytosolic DNA-sensing pathway	0.473841	0.919298	1
hsa04137	Mitophagy - animal	0.419466	0.925509	1
hsa00830	Retinol metabolism	0.639685	0.931243	1
hsa04664	Fc epsilon RI signaling pathway	0.406149	0.933943	1
hsa04622	RIG-I-like receptor signaling pathway	0.406149	0.939028	1
hsa04917	Prolactin signaling pathway	0.370832	0.939028	1
hsa04724	Glutamatergic synapse	0.574998	0.940798	1
hsa00982	Drug metabolism - cytochrome P450	0.544413	0.941423	1
hsa04976	Bile secretion	0.522192	0.941423	1
hsa03320	PPAR signaling pathway	0.406149	0.948057	1
hsa04071	Sphingolipid signaling pathway	0.511748	0.94812	1
hsa04510	Focal adhesion	0.574998	0.954872	1
hsa00983	Drug metabolism - other enzymes	0.448902	0.957489	1
hsa03018	RNA degradation	0.387688	0.957489	1
hsa04610	Complement and coagulation cascades	0.370832	0.957489	1
hsa04512	ECM-receptor interaction	0.387688	0.962307	1
hsa05204	Chemical carcinogenesis	0.448902	0.962307	1
hsa04650	Natural killer cell mediated cytotoxicity	0.452875	0.966407	1
hsa04060	Cytokine-cytokine receptor interaction	0.682331	0.975305	1
hsa05146	Amoebiasis	0.301028	0.978503	1
hsa04310	Wnt signaling pathway	0.4127	0.979842	1
hsa05226	Gastric cancer	0.396704	0.981818	1
hsa04934	Cushing syndrome	0.4127	0.984702	1
hsa04726	Serotonergic synapse	0.266536	0.989566	1
hsa04550	Signaling pathways regulating pluripotency of stem cells	0.213228	0.996183	1
hsa05224	Breast cancer	0.199902	0.997234	1
hsa04080	Neuroactive ligand-receptor interaction	0.131894	0.999986	1
hsa04740	Olfactory transduction	2.13228	0.999997	1
hsa00030	Pentose phosphate pathway	0	1	1
hsa00040	Pentose and glucuronate interconversions	0	1	1
hsa00061	Fatty acid biosynthesis	0	1	1
hsa00100	Steroid biosynthesis	0	1	1
hsa00120	Primary bile acid biosynthesis	0	1	1
hsa00130	Ubiquinone and other terpenoid-quinone biosynthesis	0	1	1
hsa00232	Caffeine metabolism	0	1	1
hsa00290	Valine, leucine and isoleucine biosynthesis	0	1	1
hsa00430	Taurine and hypotaurine metabolism	0	1	1
hsa00440	Phosphonate and phosphinate metabolism	0	1	1
hsa00450	Selenocompound metabolism	0	1	1
hsa00471	D-Glutamine and D-glutamate metabolism	0	1	1
hsa00472	D-Arginine and D-ornithine metabolism	0	1	1
hsa00515	Mannose type O-glycan biosynthesis	0	1	1
hsa00531	Glycosaminoglycan degradation	0	1	1
hsa00533	Glycosaminoglycan biosynthesis - keratan sulfate	0	1	1
hsa00562	Inositol phosphate metabolism	0	1	1
hsa00590	Arachidonic acid metabolism	0	1	1
hsa00591	Linoleic acid metabolism	0	1	1
hsa00592	alpha-Linolenic acid metabolism	0	1	1
hsa00600	Sphingolipid metabolism	0	1	1
hsa00601	Glycosphingolipid biosynthesis - lacto and neolacto series	0	1	1
hsa00603	Glycosphingolipid biosynthesis - globo and isoglobo series	0	1	1
hsa00604	Glycosphingolipid biosynthesis - ganglio series	0	1	1
hsa00730	Thiamine metabolism	0	1	1
hsa00740	Riboflavin metabolism	0	1	1
hsa00760	Nicotinate and nicotinamide metabolism	0	1	1
hsa00780	Biotin metabolism	0	1	1
hsa00785	Lipoic acid metabolism	0	1	1
hsa00860	Porphyrin and chlorophyll metabolism	0	1	1
hsa00920	Sulfur metabolism	0	1	1
hsa01040	Biosynthesis of unsaturated fatty acids	0	1	1
hsa03020	RNA polymerase	0	1	1
hsa03450	Non-homologous end-joining	0	1	1
hsa04115	p53 signaling pathway	0	1	1
hsa04122	Sulfur relay system	0	1	1
hsa04215	Apoptosis - multiple species	0	1	1
hsa04340	Hedgehog signaling pathway	0	1	1
hsa04392	Hippo signaling pathway - multiple species	0	1	1
hsa04614	Renin-angiotensin system	0	1	1
hsa04730	Long-term depression	0	1	1
hsa04742	Taste transduction	0	1	1
hsa04933	AGE-RAGE signaling pathway in diabetic complications	0	1	1
hsa04950	Maturity onset diabetes of the young	0	1	1
hsa04960	Aldosterone-regulated sodium reabsorption	0	1	1
hsa04974	Protein digestion and absorption	0	1	1
hsa04977	Vitamin digestion and absorption	0	1	1
hsa04978	Mineral absorption	0	1	1
hsa05014	Amyotrophic lateral sclerosis (ALS)	0	1	1
hsa05020	Prion diseases	0	1	1
hsa05033	Nicotine addiction	0	1	1
hsa05217	Basal cell carcinoma	0	1	1
hsa05218	Melanoma	0	1	1
hsa05223	Non-small cell lung cancer	0	1	1

## Sheet: All DEGs - CRC
ID	Pathway	Fold_Enrichment	p_value	adj_p
hsa00280	Valine, leucine and isoleucine degradation	6.42471	4.56218e-14	1.46446e-11
hsa00640	Propanoate metabolism	6.39615	3.87094e-09	6.21286e-07
hsa00071	Fatty acid degradation	4.58724	1.49902e-07	1.60395e-05
hsa04510	Focal adhesion	2.36487	5.13976e-06	0.000412466
hsa04512	ECM-receptor interaction	3.4343	1.2628e-05	0.000810718
hsa00650	Butanoate metabolism	5.39676	2.01498e-05	0.00107801
hsa00410	beta-Alanine metabolism	4.39736	6.12016e-05	0.00280653
hsa00380	Tryptophan metabolism	3.92491	0.000182107	0.00730704
hsa04924	Renin secretion	3.3862	0.00021962	0.00783313
hsa00072	Synthesis and degradation of ketone bodies	5.99639	0.00114726	0.0342773
hsa04810	Regulation of actin cytoskeleton	1.93147	0.00117461	0.0342773
hsa04022	cGMP-PKG signaling pathway	2.19116	0.00209776	0.0561151
hsa04974	Protein digestion and absorption	3.33618	0.00340421	0.0815609
hsa04270	Vascular smooth muscle contraction	2.54678	0.00355717	0.0815609
hsa00770	Pantothenate and CoA biosynthesis	5.88737	0.00589232	0.126096
hsa03320	PPAR signaling pathway	2.39856	0.00737183	0.147897
hsa00620	Pyruvate metabolism	2.85711	0.00806668	0.152318
hsa05205	Proteoglycans in cancer	1.69196	0.0109077	0.19452
hsa04520	Adherens junction	2.12599	0.0141251	0.238639
hsa00350	Tyrosine metabolism	2.87827	0.0153402	0.24621
hsa00310	Lysine degradation	2.47351	0.0183174	0.279995
hsa04933	AGE-RAGE signaling pathway in diabetic complications	1.87713	0.0194122	0.283241
hsa04530	Tight junction	1.7503	0.0244409	0.333545
hsa04923	Regulation of lipolysis in adipocytes	2.34642	0.024938	0.333545
hsa00270	Cysteine and methionine metabolism	2.42854	0.0266542	0.34224
hsa04540	Gap junction	1.96246	0.0311393	0.366681
hsa00740	Riboflavin metabolism	4.62579	0.0311446	0.366681
hsa05412	Arrhythmogenic right ventricular cardiomyopathy (ARVC)	2.23314	0.0319846	0.366681
hsa05414	Dilated cardiomyopathy (DCM)	2.09874	0.0368816	0.408241
hsa05020	Prion diseases	2.36108	0.0387664	0.414801
hsa00920	Sulfur metabolism	4.62579	0.0435594	0.44102
hsa00500	Starch and sucrose metabolism	3.02218	0.044421	0.44102
hsa00290	Valine, leucine and isoleucine biosynthesis	10.7935	0.0453385	0.44102
hsa00900	Terpenoid backbone biosynthesis	2.69838	0.0471063	0.444739
hsa00020	Citrate cycle (TCA cycle)	2.3129	0.0538956	0.480569
hsa00630	Glyoxylate and dicarboxylate metabolism	2.59044	0.0538956	0.480569
hsa00340	Histidine metabolism	2.9982	0.0557692	0.483835
hsa00982	Drug metabolism - cytochrome P450	2.52614	0.0612416	0.490959
hsa00052	Galactose metabolism	2.69838	0.0618102	0.490959
hsa00590	Arachidonic acid metabolism	2.39856	0.0630803	0.490959
hsa05130	Pathogenic Escherichia coli infection	1.79892	0.0644493	0.490959
hsa00360	Phenylalanine metabolism	2.87827	0.0657671	0.490959
hsa00450	Selenocompound metabolism	3.59784	0.0657671	0.490959
hsa04921	Oxytocin signaling pathway	1.78405	0.0689547	0.503056
hsa00260	Glycine, serine and threonine metabolism	2.36108	0.0721532	0.514692
hsa05144	Malaria	2.05591	0.0794371	0.545761
hsa04146	Peroxisome	1.96246	0.0800146	0.545761
hsa04020	Calcium signaling pathway	1.71207	0.0816092	0.545761
hsa05133	Pertussis	1.7207	0.0904926	0.578753
hsa05418	Fluid shear stress and atherosclerosis	1.48308	0.091347	0.578753
hsa04670	Leukocyte transendothelial migration	1.65207	0.0931548	0.578753
hsa00010	Glycolysis / Gluconeogenesis	1.79892	0.0951732	0.578753
hsa05014	Amyotrophic lateral sclerosis (ALS)	1.72696	0.0955574	0.578753
hsa04726	Serotonergic synapse	1.68649	0.104446	0.620871
hsa04010	MAPK signaling pathway	1.39007	0.107675	0.628433
hsa04610	Complement and coagulation cascades	1.7207	0.111514	0.629552
hsa04514	Cell adhesion molecules (CAMs)	1.66054	0.11179	0.629552
hsa05200	Pathways in cancer	1.30622	0.118456	0.655591
hsa04371	Apelin signaling pathway	1.52908	0.13133	0.70505
hsa04360	Axon guidance	1.58506	0.131785	0.70505
hsa00062	Fatty acid elongation	2.8404	0.139462	0.733892
hsa05100	Bacterial invasion of epithelial cells	1.45858	0.14433	0.738
hsa04151	PI3K-Akt signaling pathway	1.33634	0.145385	0.738
hsa04926	Relaxin signaling pathway	1.48876	0.14714	0.738
hsa04728	Dopaminergic synapse	1.42724	0.154082	0.743184
hsa04024	cAMP signaling pathway	1.55157	0.158235	0.743184
hsa01040	Biosynthesis of unsaturated fatty acids	3.08386	0.158634	0.743184
hsa04614	Renin-angiotensin system	2.1587	0.158634	0.743184
hsa04913	Ovarian steroidogenesis	2.22219	0.164247	0.743184
hsa05030	Cocaine addiction	1.64249	0.164247	0.743184
hsa05012	Parkinson disease	1.73103	0.16438	0.743184
hsa05031	Amphetamine addiction	1.59249	0.175171	0.774972
hsa04713	Circadian entrainment	1.61903	0.17624	0.774972
hsa04666	Fc gamma R-mediated phagocytosis	1.41344	0.219915	0.941237
hsa05032	Morphine addiction	1.77207	0.219915	0.941237
hsa05204	Chemical carcinogenesis	1.8936	0.226098	0.954965
hsa05410	Hypertrophic cardiomyopathy (HCM)	1.54193	0.23741	0.989723
hsa05222	Small cell lung cancer	1.34919	0.241228	0.992746
hsa00785	Lipoic acid metabolism	10.7935	0.253005	1
hsa00565	Ether lipid metabolism	2.39856	0.266687	1
hsa04015	Rap1 signaling pathway	1.31921	0.272493	1
hsa05165	Human papillomavirus infection	1.25924	0.273546	1
hsa04925	Aldosterone synthesis and secretion	1.56222	0.274528	1
hsa05146	Amoebiasis	1.39681	0.274528	1
hsa04310	Wnt signaling pathway	1.39271	0.276938	1
hsa00830	Retinol metabolism	2.1587	0.279017	1
hsa04392	Hippo signaling pathway - multiple species	1.79892	0.279278	1
hsa00520	Amino sugar and nucleotide sugar metabolism	1.50607	0.283053	1
hsa04380	Osteoclast differentiation	1.29153	0.287012	1
hsa05120	Epithelial cell signaling in Helicobacter pylori infection	1.32843	0.292863	1
hsa04723	Retrograde endocannabinoid signaling	1.48876	0.295493	1
hsa04727	GABAergic synapse	1.63538	0.296735	1
hsa00330	Arginine and proline metabolism	1.47184	0.29963	1
hsa00760	Nicotinate and nicotinamide metabolism	1.79892	0.300788	1
hsa04932	Non-alcoholic fatty liver disease (NAFLD)	1.29847	0.304911	1
hsa04014	Ras signaling pathway	1.3083	0.315138	1
hsa04970	Salivary secretion	1.76943	0.321491	1
hsa04725	Cholinergic synapse	1.34919	0.342688	1
hsa05218	Melanoma	1.3083	0.349637	1
hsa04912	GnRH signaling pathway	1.4202	0.359363	1
hsa04724	Glutamatergic synapse	1.4553	0.365652	1
hsa04625	C-type lectin receptor signaling pathway	1.27665	0.368879	1
hsa00232	Caffeine metabolism	2.69838	0.385038	1
hsa00040	Pentose and glucuronate interconversions	2.39856	0.387859	1
hsa04911	Insulin secretion	1.44987	0.388952	1
hsa00980	Metabolism of xenobiotics by cytochrome P450	1.66054	0.393073	1
hsa04928	Parathyroid hormone synthesis, secretion and action	1.31921	0.393196	1
hsa05132	Salmonella infection	1.22964	0.402562	1
hsa05210	Colorectal cancer	1.14284	0.402562	1
hsa05170	Human immunodeficiency virus 1 infection	1.18054	0.407128	1
hsa00603	Glycosphingolipid biosynthesis - globo and isoglobo series	1.96246	0.411165	1
hsa00563	Glycosylphosphatidylinositol (GPI)-anchor biosynthesis	2.1587	0.412288	1
hsa00592	alpha-Linolenic acid metabolism	2.1587	0.412288	1
hsa04720	Long-term potentiation	1.25924	0.428552	1
hsa00790	Folate biosynthesis	1.47184	0.437808	1
hsa00750	Vitamin B6 metabolism	1.79892	0.442033	1
hsa04340	Hedgehog signaling pathway	1.34919	0.443409	1
hsa05167	Kaposi sarcoma-associated herpesvirus infection	1.12302	0.459487	1
hsa05202	Transcriptional misregulation in cancer	1.17747	0.459487	1
hsa05211	Renal cell carcinoma	1.16238	0.45962	1
hsa00053	Ascorbate and aldarate metabolism	2.49081	0.462894	1
hsa00601	Glycosphingolipid biosynthesis - lacto and neolacto series	1.61903	0.462894	1
hsa04261	Adrenergic signaling in cardiomyocytes	1.25924	0.466346	1
hsa05416	Viral myocarditis	1.22191	0.469286	1
hsa04611	Platelet activation	1.21049	0.47027	1
hsa00120	Primary bile acid biosynthesis	1.66054	0.476161	1
hsa04114	Oocyte meiosis	1.3083	0.481821	1
hsa04730	Long-term depression	1.22191	0.485934	1
hsa04922	Glucagon signaling pathway	1.22654	0.487351	1
hsa04072	Phospholipase D signaling pathway	1.24884	0.487672	1
hsa04662	B cell receptor signaling pathway	1.09499	0.490304	1
hsa04976	Bile secretion	1.54193	0.490304	1
hsa00561	Glycerolipid metabolism	1.54193	0.502413	1
hsa04213	Longevity regulating pathway - multiple species	1.13616	0.518701	1
hsa05163	Human cytomegalovirus infection	1.10031	0.519757	1
hsa04721	Synaptic vesicle cycle	1.17747	0.534777	1
hsa00030	Pentose phosphate pathway	1.24541	0.534914	1
hsa00564	Glycerophospholipid metabolism	1.59249	0.549401	1
hsa04971	Gastric acid secretion	1.39916	0.549912	1
hsa04145	Phagosome	1.1111	0.550435	1
hsa00860	Porphyrin and chlorophyll metabolism	1.72696	0.553958	1
hsa04668	TNF signaling pathway	1.01826	0.573452	1
hsa05231	Choline metabolism in cancer	1.22964	0.574715	1
hsa04144	Endocytosis	1.07447	0.586443	1
hsa00051	Fructose and mannose metabolism	1.19928	0.60112	1
hsa00480	Glutathione metabolism	1.14825	0.602062	1
hsa04915	Estrogen signaling pathway	1.17747	0.614281	1
hsa05010	Alzheimer disease	1.20823	0.627316	1
hsa04657	IL-17 signaling pathway	1.09301	0.639967	1
hsa00250	Alanine, aspartate and glutamate metabolism	1.04453	0.641654	1
hsa04370	VEGF signaling pathway	0.981228	0.648912	1
hsa00130	Ubiquinone and other terpenoid-quinone biosynthesis	1.19928	0.656943	1
hsa00430	Taurine and hypotaurine metabolism	1.54193	0.656943	1
hsa04972	Pancreatic secretion	1.18285	0.675412	1
hsa04960	Aldosterone-regulated sodium reabsorption	0.952369	0.679195	1
hsa00562	Inositol phosphate metabolism	1.04453	0.693171	1
hsa04918	Thyroid hormone synthesis	1.09765	0.693171	1
hsa04978	Mineral absorption	1.34919	0.70778	1
hsa04070	Phosphatidylinositol signaling system	1.05303	0.708636	1
hsa04914	Progesterone-mediated oocyte maturation	1.10703	0.708636	1
hsa03450	Non-homologous end-joining	0.899459	0.717611	1
hsa04927	Cortisol synthesis and secretion	1.14825	0.718821	1
hsa04660	T cell receptor signaling pathway	0.908927	0.729509	1
hsa04916	Melanogenesis	1.06603	0.729509	1
hsa04218	Cellular senescence	0.923129	0.730684	1
hsa04137	Mitophagy - animal	0.884714	0.731538	1
hsa05142	Chagas disease (American trypanosomiasis)	0.908927	0.739557	1
hsa00533	Glycosaminoglycan biosynthesis - keratan sulfate	0.899459	0.743797	1
hsa04975	Fat digestion and absorption	1.19928	0.745328	1
hsa04744	Phototransduction	1.43913	0.746659	1
hsa04919	Thyroid hormone signaling pathway	0.891207	0.758504	1
hsa05134	Legionellosis	0.799519	0.762357	1
hsa00591	Linoleic acid metabolism	1.13616	0.764078	1
hsa00730	Thiamine metabolism	0.899459	0.767557	1
hsa04062	Chemokine signaling pathway	1.03123	0.772187	1
hsa04962	Vasopressin-regulated water reabsorption	0.809513	0.787417	1
hsa04068	FoxO signaling pathway	0.849883	0.791176	1
hsa04152	AMPK signaling pathway	0.875149	0.792378	1
hsa00512	Mucin type O-glycan biosynthesis	1.19928	0.79581	1
hsa04710	Circadian rhythm	0.719567	0.79581	1
hsa05215	Prostate cancer	0.821245	0.806111	1
hsa00910	Nitrogen metabolism	0.83027	0.808674	1
hsa04115	p53 signaling pathway	0.79364	0.80892	1
hsa04136	Autophagy - other	0.74438	0.810214	1
hsa04930	Type II diabetes mellitus	0.735921	0.812144	1
hsa05166	Human T-cell leukemia virus 1 infection	0.918597	0.814332	1
hsa00140	Steroid hormone biosynthesis	1.19928	0.819009	1
hsa04210	Apoptosis	0.843243	0.820285	1
hsa00600	Sphingolipid metabolism	1.34919	0.823566	1
hsa04961	Endocrine and other factor-regulated calcium reabsorption	0.753036	0.823566	1
hsa04215	Apoptosis - multiple species	0.674594	0.823704	1
hsa05212	Pancreatic cancer	0.719567	0.836146	1
hsa00531	Glycosaminoglycan degradation	0.83027	0.842522	1
hsa05323	Rheumatoid arthritis	0.789769	0.851478	1
hsa05110	Vibrio cholerae infection	0.770965	0.854329	1
hsa04390	Hippo signaling pathway	0.879471	0.855306	1
hsa00532	Glycosaminoglycan biosynthesis - chondroitin sulfate / dermatan sulfate	0.899459	0.857131	1
hsa00670	One carbon pool by folate	0.674594	0.857131	1
hsa04260	Cardiac muscle contraction	0.914704	0.860111	1
hsa05034	Alcoholism	1.03173	0.861866	1
hsa04714	Thermogenesis	1.0668	0.862318	1
hsa05131	Shigellosis	0.707771	0.864042	1
hsa05230	Central carbon metabolism in cancer	0.719567	0.864042	1
hsa05016	Huntington disease	1.00072	0.865227	1
hsa04071	Sphingolipid signaling pathway	0.863481	0.865862	1
hsa05216	Thyroid cancer	0.599639	0.869426	1
hsa04722	Neurotrophin signaling pathway	0.757439	0.871744	1
hsa05221	Acute myeloid leukemia	0.674594	0.871798	1
hsa04931	Insulin resistance	0.778913	0.877378	1
hsa00514	Other types of O-glycan biosynthesis	0.770965	0.882412	1
hsa05224	Breast cancer	0.843243	0.884433	1
hsa00230	Purine metabolism	1.01189	0.887597	1
hsa04920	Adipocytokine signaling pathway	0.696356	0.892813	1
hsa00515	Mannose type O-glycan biosynthesis	0.899459	0.893322	1
hsa03430	Mismatch repair	0.469283	0.893322	1
hsa04964	Proximal tubule bicarbonate reclamation	0.568079	0.893322	1
hsa04216	Ferroptosis	0.654152	0.896266	1
hsa04910	Insulin signaling pathway	0.777133	0.897865	1
hsa04350	TGF-beta signaling pathway	0.739282	0.899282	1
hsa05150	Staphylococcus aureus infection	0.674594	0.902062	1
hsa04977	Vitamin digestion and absorption	0.674594	0.903221	1
hsa03440	Homologous recombination	0.583433	0.904007	1
hsa05214	Glioma	0.634912	0.905086	1
hsa04750	Inflammatory mediator regulation of TRP channels	0.809513	0.906208	1
hsa05145	Toxoplasmosis	0.712779	0.908602	1
hsa04066	HIF-1 signaling pathway	0.703925	0.911056	1
hsa04934	Cushing syndrome	0.870444	0.91451	1
hsa04621	NOD-like receptor signaling pathway	0.80222	0.918227	1
hsa04950	Maturity onset diabetes of the young	0.44973	0.920351	1
hsa05140	Leishmaniasis	0.625711	0.921163	1
hsa02010	ABC transporters	0.719567	0.924107	1
hsa04973	Carbohydrate digestion and absorption	0.74438	0.924107	1
hsa04211	Longevity regulating pathway	0.658141	0.924277	1
hsa05161	Hepatitis B	0.703925	0.925892	1
hsa04650	Natural killer cell mediated cytotoxicity	0.764142	0.92715	1
hsa05160	Hepatitis C	0.731763	0.92715	1
hsa04966	Collecting duct acid secretion	0.469283	0.927743	1
hsa00190	Oxidative phosphorylation	0.918597	0.934013	1
hsa04658	Th1 and Th2 cell differentiation	0.634912	0.936482	1
hsa05217	Basal cell carcinoma	0.634912	0.939593	1
hsa04630	JAK-STAT signaling pathway	0.765497	0.940503	1
hsa05226	Gastric cancer	0.753036	0.94161	1
hsa00983	Drug metabolism - other enzymes	0.757439	0.942595	1
hsa04330	Notch signaling pathway	0.490614	0.944789	1
hsa04672	Intestinal immune network for IgA production	0.539676	0.944789	1
hsa04142	Lysosome	0.699579	0.945554	1
hsa00510	N-Glycan biosynthesis	0.770965	0.949051	1
hsa04550	Signaling pathways regulating pluripotency of stem cells	0.719567	0.951323	1
hsa04979	Cholesterol metabolism	0.479712	0.952997	1
hsa05225	Hepatocellular carcinoma	0.710099	0.955197	1
hsa04742	Taste transduction	0.959423	0.955753	1
hsa04664	Fc epsilon RI signaling pathway	0.513977	0.957703	1
hsa04140	Autophagy - animal	0.614265	0.958482	1
hsa03410	Base excision repair	0.327076	0.959729	1
hsa05168	Herpes simplex infection	0.686293	0.962032	1
hsa04917	Prolactin signaling pathway	0.469283	0.963408	1
hsa05203	Viral carcinogenesis	0.723587	0.966235	1
hsa05143	African trypanosomiasis	0.327076	0.966861	1
hsa05322	Systemic lupus erythematosus	0.858575	0.968574	1
hsa04150	mTOR signaling pathway	0.639615	0.972874	1
hsa04659	Th17 cell differentiation	0.539676	0.974798	1
hsa05213	Endometrial cancer	0.37872	0.975576	1
hsa04080	Neuroactive ligand-receptor interaction	0.945823	0.977633	1
hsa05033	Nicotine addiction	0.43174	0.979646	1
hsa05219	Bladder cancer	0.263256	0.981537	1
hsa04640	Hematopoietic cell lineage	0.502024	0.982903	1
hsa00970	Aminoacyl-tRNA biosynthesis	0.583433	0.987491	1
hsa03022	Basal transcription factors	0.239856	0.9875	1
hsa05152	Tuberculosis	0.607135	0.987868	1
hsa04012	ErbB signaling pathway	0.39976	0.988092	1
hsa04620	Toll-like receptor signaling pathway	0.469283	0.989582	1
hsa04622	RIG-I-like receptor signaling pathway	0.342651	0.991088	1
hsa05206	MicroRNAs in cancer	1.28314	0.991635	1
hsa05164	Influenza A	0.549988	0.991837	1
hsa03015	mRNA surveillance pathway	0.394885	0.992513	1
hsa04064	NF-kappa B signaling pathway	0.359784	0.994528	1
hsa03460	Fanconi anemia pathway	0.220276	0.994806	1
hsa05162	Measles	0.435222	0.995287	1
hsa04141	Protein processing in endoplasmic reticulum	0.524685	0.995446	1
hsa03018	RNA degradation	0.327076	0.995883	1
hsa00240	Pyrimidine metabolism	0.376518	0.996599	1
hsa04110	Cell cycle	0.353886	0.997613	1
hsa04623	Cytosolic DNA-sensing pathway	0.19988	0.997843	1
hsa05321	Inflammatory bowel disease (IBD)	0.18936	0.998225	1
hsa05169	Epstein-Barr virus infection	0.452084	0.998745	1
hsa05220	Chronic myeloid leukemia	0.14202	0.999394	1
hsa04612	Antigen processing and presentation	0.171326	0.999451	1
hsa04060	Cytokine-cytokine receptor interaction	0.623625	0.999487	1
hsa04120	Ubiquitin mediated proteolysis	0.243463	0.999824	1
hsa04217	Necroptosis	0.232953	0.999979	1
hsa03040	Spliceosome	0.0849883	0.999998	1
hsa03013	RNA transport	0.147856	0.999999	1
hsa03010	Ribosome	0.0863481	1	1
hsa04740	Olfactory transduction	2.09874	1	1
hsa00061	Fatty acid biosynthesis	0	1	1
hsa00100	Steroid biosynthesis	0	1	1
hsa00220	Arginine biosynthesis	0	1	1
hsa00400	Phenylalanine, tyrosine and tryptophan biosynthesis	0	1	1
hsa00440	Phosphonate and phosphinate metabolism	0	1	1
hsa00471	D-Glutamine and D-glutamate metabolism	0	1	1
hsa00472	D-Arginine and D-ornithine metabolism	0	1	1
hsa00511	Other glycan degradation	0	1	1
hsa00524	Neomycin, kanamycin and gentamicin biosynthesis	0	1	1
hsa00534	Glycosaminoglycan biosynthesis - heparan sulfate / heparin	0	1	1
hsa00604	Glycosphingolipid biosynthesis - ganglio series	0	1	1
hsa00780	Biotin metabolism	0	1	1
hsa03008	Ribosome biogenesis in eukaryotes	0	1	1
hsa03020	RNA polymerase	0	1	1
hsa03030	DNA replication	0	1	1
hsa03050	Proteasome	0	1	1
hsa03060	Protein export	0	1	1
hsa03420	Nucleotide excision repair	0	1	1
hsa04122	Sulfur relay system	0	1	1
hsa04130	SNARE interactions in vesicular transport	0	1	1
hsa04940	Type I diabetes mellitus	0	1	1
hsa05223	Non-small cell lung cancer	0	1	1
hsa05310	Asthma	0	1	1
hsa05320	Autoimmune thyroid disease	0	1	1
hsa05330	Allograft rejection	0	1	1
hsa05332	Graft-versus-host disease	0	1	1
hsa05340	Primary immunodeficiency	0	1	1

## Sheet: All DEGs - PCa
ID	Pathway	Fold_Enrichment	p_value	adj_p
hsa04270	Vascular smooth muscle contraction	3.18289	6.71201e-05	0.0131999
hsa04392	Hippo signaling pathway - multiple species	4.91801	8.22425e-05	0.0131999
hsa05414	Dilated cardiomyopathy (DCM)	2.95081	0.000473329	0.0445733
hsa04022	cGMP-PKG signaling pathway	2.39614	0.00055543	0.0445733
hsa05410	Hypertrophic cardiomyopathy (HCM)	2.69788	0.00144352	0.0926738
hsa04911	Insulin secretion	2.64251	0.0048526	0.259614
hsa04510	Focal adhesion	1.79038	0.00987068	0.452641
hsa04810	Regulation of actin cytoskeleton	1.73942	0.0131049	0.465548
hsa04925	Aldosterone synthesis and secretion	2.32958	0.0147872	0.465548
hsa04928	Parathyroid hormone synthesis, secretion and action	2.09835	0.0165005	0.465548
hsa04927	Cortisol synthesis and secretion	2.76246	0.0177451	0.465548
hsa00061	Fatty acid biosynthesis	5.24588	0.0196957	0.465548
hsa05205	Proteoglycans in cancer	1.65883	0.0197551	0.465548
hsa00780	Biotin metabolism	7.86882	0.0203043	0.465548
hsa04728	Dopaminergic synapse	1.75585	0.0277377	0.593586
hsa04713	Circadian entrainment	2.06556	0.0311546	0.604422
hsa04921	Oxytocin signaling pathway	1.95095	0.0320099	0.604422
hsa04261	Adrenergic signaling in cardiomyocytes	1.86884	0.0350643	0.609842
hsa04390	Hippo signaling pathway	1.74863	0.0360966	0.609842
hsa05412	Arrhythmogenic right ventricular cardiomyopathy (ARVC)	2.23854	0.0390733	0.627126
hsa04340	Hedgehog signaling pathway	2.36065	0.0420837	0.643279
hsa04971	Gastric acid secretion	2.40436	0.0503968	0.707451
hsa04725	Cholinergic synapse	1.84425	0.0506896	0.707451
hsa04730	Long-term depression	2.00432	0.0644617	0.862175
hsa04024	cAMP signaling pathway	1.69671	0.0785486	1
hsa00670	One carbon pool by folate	2.95081	0.0834037	1
hsa04916	Melanogenesis	1.89434	0.0842576	1
hsa04020	Calcium signaling pathway	1.70943	0.0947524	1
hsa04924	Renin secretion	2.08292	0.0962904	1
hsa04934	Cushing syndrome	1.71337	0.101218	1
hsa04015	Rap1 signaling pathway	1.50819	0.104719	1
hsa04310	Wnt signaling pathway	1.61818	0.111627	1
hsa05030	Cocaine addiction	1.79614	0.117358	1
hsa04540	Gap junction	1.68618	0.123674	1
hsa04970	Salivary secretion	2.12845	0.138499	1
hsa05032	Morphine addiction	1.93784	0.146252	1
hsa04512	ECM-receptor interaction	1.78837	0.154341	1
hsa04360	Axon guidance	1.56826	0.157447	1
hsa04611	Platelet activation	1.54435	0.1577	1
hsa04912	GnRH signaling pathway	1.70836	0.162416	1
hsa00250	Alanine, aspartate and glutamate metabolism	1.90375	0.170834	1
hsa04371	Apelin signaling pathway	1.4754	0.18356	1
hsa04931	Insulin resistance	1.46019	0.194006	1
hsa04961	Endocrine and other factor-regulated calcium reabsorption	1.64696	0.204507	1
hsa04070	Phosphatidylinositol signaling system	1.58336	0.215782	1
hsa04750	Inflammatory mediator regulation of TRP channels	1.62294	0.215782	1
hsa05031	Amphetamine addiction	1.54796	0.215978	1
hsa04920	Adipocytokine signaling pathway	1.523	0.227612	1
hsa04979	Cholesterol metabolism	1.57376	0.24673	1
hsa04216	Ferroptosis	1.78837	0.248309	1
hsa00982	Drug metabolism - cytochrome P450	2.00906	0.251519	1
hsa05204	Chemical carcinogenesis	1.86367	0.257386	1
hsa04919	Thyroid hormone signaling pathway	1.29944	0.277252	1
hsa04218	Cellular senescence	1.24244	0.280384	1
hsa04918	Thyroid hormone synthesis	1.60044	0.288743	1
hsa05146	Amoebiasis	1.38861	0.294619	1
hsa04962	Vasopressin-regulated water reabsorption	1.4754	0.315524	1
hsa04973	Carbohydrate digestion and absorption	2.03504	0.315524	1
hsa04152	AMPK signaling pathway	1.27602	0.317447	1
hsa04144	Endocytosis	1.22839	0.326716	1
hsa04933	AGE-RAGE signaling pathway in diabetic complications	1.28296	0.328493	1
hsa04977	Vitamin digestion and absorption	2.2131	0.33257	1
hsa00480	Glutathione metabolism	1.50679	0.337047	1
hsa04720	Long-term potentiation	1.37704	0.33928	1
hsa00232	Caffeine metabolism	2.95081	0.357703	1
hsa00524	Neomycin, kanamycin and gentamicin biosynthesis	2.95081	0.357703	1
hsa00350	Tyrosine metabolism	1.57376	0.364325	1
hsa00603	Glycosphingolipid biosynthesis - globo and isoglobo series	2.14604	0.367024	1
hsa00565	Ether lipid metabolism	2.18578	0.367318	1
hsa04726	Serotonergic synapse	1.35245	0.37208	1
hsa04922	Glucagon signaling pathway	1.34128	0.374711	1
hsa04910	Insulin signaling pathway	1.22754	0.37682	1
hsa05416	Viral myocarditis	1.33621	0.383642	1
hsa05418	Fluid shear stress and atherosclerosis	1.17131	0.397078	1
hsa04140	Autophagy - animal	1.15153	0.401125	1
hsa05144	Malaria	1.40515	0.40195	1
hsa00601	Glycosphingolipid biosynthesis - lacto and neolacto series	1.77048	0.403998	1
hsa04520	Adherens junction	1.25186	0.410389	1
hsa00440	Phosphonate and phosphinate metabolism	2.95081	0.412138	1
hsa00750	Vitamin B6 metabolism	1.9672	0.412138	1
hsa04071	Sphingolipid signaling pathway	1.29835	0.416474	1
hsa04972	Pancreatic secretion	1.45519	0.426837	1
hsa00650	Butanoate metabolism	1.60953	0.427363	1
hsa04012	ErbB signaling pathway	1.16575	0.432582	1
hsa03320	PPAR signaling pathway	1.31147	0.43882	1
hsa05215	Prostate cancer	1.15466	0.439215	1
hsa04727	GABAergic synapse	1.43069	0.471954	1
hsa00020	Citrate cycle (TCA cycle)	1.26463	0.473037	1
hsa00062	Fatty acid elongation	1.86367	0.473037	1
hsa00630	Glyoxylate and dicarboxylate metabolism	1.41639	0.473037	1
hsa04530	Tight junction	1.19627	0.474237	1
hsa04670	Leukocyte transendothelial migration	1.20441	0.479741	1
hsa00531	Glycosaminoglycan degradation	1.81588	0.487004	1
hsa04723	Retrograde endocannabinoid signaling	1.32278	0.488387	1
hsa00970	Aminoacyl-tRNA biosynthesis	1.91404	0.491372	1
hsa04260	Cardiac muscle contraction	1.40038	0.494891	1
hsa03020	RNA polymerase	1.26463	0.495242	1
hsa04710	Circadian rhythm	1.18032	0.495242	1
hsa05142	Chagas disease (American trypanosomiasis)	1.1182	0.500438	1
hsa00230	Purine metabolism	1.38319	0.502259	1
hsa04724	Glutamatergic synapse	1.32621	0.502724	1
hsa04122	Sulfur relay system	1.9672	0.507569	1
hsa00983	Drug metabolism - other enzymes	1.44952	0.508653	1
hsa00532	Glycosaminoglycan biosynthesis - chondroitin sulfate / dermatan sulfate	1.9672	0.514739	1
hsa00640	Propanoate metabolism	1.31147	0.516968	1
hsa04136	Autophagy - other	1.22102	0.516968	1
hsa00071	Fatty acid degradation	1.18032	0.518542	1
hsa00051	Fructose and mannose metabolism	1.31147	0.53818	1
hsa04926	Relaxin signaling pathway	1.11927	0.547676	1
hsa04930	Type II diabetes mellitus	1.07302	0.554449	1
hsa04130	SNARE interactions in vesicular transport	1.10655	0.558848	1
hsa04976	Bile secretion	1.44529	0.564392	1
hsa04068	FoxO signaling pathway	1.02233	0.56861	1
hsa04350	TGF-beta signaling pathway	1.13182	0.575265	1
hsa00072	Synthesis and degradation of ketone bodies	1.31147	0.587519	1
hsa00280	Valine, leucine and isoleucine degradation	1.12412	0.588875	1
hsa00520	Amino sugar and nucleotide sugar metabolism	1.09797	0.588875	1
hsa00340	Histidine metabolism	1.31147	0.591767	1
hsa01040	Biosynthesis of unsaturated fatty acids	1.68618	0.591767	1
hsa04151	PI3K-Akt signaling pathway	1.08665	0.604325	1
hsa00330	Arginine and proline metabolism	1.07302	0.605491	1
hsa00562	Inositol phosphate metabolism	1.14225	0.605693	1
hsa05140	Leishmaniasis	1.02637	0.605693	1
hsa04915	Estrogen signaling pathway	1.18032	0.609222	1
hsa04213	Longevity regulating pathway - multiple species	1.03537	0.61237	1
hsa00980	Metabolism of xenobiotics by cytochrome P450	1.36191	0.618974	1
hsa05145	Toxoplasmosis	1.00216	0.626467	1
hsa05217	Basal cell carcinoma	1.15718	0.626739	1
hsa00240	Pyrimidine metabolism	1.09797	0.631309	1
hsa04211	Longevity regulating pathway	1.00759	0.637263	1
hsa04137	Mitophagy - animal	0.967478	0.654492	1
hsa05321	Inflammatory bowel disease (IBD)	1.03537	0.654492	1
hsa00790	Folate biosynthesis	1.07302	0.659291	1
hsa04666	Fc gamma R-mediated phagocytosis	0.983602	0.660548	1
hsa04625	C-type lectin receptor signaling pathway	1.01533	0.66414	1
hsa00260	Glycine, serine and threonine metabolism	1.10655	0.670388	1
hsa00380	Tryptophan metabolism	1.07302	0.670388	1
hsa03460	Fanconi anemia pathway	0.963529	0.682154	1
hsa04923	Regulation of lipolysis in adipocytes	1.02637	0.682154	1
hsa05161	Hepatitis B	0.940837	0.68441	1
hsa03440	Homologous recombination	0.957018	0.686817	1
hsa04744	Phototransduction	1.57376	0.699127	1
hsa00860	Porphyrin and chlorophyll metabolism	1.41639	0.702623	1
hsa05211	Renal cell carcinoma	0.90794	0.705898	1
hsa04146	Peroxisome	1.07302	0.71548	1
hsa05163	Human cytomegalovirus infection	0.974053	0.725022	1
hsa04217	Necroptosis	1.01898	0.728252	1
hsa04114	Oocyte meiosis	1.07302	0.733422	1
hsa00760	Nicotinate and nicotinamide metabolism	0.983602	0.735016	1
hsa00604	Glycosphingolipid biosynthesis - ganglio series	0.983602	0.735148	1
hsa04914	Progesterone-mediated oocyte maturation	1.05926	0.744161	1
hsa05231	Choline metabolism in cancer	1.04586	0.744161	1
hsa05132	Salmonella infection	0.896448	0.746968	1
hsa05210	Colorectal cancer	0.833169	0.746968	1
hsa04550	Signaling pathways regulating pluripotency of stem cells	0.983602	0.7501	1
hsa00410	beta-Alanine metabolism	0.874313	0.751553	1
hsa03010	Ribosome	1.03868	0.757803	1
hsa05100	Bacterial invasion of epithelial cells	0.797515	0.762291	1
hsa03008	Ribosome biogenesis in eukaryotes	1.21504	0.762607	1
hsa04010	MAPK signaling pathway	0.983602	0.765772	1
hsa04014	Ras signaling pathway	1.01341	0.769129	1
hsa00600	Sphingolipid metabolism	1.4754	0.772577	1
hsa00120	Primary bile acid biosynthesis	0.90794	0.778169	1
hsa00360	Phenylalanine metabolism	0.786882	0.778169	1
hsa00450	Selenocompound metabolism	0.983602	0.778169	1
hsa00910	Nitrogen metabolism	0.90794	0.778169	1
hsa04514	Cell adhesion molecules (CAMs)	1.00882	0.780509	1
hsa04215	Apoptosis - multiple species	0.737702	0.781966	1
hsa05133	Pertussis	0.855306	0.782424	1
hsa05160	Hepatitis C	0.900246	0.789666	1
hsa03013	RNA transport	0.970128	0.7921	1
hsa00040	Pentose and glucuronate interconversions	1.31147	0.795911	1
hsa04913	Ovarian steroidogenesis	1.04146	0.796519	1
hsa04072	Phospholipase D signaling pathway	0.975473	0.801511	1
hsa05020	Prion diseases	0.737702	0.809061	1
hsa05143	African trypanosomiasis	0.715347	0.809061	1
hsa05131	Shigellosis	0.773982	0.812115	1
hsa05230	Central carbon metabolism in cancer	0.786882	0.812115	1
hsa00100	Steroid biosynthesis	1.07302	0.814206	1
hsa04062	Chemokine signaling pathway	0.977337	0.821053	1
hsa05221	Acute myeloid leukemia	0.737702	0.821421	1
hsa00500	Starch and sucrose metabolism	0.944258	0.821449	1
hsa05166	Human T-cell leukemia virus 1 infection	0.904077	0.823285	1
hsa04142	Lysosome	0.874313	0.828293	1
hsa00830	Retinol metabolism	1.18032	0.830344	1
hsa04960	Aldosterone-regulated sodium reabsorption	0.694307	0.833111	1
hsa05216	Thyroid cancer	0.655735	0.833111	1
hsa05340	Primary immunodeficiency	0.694307	0.833111	1
hsa04110	Cell cycle	0.773982	0.834836	1
hsa04145	Phagosome	0.867884	0.838989	1
hsa05016	Huntington disease	1.01617	0.842355	1
hsa04621	NOD-like receptor signaling pathway	0.877267	0.852235	1
hsa05225	Hepatocellular carcinoma	0.854181	0.852235	1
hsa00620	Pyruvate metabolism	0.694307	0.854391	1
hsa04917	Prolactin signaling pathway	0.684245	0.854907	1
hsa05130	Pathogenic Escherichia coli infection	0.655735	0.855986	1
hsa00514	Other types of O-glycan biosynthesis	0.843088	0.857595	1
hsa05012	Parkinson disease	1.00216	0.859629	1
hsa04066	HIF-1 signaling pathway	0.769776	0.8607	1
hsa05214	Glioma	0.694307	0.862394	1
hsa04115	p53 signaling pathway	0.694307	0.869547	1
hsa00515	Mannose type O-glycan biosynthesis	0.983602	0.869678	1
hsa03060	Protein export	0.737702	0.869678	1
hsa03430	Mismatch repair	0.513184	0.869678	1
hsa04614	Renin-angiotensin system	0.590161	0.869678	1
hsa04964	Proximal tubule bicarbonate reclamation	0.621222	0.869678	1
hsa05200	Pathways in cancer	0.952277	0.871426	1
hsa04975	Fat digestion and absorption	0.874313	0.873166	1
hsa05202	Transcriptional misregulation in cancer	0.858416	0.873233	1
hsa05213	Endometrial cancer	0.621222	0.879575	1
hsa04974	Protein digestion and absorption	1.07302	0.88832	1
hsa05212	Pancreatic cancer	0.629505	0.889116	1
hsa04940	Type I diabetes mellitus	0.621222	0.889687	1
hsa00563	Glycosylphosphatidylinositol (GPI)-anchor biosynthesis	0.786882	0.890858	1
hsa00592	alpha-Linolenic acid metabolism	0.786882	0.890858	1
hsa03015	mRNA surveillance pathway	0.719709	0.893821	1
hsa04658	Th1 and Th2 cell differentiation	0.694307	0.899087	1
hsa00561	Glycerolipid metabolism	0.843088	0.899664	1
hsa04657	IL-17 signaling pathway	0.74704	0.904124	1
hsa03022	Basal transcription factors	0.524588	0.904191	1
hsa05034	Alcoholism	0.954673	0.904726	1
hsa00270	Cysteine and methionine metabolism	0.590161	0.916897	1
hsa03420	Nucleotide excision repair	0.513184	0.916897	1
hsa05170	Human immunodeficiency virus 1 infection	0.799177	0.918008	1
hsa04380	Osteoclast differentiation	0.706176	0.921215	1
hsa00564	Glycerophospholipid metabolism	0.967478	0.922142	1
hsa05223	Non-small cell lung cancer	0.53651	0.926517	1
hsa05165	Human papillomavirus infection	0.86557	0.927414	1
hsa00510	N-Glycan biosynthesis	0.843088	0.928006	1
hsa00010	Glycolysis / Gluconeogenesis	0.590161	0.935277	1
hsa05120	Epithelial cell signaling in Helicobacter pylori infection	0.544764	0.935277	1
hsa00052	Galactose metabolism	0.491801	0.9359	1
hsa00512	Mucin type O-glycan biosynthesis	0.655735	0.9359	1
hsa05310	Asthma	0.513184	0.9359	1
hsa04978	Mineral absorption	0.737702	0.937702	1
hsa05226	Gastric cancer	0.731983	0.943305	1
hsa04722	Neurotrophin signaling pathway	0.621222	0.944498	1
hsa04150	mTOR signaling pathway	0.69945	0.945872	1
hsa04141	Protein processing in endoplasmic reticulum	0.737702	0.946086	1
hsa03410	Base excision repair	0.357674	0.946323	1
hsa04620	Toll-like receptor signaling pathway	0.64148	0.946561	1
hsa05218	Melanoma	0.53651	0.949975	1
hsa04659	Th17 cell differentiation	0.590161	0.954719	1
hsa03030	DNA replication	0.337235	0.958869	1
hsa05164	Influenza A	0.676618	0.958904	1
hsa05167	Kaposi sarcoma-associated herpesvirus infection	0.682267	0.95896	1
hsa05222	Small cell lung cancer	0.53651	0.960801	1
hsa05220	Chronic myeloid leukemia	0.465917	0.961511	1
hsa00310	Lysine degradation	0.491801	0.965421	1
hsa04370	VEGF signaling pathway	0.429208	0.965421	1
hsa05330	Allograft rejection	0.368851	0.965559	1
hsa00140	Steroid hormone biosynthesis	0.655735	0.967907	1
hsa03018	RNA degradation	0.53651	0.968468	1
hsa04610	Complement and coagulation cascades	0.513184	0.968468	1
hsa04630	JAK-STAT signaling pathway	0.669687	0.969535	1
hsa05224	Breast cancer	0.645489	0.970563	1
hsa05152	Tuberculosis	0.663931	0.971741	1
hsa04623	Cytosolic DNA-sensing pathway	0.437157	0.974374	1
hsa04721	Synaptic vesicle cycle	0.429208	0.974374	1
hsa04210	Apoptosis	0.553276	0.977637	1
hsa05168	Herpes simplex infection	0.614041	0.97885	1
hsa02010	ABC transporters	0.393441	0.979783	1
hsa03050	Proteasome	0.274494	0.981501	1
hsa04664	Fc epsilon RI signaling pathway	0.374706	0.982454	1
hsa04622	RIG-I-like receptor signaling pathway	0.374706	0.984939	1
hsa05323	Rheumatoid arthritis	0.431825	0.985091	1
hsa04330	Notch signaling pathway	0.268255	0.985828	1
hsa04672	Intestinal immune network for IgA production	0.295081	0.985828	1
hsa04662	B cell receptor signaling pathway	0.342122	0.98605	1
hsa04668	TNF signaling pathway	0.445405	0.986463	1
hsa05110	Vibrio cholerae infection	0.281029	0.988135	1
hsa04714	Thermogenesis	0.754857	0.988615	1
hsa05014	Amyotrophic lateral sclerosis (ALS)	0.236065	0.989144	1
hsa04064	NF-kappa B signaling pathway	0.393441	0.98948	1
hsa05162	Measles	0.475937	0.989554	1
hsa05320	Autoimmune thyroid disease	0.287884	0.990911	1
hsa05010	Alzheimer disease	0.616586	0.991986	1
hsa04120	Ubiquitin mediated proteolysis	0.44373	0.992333	1
hsa05134	Legionellosis	0.218578	0.992391	1
hsa05150	Staphylococcus aureus infection	0.245901	0.993038	1
hsa04660	T cell receptor signaling pathway	0.372733	0.993118	1
hsa04742	Taste transduction	0.524588	0.994498	1
hsa05169	Epstein-Barr virus infection	0.494376	0.996161	1
hsa05203	Viral carcinogenesis	0.527518	0.996161	1
hsa05206	MicroRNAs in cancer	1.15556	0.996211	1
hsa00590	Arachidonic acid metabolism	0.262294	0.996264	1
hsa04932	Non-alcoholic fatty liver disease (NAFLD)	0.354984	0.999037	1
hsa05322	Systemic lupus erythematosus	0.402383	0.999344	1
hsa03040	Spliceosome	0.278816	0.999392	1
hsa04640	Hematopoietic cell lineage	0.137247	0.999819	1
hsa04060	Cytokine-cytokine receptor interaction	0.524588	0.99987	1
hsa04080	Neuroactive ligand-receptor interaction	0.547572	0.999879	1
hsa04650	Natural killer cell mediated cytotoxicity	0.208907	0.999885	1
hsa00190	Oxidative phosphorylation	0.125566	0.999993	1
hsa04740	Olfactory transduction	2.29507	1	1
hsa00030	Pentose phosphate pathway	0	1	1
hsa00053	Ascorbate and aldarate metabolism	0	1	1
hsa00130	Ubiquinone and other terpenoid-quinone biosynthesis	0	1	1
hsa00220	Arginine biosynthesis	0	1	1
hsa00290	Valine, leucine and isoleucine biosynthesis	0	1	1
hsa00400	Phenylalanine, tyrosine and tryptophan biosynthesis	0	1	1
hsa00430	Taurine and hypotaurine metabolism	0	1	1
hsa00471	D-Glutamine and D-glutamate metabolism	0	1	1
hsa00472	D-Arginine and D-ornithine metabolism	0	1	1
hsa00511	Other glycan degradation	0	1	1
hsa00533	Glycosaminoglycan biosynthesis - keratan sulfate	0	1	1
hsa00534	Glycosaminoglycan biosynthesis - heparan sulfate / heparin	0	1	1
hsa00591	Linoleic acid metabolism	0	1	1
hsa00730	Thiamine metabolism	0	1	1
hsa00740	Riboflavin metabolism	0	1	1
hsa00770	Pantothenate and CoA biosynthesis	0	1	1
hsa00785	Lipoic acid metabolism	0	1	1
hsa00900	Terpenoid backbone biosynthesis	0	1	1
hsa00920	Sulfur metabolism	0	1	1
hsa03450	Non-homologous end-joining	0	1	1
hsa04612	Antigen processing and presentation	0	1	1
hsa04950	Maturity onset diabetes of the young	0	1	1
hsa04966	Collecting duct acid secretion	0	1	1
hsa05033	Nicotine addiction	0	1	1
hsa05219	Bladder cancer	0	1	1
hsa05332	Graft-versus-host disease	0	1	1

## Sheet: PIN DEGs - RA
ID	Pathway	Fold_Enrichment	p_value	adj_p
hsa03040	Spliceosome	3.3543	0.000131697	0.0422748
hsa05130	Pathogenic Escherichia coli infection	3.94441	0.0020547	0.261395
hsa03410	Base excision repair	4.61034	0.00416436	0.261395
hsa00270	Cysteine and methionine metabolism	4.56424	0.00418283	0.261395
hsa00330	Arginine and proline metabolism	4.14931	0.00515589	0.261395
hsa05131	Shigellosis	3.49177	0.0053256	0.261395
hsa05110	Vibrio cholerae infection	4.3469	0.0057002	0.261395
hsa04659	Th17 cell differentiation	2.73854	0.00865166	0.317891
hsa05166	Human T-cell leukemia virus 1 infection	2.07171	0.0103016	0.317891
hsa04658	Th1 and Th2 cell differentiation	2.86384	0.0107277	0.317891
hsa03013	RNA transport	2.50095	0.0109416	0.317891
hsa05133	Pertussis	3.08693	0.0123087	0.317891
hsa04064	NF-kappa B signaling pathway	2.70474	0.0128741	0.317891
hsa03022	Basal transcription factors	3.38092	0.0155563	0.332795
hsa05418	Fluid shear stress and atherosclerosis	2.32277	0.0164457	0.332795
hsa04722	Neurotrophin signaling pathway	2.40223	0.0165879	0.332795
hsa03420	Nucleotide excision repair	3.30742	0.0185214	0.349728
hsa04130	SNARE interactions in vesicular transport	3.80353	0.0245082	0.437062
hsa04921	Oxytocin signaling pathway	2.51473	0.028557	0.482464
hsa00620	Pyruvate metabolism	3.5798	0.0382775	0.58624
hsa03430	Mismatch repair	3.96891	0.0383521	0.58624
hsa05168	Herpes simplex infection	1.93475	0.0421331	0.614761
hsa00561	Glycerolipid metabolism	3.62241	0.0496871	0.69346
hsa00650	Butanoate metabolism	4.14931	0.0629677	0.782812
hsa04744	Phototransduction	6.08565	0.0629677	0.782812
hsa04145	Phagosome	2.01364	0.0635244	0.782812
hsa05163	Human cytomegalovirus infection	1.77252	0.0683411	0.782812
hsa00280	Valine, leucine and isoleucine degradation	2.89793	0.072189	0.782812
hsa00010	Glycolysis / Gluconeogenesis	2.53569	0.0725586	0.782812
hsa00020	Citrate cycle (TCA cycle)	3.26017	0.0744254	0.782812
hsa03015	mRNA surveillance pathway	2.22646	0.0789752	0.782812
hsa00410	beta-Alanine metabolism	3.38092	0.080476	0.782812
hsa04710	Circadian rhythm	3.04283	0.080476	0.782812
hsa05167	Kaposi sarcoma-associated herpesvirus infection	1.75886	0.0870539	0.795468
hsa04919	Thyroid hormone signaling pathway	1.95411	0.0877659	0.795468
hsa04022	cGMP-PKG signaling pathway	2.05906	0.0892113	0.795468
hsa05100	Bacterial invasion of epithelial cells	2.05596	0.0960236	0.811147
hsa05140	Leishmaniasis	2.20495	0.0960236	0.811147
hsa04270	Vascular smooth muscle contraction	2.39324	0.103876	0.838795
hsa05016	Huntington disease	2.01512	0.104523	0.838795
hsa04530	Tight junction	1.85037	0.108343	0.848246
hsa03030	DNA replication	2.60814	0.113671	0.868773
hsa05416	Viral myocarditis	2.29647	0.128513	0.878654
hsa04714	Thermogenesis	1.94599	0.134686	0.878654
hsa05152	Tuberculosis	1.71159	0.136048	0.878654
hsa00670	One carbon pool by folate	3.80353	0.138997	0.878654
hsa04015	Rap1 signaling pathway	1.69046	0.141909	0.878654
hsa00380	Tryptophan metabolism	2.76621	0.143317	0.878654
hsa05165	Human papillomavirus infection	1.52141	0.150213	0.878654
hsa00220	Arginine biosynthesis	3.38092	0.150448	0.878654
hsa04975	Fat digestion and absorption	3.38092	0.151095	0.878654
hsa04721	Synaptic vesicle cycle	2.21297	0.152477	0.878654
hsa05132	Salmonella infection	1.92584	0.152758	0.878654
hsa00400	Phenylalanine, tyrosine and tryptophan biosynthesis	7.60707	0.153889	0.878654
hsa00524	Neomycin, kanamycin and gentamicin biosynthesis	7.60707	0.153889	0.878654
hsa04218	Cellular senescence	1.60149	0.157208	0.878654
hsa05202	Transcriptional misregulation in cancer	1.65972	0.159895	0.878654
hsa04210	Apoptosis	1.66405	0.160861	0.878654
hsa00514	Other types of O-glycan biosynthesis	4.3469	0.162077	0.878654
hsa05230	Central carbon metabolism in cancer	2.02855	0.165048	0.878654
hsa05145	Toxoplasmosis	1.72236	0.168008	0.878654
hsa00340	Histidine metabolism	3.38092	0.17386	0.878654
hsa05414	Dilated cardiomyopathy (DCM)	2.11307	0.174217	0.878654
hsa00071	Fatty acid degradation	2.28212	0.175183	0.878654
hsa00750	Vitamin B6 metabolism	5.07138	0.181705	0.897345
hsa05031	Amphetamine addiction	1.9953	0.184565	0.897655
hsa04930	Type II diabetes mellitus	2.07466	0.191797	0.899877
hsa05161	Hepatitis B	1.54346	0.195996	0.899877
hsa05010	Alzheimer disease	1.81661	0.201498	0.899877
hsa05164	Influenza A	1.55049	0.201498	0.899877
hsa04662	B cell receptor signaling pathway	1.76396	0.204786	0.899877
hsa04713	Circadian entrainment	1.90177	0.208374	0.899877
hsa00520	Amino sugar and nucleotide sugar metabolism	2.1229	0.208785	0.899877
hsa05412	Arrhythmogenic right ventricular cardiomyopathy (ARVC)	2.0985	0.211667	0.899877
hsa00510	N-Glycan biosynthesis	3.26017	0.217401	0.899877
hsa04611	Platelet activation	1.70626	0.218283	0.899877
hsa04966	Collecting duct acid secretion	2.64594	0.222104	0.899877
hsa04150	mTOR signaling pathway	1.57776	0.224159	0.899877
hsa04918	Thyroid hormone synthesis	2.06293	0.225617	0.899877
hsa04750	Inflammatory mediator regulation of TRP channels	1.90177	0.226216	0.899877
hsa04066	HIF-1 signaling pathway	1.65371	0.232262	0.899877
hsa04971	Gastric acid secretion	2.25395	0.232679	0.899877
hsa05212	Pancreatic cancer	1.62284	0.232679	0.899877
hsa04660	T cell receptor signaling pathway	1.60149	0.238354	0.905574
hsa05220	Chronic myeloid leukemia	1.60149	0.239794	0.905574
hsa04922	Glucagon signaling pathway	1.72888	0.250666	0.918852
hsa04625	C-type lectin receptor signaling pathway	1.63593	0.256882	0.918852
hsa00062	Fatty acid elongation	3.20298	0.258923	0.918852
hsa00630	Glyoxylate and dicarboxylate metabolism	2.43426	0.258923	0.918852
hsa03460	Fanconi anemia pathway	1.86296	0.261433	0.918852
hsa04728	Dopaminergic synapse	1.50884	0.261686	0.918852
hsa05170	Human immunodeficiency virus 1 infection	1.42633	0.263347	0.918852
hsa05162	Measles	1.47234	0.267268	0.922504
hsa05310	Asthma	2.64594	0.27123	0.926222
hsa04136	Autophagy - other	2.0985	0.28353	0.930932
hsa00072	Synthesis and degradation of ketone bodies	3.38092	0.284138	0.930932
hsa05410	Hypertrophic cardiomyopathy (HCM)	1.73876	0.290797	0.930932
hsa04668	TNF signaling pathway	1.4353	0.294874	0.930932
hsa04120	Ubiquitin mediated proteolysis	1.3727	0.295594	0.930932
hsa04371	Apelin signaling pathway	1.52141	0.295594	0.930932
hsa04910	Insulin signaling pathway	1.46056	0.295594	0.930932
hsa00051	Fructose and mannose metabolism	2.25395	0.29581	0.930932
hsa00310	Lysine degradation	1.90177	0.306458	0.949888
hsa04670	Leukocyte transendothelial migration	1.55246	0.307752	0.949888
hsa05225	Hepatocellular carcinoma	1.4013	0.315534	0.964634
hsa05012	Parkinson disease	1.72236	0.324474	0.972994
hsa00350	Tyrosine metabolism	2.02855	0.332417	0.972994
hsa04213	Longevity regulating pathway - multiple species	1.60149	0.333643	0.972994
hsa04261	Adrenergic signaling in cardiomyocytes	1.52141	0.336139	0.972994
hsa05203	Viral carcinogenesis	1.35992	0.341319	0.972994
hsa00230	Purine metabolism	1.66405	0.342127	0.972994
hsa04970	Salivary secretion	1.9953	0.343075	0.972994
hsa04666	Fc gamma R-mediated phagocytosis	1.44897	0.350584	0.972994
hsa04014	Ras signaling pathway	1.3831	0.353842	0.972994
hsa05330	Allograft rejection	1.90177	0.356524	0.972994
hsa04152	AMPK signaling pathway	1.37064	0.359888	0.972994
hsa04924	Renin secretion	1.7899	0.360783	0.972994
hsa05321	Inflammatory bowel disease (IBD)	1.60149	0.360783	0.972994
hsa04932	Non-alcoholic fatty liver disease (NAFLD)	1.3727	0.365483	0.972994
hsa04657	IL-17 signaling pathway	1.54067	0.365603	0.972994
hsa05200	Pathways in cancer	1.22747	0.368879	0.972994
hsa00970	Aminoacyl-tRNA biosynthesis	2.46716	0.369798	0.972994
hsa04110	Cell cycle	1.24706	0.386107	0.976905
hsa05120	Epithelial cell signaling in Helicobacter pylori infection	1.40438	0.387754	0.976905
hsa04925	Aldosterone synthesis and secretion	1.60149	0.388094	0.976905
hsa03440	Homologous recombination	1.64477	0.392066	0.976905
hsa05332	Graft-versus-host disease	1.73876	0.392066	0.976905
hsa05215	Prostate cancer	1.32297	0.39557	0.976905
hsa04020	Calcium signaling pathway	1.46895	0.395971	0.976905
hsa04920	Adipocytokine signaling pathway	1.47234	0.396687	0.976905
hsa04380	Osteoclast differentiation	1.30035	0.405739	0.976905
hsa04140	Autophagy - animal	1.23692	0.412268	0.976905
hsa05214	Glioma	1.34242	0.414444	0.976905
hsa04940	Type I diabetes mellitus	1.60149	0.415265	0.976905
hsa04520	Adherens junction	1.3831	0.42326	0.976905
hsa00240	Pyrimidine metabolism	1.41527	0.425307	0.976905
hsa04916	Melanogenesis	1.50263	0.425307	0.976905
hsa04962	Vasopressin-regulated water reabsorption	1.52141	0.426698	0.976905
hsa05160	Hepatitis C	1.28933	0.431785	0.976905
hsa00360	Phenylalanine metabolism	2.02855	0.433565	0.976905
hsa00910	Nitrogen metabolism	2.34064	0.433565	0.976905
hsa03050	Proteasome	1.41527	0.438012	0.976905
hsa04068	FoxO signaling pathway	1.19796	0.438262	0.976905
hsa04217	Necroptosis	1.31345	0.441916	0.976905
hsa04630	JAK-STAT signaling pathway	1.29482	0.441916	0.976905
hsa00190	Oxidative phosphorylation	1.61853	0.444722	0.976905
hsa04620	Toll-like receptor signaling pathway	1.32297	0.447368	0.976905
hsa00511	Other glycan degradation	2.53569	0.452202	0.98015
hsa04141	Protein processing in endoplasmic reticulum	1.26784	0.459369	0.98015
hsa04928	Parathyroid hormone synthesis, secretion and action	1.35237	0.461929	0.98015
hsa04915	Estrogen signaling pathway	1.3831	0.463987	0.98015
hsa04612	Antigen processing and presentation	1.44897	0.466594	0.98015
hsa04931	Insulin resistance	1.25477	0.469159	0.98015
hsa00770	Pantothenate and CoA biosynthesis	2.76621	0.470227	0.98015
hsa04260	Cardiac muscle contraction	1.5472	0.475091	0.980872
hsa04621	NOD-like receptor signaling pathway	1.23358	0.476685	0.980872
hsa00532	Glycosaminoglycan biosynthesis - chondroitin sulfate / dermatan sulfate	2.53569	0.487661	0.994626
hsa05169	Epstein-Barr virus infection	1.11517	0.492258	0.994626
hsa04979	Cholesterol metabolism	1.35237	0.492665	0.994626
hsa00900	Terpenoid backbone biosynthesis	1.52141	0.520828	1
hsa05320	Autoimmune thyroid disease	1.48431	0.523807	1
hsa04072	Phospholipase D signaling pathway	1.25737	0.52655	1
hsa04012	ErbB signaling pathway	1.12697	0.532691	1
hsa03060	Protein export	1.90177	0.536599	1
hsa04964	Proximal tubule bicarbonate reclamation	1.60149	0.536599	1
hsa05210	Colorectal cancer	1.07394	0.540628	1
hsa05134	Legionellosis	1.12697	0.543842	1
hsa00534	Glycosaminoglycan biosynthesis - heparan sulfate / heparin	3.04283	0.551853	1
hsa04211	Longevity regulating pathway	1.11323	0.563965	1
hsa00563	Glycosylphosphatidylinositol (GPI)-anchor biosynthesis	2.02855	0.566605	1
hsa03010	Ribosome	1.21713	0.568375	1
hsa05323	Rheumatoid arthritis	1.11323	0.571582	1
hsa00790	Folate biosynthesis	1.3831	0.580872	1
hsa04114	Oocyte meiosis	1.22943	0.585385	1
hsa04912	GnRH signaling pathway	1.20112	0.593931	1
hsa00053	Ascorbate and aldarate metabolism	2.34064	0.594671	1
hsa04151	PI3K-Akt signaling pathway	1.06257	0.618509	1
hsa04926	Relaxin signaling pathway	1.04925	0.62273	1
hsa04927	Cortisol synthesis and secretion	1.29482	0.626577	1
hsa05221	Acute myeloid leukemia	0.950884	0.643303	1
hsa00052	Galactose metabolism	1.26784	0.645479	1
hsa00512	Mucin type O-glycan biosynthesis	1.69046	0.645479	1
hsa03008	Ribosome biogenesis in eukaryotes	1.34242	0.649726	1
hsa04720	Long-term potentiation	1.01428	0.651442	1
hsa05205	Proteoglycans in cancer	0.986863	0.651511	1
hsa05142	Chagas disease (American trypanosomiasis)	0.960893	0.656303	1
hsa00640	Propanoate metabolism	1.12697	0.657155	1
hsa05211	Renal cell carcinoma	0.936255	0.667275	1
hsa00250	Alanine, aspartate and glutamate metabolism	0.981557	0.689929	1
hsa05143	African trypanosomiasis	0.922069	0.689929	1
hsa04144	Endocytosis	0.963791	0.695085	1
hsa00500	Starch and sucrose metabolism	1.21713	0.700144	1
hsa04810	Regulation of actin cytoskeleton	0.960893	0.705436	1
hsa05034	Alcoholism	1.11869	0.709509	1
hsa05216	Thyroid cancer	0.84523	0.710023	1
hsa05340	Primary immunodeficiency	0.894949	0.710023	1
hsa00980	Metabolism of xenobiotics by cytochrome P450	1.17032	0.711303	1
hsa04725	Cholinergic synapse	0.950884	0.717183	1
hsa00260	Glycine, serine and threonine metabolism	0.950884	0.737753	1
hsa04216	Ferroptosis	0.922069	0.737753	1
hsa05219	Bladder cancer	0.742153	0.746395	1
hsa04062	Chemokine signaling pathway	0.969053	0.748607	1
hsa04390	Hippo signaling pathway	0.901579	0.749636	1
hsa04010	MAPK signaling pathway	0.922069	0.758153	1
hsa04146	Peroxisome	0.922069	0.762321	1
hsa04350	TGF-beta signaling pathway	0.833651	0.768117	1
hsa02010	ABC transporters	1.01428	0.770653	1
hsa04973	Carbohydrate digestion and absorption	1.04925	0.770653	1
hsa05206	MicroRNAs in cancer	1.70228	0.770958	1
hsa04911	Insulin secretion	0.908307	0.77379	1
hsa04142	Lysosome	0.84523	0.774133	1
hsa04024	cAMP signaling pathway	0.950884	0.787325	1
hsa04540	Gap junction	0.790345	0.790088	1
hsa04727	GABAergic synapse	0.922069	0.790088	1
hsa00565	Ether lipid metabolism	1.12697	0.792595	1
hsa04961	Endocrine and other factor-regulated calcium reabsorption	0.707634	0.792595	1
hsa04330	Notch signaling pathway	0.691552	0.799433	1
hsa04672	Intestinal immune network for IgA production	0.760707	0.799433	1
hsa05032	Morphine addiction	0.908307	0.805342	1
hsa04913	Ovarian steroidogenesis	0.894949	0.806046	1
hsa05030	Cocaine addiction	0.661484	0.806046	1
hsa05144	Malaria	0.724483	0.806046	1
hsa05222	Small cell lung cancer	0.691552	0.814957	1
hsa04972	Pancreatic secretion	0.833651	0.828585	1
hsa04360	Axon guidance	0.851141	0.831437	1
hsa00564	Glycerophospholipid metabolism	0.997648	0.832923	1
hsa04923	Regulation of lipolysis in adipocytes	0.661484	0.835987	1
hsa04070	Phosphatidylinositol signaling system	0.742153	0.841303	1
hsa04914	Progesterone-mediated oocyte maturation	0.780212	0.841303	1
hsa05231	Choline metabolism in cancer	0.770336	0.841303	1
hsa00480	Glutathione metabolism	0.64741	0.84663	1
hsa05150	Staphylococcus aureus infection	0.633922	0.84663	1
hsa04514	Cell adhesion molecules (CAMs)	0.780212	0.85347	1
hsa05213	Endometrial cancer	0.533829	0.856582	1
hsa04370	VEGF signaling pathway	0.553241	0.861315	1
hsa00140	Steroid hormone biosynthesis	0.84523	0.865891	1
hsa04723	Retrograde endocannabinoid signaling	0.786938	0.869049	1
hsa04623	Cytosolic DNA-sensing pathway	0.563487	0.878735	1
hsa04137	Mitophagy - animal	0.498824	0.886608	1
hsa04724	Glutamatergic synapse	0.683781	0.892927	1
hsa00830	Retinol metabolism	0.760707	0.893971	1
hsa04510	Focal adhesion	0.683781	0.896415	1
hsa04664	Fc epsilon RI signaling pathway	0.482988	0.897472	1
hsa04071	Sphingolipid signaling pathway	0.608565	0.903789	1
hsa04622	RIG-I-like receptor signaling pathway	0.482988	0.904131	1
hsa04917	Prolactin signaling pathway	0.440989	0.904131	1
hsa00982	Drug metabolism - cytochrome P450	0.64741	0.907296	1
hsa04976	Bile secretion	0.620985	0.907296	1
hsa03320	PPAR signaling pathway	0.482988	0.916181	1
hsa00983	Drug metabolism - other enzymes	0.533829	0.929141	1
hsa03018	RNA degradation	0.461034	0.929141	1
hsa04650	Natural killer cell mediated cytotoxicity	0.538554	0.93239	1
hsa04512	ECM-receptor interaction	0.461034	0.935936	1
hsa05204	Chemical carcinogenesis	0.533829	0.935936	1
hsa05322	Systemic lupus erythematosus	0.691552	0.936003	1
hsa04310	Wnt signaling pathway	0.490779	0.955385	1
hsa05226	Gastric cancer	0.471756	0.958984	1
hsa05146	Amoebiasis	0.35798	0.959989	1
hsa04640	Hematopoietic cell lineage	0.353817	0.961313	1
hsa04934	Cushing syndrome	0.490779	0.964373	1
hsa04060	Cytokine-cytokine receptor interaction	0.676184	0.967071	1
hsa04726	Serotonergic synapse	0.316961	0.978171	1
hsa04550	Signaling pathways regulating pluripotency of stem cells	0.253569	0.990602	1
hsa05224	Breast cancer	0.237721	0.992826	1
hsa04080	Neuroactive ligand-receptor interaction	0.156847	0.999913	1
hsa04740	Olfactory transduction	2.53569	0.999961	1
hsa00030	Pentose phosphate pathway	0	1	1
hsa00040	Pentose and glucuronate interconversions	0	1	1
hsa00061	Fatty acid biosynthesis	0	1	1
hsa00100	Steroid biosynthesis	0	1	1
hsa00120	Primary bile acid biosynthesis	0	1	1
hsa00130	Ubiquinone and other terpenoid-quinone biosynthesis	0	1	1
hsa00232	Caffeine metabolism	0	1	1
hsa00290	Valine, leucine and isoleucine biosynthesis	0	1	1
hsa00430	Taurine and hypotaurine metabolism	0	1	1
hsa00440	Phosphonate and phosphinate metabolism	0	1	1
hsa00450	Selenocompound metabolism	0	1	1
hsa00471	D-Glutamine and D-glutamate metabolism	0	1	1
hsa00472	D-Arginine and D-ornithine metabolism	0	1	1
hsa00515	Mannose type O-glycan biosynthesis	0	1	1
hsa00531	Glycosaminoglycan degradation	0	1	1
hsa00533	Glycosaminoglycan biosynthesis - keratan sulfate	0	1	1
hsa00562	Inositol phosphate metabolism	0	1	1
hsa00590	Arachidonic acid metabolism	0	1	1
hsa00591	Linoleic acid metabolism	0	1	1
hsa00592	alpha-Linolenic acid metabolism	0	1	1
hsa00600	Sphingolipid metabolism	0	1	1
hsa00601	Glycosphingolipid biosynthesis - lacto and neolacto series	0	1	1
hsa00603	Glycosphingolipid biosynthesis - globo and isoglobo series	0	1	1
hsa00604	Glycosphingolipid biosynthesis - ganglio series	0	1	1
hsa00730	Thiamine metabolism	0	1	1
hsa00740	Riboflavin metabolism	0	1	1
hsa00760	Nicotinate and nicotinamide metabolism	0	1	1
hsa00780	Biotin metabolism	0	1	1
hsa00785	Lipoic acid metabolism	0	1	1
hsa00860	Porphyrin and chlorophyll metabolism	0	1	1
hsa00920	Sulfur metabolism	0	1	1
hsa01040	Biosynthesis of unsaturated fatty acids	0	1	1
hsa03020	RNA polymerase	0	1	1
hsa03450	Non-homologous end-joining	0	1	1
hsa04115	p53 signaling pathway	0	1	1
hsa04122	Sulfur relay system	0	1	1
hsa04215	Apoptosis - multiple species	0	1	1
hsa04340	Hedgehog signaling pathway	0	1	1
hsa04392	Hippo signaling pathway - multiple species	0	1	1
hsa04610	Complement and coagulation cascades	0	1	1
hsa04614	Renin-angiotensin system	0	1	1
hsa04730	Long-term depression	0	1	1
hsa04742	Taste transduction	0	1	1
hsa04933	AGE-RAGE signaling pathway in diabetic complications	0	1	1
hsa04950	Maturity onset diabetes of the young	0	1	1
hsa04960	Aldosterone-regulated sodium reabsorption	0	1	1
hsa04974	Protein digestion and absorption	0	1	1
hsa04977	Vitamin digestion and absorption	0	1	1
hsa04978	Mineral absorption	0	1	1
hsa05014	Amyotrophic lateral sclerosis (ALS)	0	1	1
hsa05020	Prion diseases	0	1	1
hsa05033	Nicotine addiction	0	1	1
hsa05217	Basal cell carcinoma	0	1	1
hsa05218	Melanoma	0	1	1
hsa05223	Non-small cell lung cancer	0	1	1

## Sheet: PIN DEGs - CRC
ID	Pathway	Fold_Enrichment	p_value	adj_p
hsa00280	Valine, leucine and isoleucine degradation	8.1041	5.76835e-15	1.85164e-12
hsa00640	Propanoate metabolism	8.22155	4.79391e-10	7.69422e-08
hsa00071	Fatty acid degradation	6.28948	1.34215e-09	1.4361e-07
hsa04510	Focal adhesion	3.07615	1.4929e-08	1.19805e-06
hsa04512	ECM-receptor interaction	4.48448	3.63045e-07	2.33075e-05
hsa00650	Butanoate metabolism	7.39939	9.36237e-07	5.00887e-05
hsa00410	beta-Alanine metabolism	6.02914	3.05809e-06	0.000140235
hsa04810	Regulation of actin cytoskeleton	2.57032	6.28956e-06	0.000252369
hsa04924	Renin secretion	4.35258	2.12804e-05	0.000759001
hsa00380	Tryptophan metabolism	4.93293	4.75473e-05	0.00152627
hsa05205	Proteoglycans in cancer	2.31981	8.54001e-05	0.00249213
hsa00072	Synthesis and degradation of ketone bodies	8.22155	0.000263847	0.00705791
hsa03320	PPAR signaling pathway	3.28862	0.000378791	0.00935324
hsa04022	cGMP-PKG signaling pathway	2.55919	0.000612512	0.014044
hsa00310	Lysine degradation	3.39139	0.00177005	0.0378791
hsa04540	Gap junction	2.69069	0.00221709	0.0416679
hsa05200	Pathways in cancer	1.66526	0.00223225	0.0416679
hsa00350	Tyrosine metabolism	3.94634	0.00233652	0.0416679
hsa05414	Dilated cardiomyopathy (DCM)	2.87754	0.00274902	0.0438882
hsa04923	Regulation of lipolysis in adipocytes	3.21713	0.00297389	0.0438882
hsa04010	MAPK signaling pathway	1.84985	0.00298529	0.0438882
hsa04520	Adherens junction	2.69069	0.00300792	0.0438882
hsa00620	Pyruvate metabolism	3.48207	0.0039693	0.0553976
hsa04530	Tight junction	2.09983	0.00531202	0.0697566
hsa04151	PI3K-Akt signaling pathway	1.73827	0.00543276	0.0697566
hsa04974	Protein digestion and absorption	3.4979	0.00726275	0.0878372
hsa04270	Vascular smooth muscle contraction	2.66046	0.00738818	0.0878372
hsa05412	Arrhythmogenic right ventricular cardiomyopathy (ARVC)	2.80667	0.00860237	0.09862
hsa04726	Serotonergic synapse	2.31231	0.00973081	0.10771
hsa05130	Pathogenic Escherichia coli infection	2.46646	0.0108135	0.115705
hsa00270	Cysteine and methionine metabolism	2.95976	0.0126015	0.130487
hsa00020	Citrate cycle (TCA cycle)	3.17117	0.0137266	0.134062
hsa00900	Terpenoid backbone biosynthesis	3.6997	0.0139819	0.134062
hsa04921	Oxytocin signaling pathway	2.20147	0.0141997	0.134062
hsa00010	Glycolysis / Gluconeogenesis	2.46646	0.0154397	0.136059
hsa04024	cAMP signaling pathway	2.03483	0.0154823	0.136059
hsa04933	AGE-RAGE signaling pathway in diabetic complications	2.09113	0.0156828	0.136059
hsa04670	Leukocyte transendothelial migration	2.11411	0.0186048	0.156283
hsa00920	Sulfur metabolism	6.34234	0.0189877	0.156283
hsa05014	Amyotrophic lateral sclerosis (ALS)	2.36781	0.0201446	0.160214
hsa00982	Drug metabolism - cytochrome P450	3.14868	0.0204635	0.160214
hsa04146	Peroxisome	2.46646	0.0235249	0.179798
hsa00360	Phenylalanine metabolism	3.94634	0.0242849	0.181289
hsa05418	Fluid shear stress and atherosclerosis	1.80749	0.0254023	0.185321
hsa05100	Bacterial invasion of epithelial cells	1.99984	0.0265859	0.189646
hsa04360	Axon guidance	1.96627	0.0274824	0.191779
hsa05020	Prion diseases	2.77477	0.0282077	0.192652
hsa04926	Relaxin signaling pathway	1.91364	0.029231	0.195482
hsa04728	Dopaminergic synapse	1.83456	0.0310333	0.201154
hsa05133	Pertussis	2.14475	0.0313324	0.201154
hsa05165	Human papillomavirus infection	1.57854	0.0346012	0.217784
hsa04020	Calcium signaling pathway	1.93915	0.0407774	0.251722
hsa04371	Apelin signaling pathway	1.84985	0.0435909	0.264013
hsa05030	Cocaine addiction	2.25199	0.0451958	0.268664
hsa04380	Osteoclast differentiation	1.77079	0.0476929	0.269051
hsa00062	Fatty acid elongation	3.89442	0.0485634	0.269051
hsa00630	Glyoxylate and dicarboxylate metabolism	2.95976	0.0485634	0.269051
hsa05222	Small cell lung cancer	1.84985	0.0486135	0.269051
hsa00260	Glycine, serine and threonine metabolism	2.77477	0.0502728	0.273518
hsa05410	Hypertrophic cardiomyopathy (HCM)	2.11411	0.0525788	0.281297
hsa00052	Galactose metabolism	3.08308	0.0548114	0.288434
hsa05012	Parkinson disease	2.09417	0.056514	0.292596
hsa05146	Amoebiasis	1.91514	0.0587516	0.299354
hsa00590	Arachidonic acid metabolism	2.6309	0.0607189	0.304543
hsa04015	Rap1 signaling pathway	1.64431	0.0649282	0.310106
hsa00340	Histidine metabolism	3.28862	0.0656923	0.310106
hsa01040	Biosynthesis of unsaturated fatty acids	4.22822	0.0656923	0.310106
hsa04614	Renin-angiotensin system	2.95976	0.0656923	0.310106
hsa04727	GABAergic synapse	2.24224	0.0725395	0.337467
hsa04725	Cholinergic synapse	1.84985	0.0752873	0.345246
hsa00830	Retinol metabolism	2.95976	0.0811313	0.361849
hsa05170	Human immunodeficiency virus 1 infection	1.54154	0.0816247	0.361849
hsa04610	Complement and coagulation cascades	1.93028	0.0845245	0.361849
hsa04666	Fc gamma R-mediated phagocytosis	1.76176	0.0865276	0.361849
hsa05032	Morphine addiction	2.20877	0.0865276	0.361849
hsa05031	Amphetamine addiction	1.94082	0.0867987	0.361849
hsa05120	Epithelial cell signaling in Helicobacter pylori infection	1.82139	0.0867987	0.361849
hsa00500	Starch and sucrose metabolism	2.95976	0.0926216	0.381173
hsa00740	Riboflavin metabolism	4.22822	0.0973252	0.395461
hsa05204	Chemical carcinogenesis	2.33665	0.101064	0.395472
hsa04928	Parathyroid hormone synthesis, secretion and action	1.80874	0.102116	0.395472
hsa00520	Amino sugar and nucleotide sugar metabolism	2.06495	0.102812	0.395472
hsa00450	Selenocompound metabolism	3.6997	0.103036	0.395472
hsa04514	Cell adhesion molecules (CAMs)	1.77079	0.103488	0.395472
hsa04014	Ras signaling pathway	1.56957	0.104956	0.396365
hsa00330	Arginine and proline metabolism	2.01802	0.110852	0.402882
hsa04913	Ovarian steroidogenesis	2.61155	0.110852	0.402882
hsa05144	Malaria	2.11411	0.110852	0.402882
hsa05218	Melanoma	1.79379	0.111702	0.402882
hsa04713	Circadian entrainment	1.84985	0.113219	0.403816
hsa04310	Wnt signaling pathway	1.67083	0.117114	0.413117
hsa05132	Salmonella infection	1.68594	0.125781	0.425127
hsa05167	Kaposi sarcoma-associated herpesvirus infection	1.45422	0.125852	0.425127
hsa05202	Transcriptional misregulation in cancer	1.52472	0.125852	0.425127
hsa05163	Human cytomegalovirus infection	1.43678	0.126866	0.425127
hsa04611	Platelet activation	1.65968	0.127141	0.425127
hsa04932	Non-alcoholic fatty liver disease (NAFLD)	1.55777	0.13174	0.435964
hsa00770	Pantothenate and CoA biosynthesis	4.03603	0.133134	0.436082
hsa04724	Glutamatergic synapse	1.82906	0.147499	0.478253
hsa04144	Endocytosis	1.40622	0.151104	0.485044
hsa04625	C-type lectin receptor signaling pathway	1.59127	0.164396	0.522487
hsa04912	GnRH signaling pathway	1.75249	0.175931	0.553667
hsa05211	Renal cell carcinoma	1.59372	0.183416	0.571616
hsa00040	Pentose and glucuronate interconversions	3.28862	0.194778	0.601188
hsa04925	Aldosterone synthesis and secretion	1.75249	0.199853	0.607218
hsa04723	Retrograde endocannabinoid signaling	1.65848	0.200757	0.607218
hsa04662	B cell receptor signaling pathway	1.50133	0.202406	0.607218
hsa05416	Viral myocarditis	1.67533	0.206785	0.61461
hsa04911	Insulin secretion	1.76702	0.215132	0.633555
hsa04730	Long-term depression	1.67533	0.217693	0.635268
hsa05210	Colorectal cancer	1.39283	0.224297	0.648642
hsa04145	Phagosome	1.41459	0.227702	0.652612
hsa04213	Longevity regulating pathway - multiple species	1.55777	0.240064	0.681445
hsa00980	Metabolism of xenobiotics by cytochrome P450	1.99214	0.242456	0.681445
hsa00290	Valine, leucine and isoleucine biosynthesis	7.39939	0.244131	0.681445
hsa00790	Folate biosynthesis	2.01802	0.255362	0.706648
hsa04922	Glucagon signaling pathway	1.51351	0.260341	0.713468
hsa04970	Salivary secretion	1.94082	0.262272	0.713468
hsa04261	Adrenergic signaling in cardiomyocytes	1.47988	0.267252	0.720908
hsa00053	Ascorbate and aldarate metabolism	3.4151	0.27408	0.73237
hsa05166	Human T-cell leukemia virus 1 infection	1.25947	0.276065	0.73237
hsa04072	Phospholipase D signaling pathway	1.46765	0.282787	0.744054
hsa04657	IL-17 signaling pathway	1.49861	0.291919	0.760664
hsa00232	Caffeine metabolism	3.6997	0.295222	0.760664
hsa04062	Chemokine signaling pathway	1.4139	0.296458	0.760664
hsa04720	Long-term potentiation	1.47988	0.298578	0.760664
hsa04392	Hippo signaling pathway - multiple species	1.84985	0.311864	0.788254
hsa00860	Porphyrin and chlorophyll metabolism	2.36781	0.315085	0.790174
hsa04668	TNF signaling pathway	1.2565	0.325703	0.798457
hsa00480	Glutathione metabolism	1.57434	0.32738	0.798457
hsa04114	Oocyte meiosis	1.49483	0.328087	0.798457
hsa00030	Pentose phosphate pathway	1.70755	0.330825	0.798457
hsa00760	Nicotinate and nicotinamide metabolism	1.84985	0.330825	0.798457
hsa00750	Vitamin B6 metabolism	2.46646	0.342862	0.821334
hsa04976	Bile secretion	1.8121	0.347138	0.825417
hsa04370	VEGF signaling pathway	1.34534	0.368382	0.86949
hsa04660	T cell receptor signaling pathway	1.24621	0.374093	0.876526
hsa04918	Thyroid hormone synthesis	1.50496	0.384011	0.888037
hsa05142	Chagas disease (American trypanosomiasis)	1.24621	0.38454	0.888037
hsa00051	Fructose and mannose metabolism	1.64431	0.387435	0.888334
hsa04340	Hedgehog signaling pathway	1.47988	0.393469	0.891713
hsa04971	Gastric acid secretion	1.64431	0.39632	0.891713
hsa04218	Cellular senescence	1.16833	0.397243	0.891713
hsa04068	FoxO signaling pathway	1.16526	0.401483	0.894973
hsa04721	Synaptic vesicle cycle	1.34534	0.42304	0.930328
hsa04152	AMPK signaling pathway	1.1999	0.42314	0.930328
hsa04927	Cortisol synthesis and secretion	1.57434	0.436596	0.94472
hsa04210	Apoptosis	1.15616	0.438515	0.94472
hsa04915	Estrogen signaling pathway	1.34534	0.438515	0.94472
hsa04137	Mitophagy - animal	1.21302	0.450079	0.963169
hsa04960	Aldosterone-regulated sodium reabsorption	1.30578	0.460857	0.979702
hsa04972	Pancreatic secretion	1.41906	0.474327	1
hsa04914	Progesterone-mediated oocyte maturation	1.3281	0.507192	1
hsa00592	alpha-Linolenic acid metabolism	1.97317	0.511129	1
hsa05134	Legionellosis	1.09621	0.514774	1
hsa04919	Thyroid hormone signaling pathway	1.08615	0.528912	1
hsa00130	Ubiquinone and other terpenoid-quinone biosynthesis	1.64431	0.536932	1
hsa00430	Taurine and hypotaurine metabolism	2.11411	0.536932	1
hsa00601	Glycosphingolipid biosynthesis - lacto and neolacto series	1.47988	0.553112	1
hsa00562	Inositol phosphate metabolism	1.19345	0.566171	1
hsa05323	Rheumatoid arthritis	1.08284	0.573865	1
hsa05212	Pancreatic cancer	0.986586	0.578303	1
hsa04962	Vasopressin-regulated water reabsorption	1.10991	0.578813	1
hsa04931	Insulin resistance	1.06795	0.590865	1
hsa03450	Non-homologous end-joining	1.23323	0.597446	1
hsa00561	Glycerolipid metabolism	1.40941	0.597868	1
hsa04930	Type II diabetes mellitus	1.00901	0.609393	1
hsa05010	Alzheimer disease	1.21483	0.611612	1
hsa00565	Ether lipid metabolism	1.64431	0.624115	1
hsa04961	Endocrine and other factor-regulated calcium reabsorption	1.03247	0.624115	1
hsa00533	Glycosaminoglycan biosynthesis - keratan sulfate	1.23323	0.624672	1
hsa00512	Mucin type O-glycan biosynthesis	1.64431	0.629196	1
hsa04710	Circadian rhythm	0.986586	0.629196	1
hsa05161	Hepatitis B	0.965138	0.644254	1
hsa04136	Autophagy - other	1.02061	0.646566	1
hsa05215	Prostate cancer	0.965138	0.647413	1
hsa05131	Shigellosis	0.970412	0.64826	1
hsa05230	Central carbon metabolism in cancer	0.986586	0.64826	1
hsa05145	Toxoplasmosis	0.977278	0.648624	1
hsa00603	Glycosphingolipid biosynthesis - globo and isoglobo series	1.34534	0.650058	1
hsa00730	Thiamine metabolism	1.23323	0.650058	1
hsa04630	JAK-STAT signaling pathway	1.04956	0.662376	1
hsa04215	Apoptosis - multiple species	0.924924	0.663284	1
hsa04070	Phosphatidylinositol signaling system	1.08284	0.666949	1
hsa05231	Choline metabolism in cancer	1.12396	0.666949	1
hsa04650	Natural killer cell mediated cytotoxicity	1.0477	0.667364	1
hsa04066	HIF-1 signaling pathway	0.965138	0.676457	1
hsa05034	Alcoholism	1.19696	0.678754	1
hsa04978	Mineral absorption	1.38739	0.679131	1
hsa04916	Melanogenesis	1.09621	0.685789	1
hsa04714	Thermogenesis	1.20455	0.690129	1
hsa04071	Sphingolipid signaling pathway	1.03592	0.692881	1
hsa04920	Adipocytokine signaling pathway	0.95476	0.69428	1
hsa00250	Alanine, aspartate and glutamate metabolism	0.95476	0.694802	1
hsa00120	Primary bile acid biosynthesis	1.13837	0.6958	1
hsa04722	Neurotrophin signaling pathway	0.908697	0.701285	1
hsa05168	Herpes simplex infection	0.940963	0.712938	1
hsa04910	Insulin signaling pathway	0.947122	0.715283	1
hsa04390	Hippo signaling pathway	0.986586	0.721034	1
hsa04934	Cushing syndrome	1.07411	0.721034	1
hsa04115	p53 signaling pathway	0.870517	0.725864	1
hsa04211	Longevity regulating pathway	0.902365	0.727007	1
hsa04142	Lysosome	0.959181	0.733366	1
hsa00531	Glycosaminoglycan degradation	1.13837	0.735569	1
hsa05150	Staphylococcus aureus infection	0.924924	0.739192	1
hsa05140	Leishmaniasis	0.857901	0.74553	1
hsa04658	Th1 and Th2 cell differentiation	0.870517	0.753377	1
hsa00532	Glycosaminoglycan biosynthesis - chondroitin sulfate / dermatan sulfate	1.23323	0.75346	1
hsa00670	One carbon pool by folate	0.924924	0.75346	1
hsa05016	Huntington disease	1.07806	0.762637	1
hsa04216	Ferroptosis	0.896896	0.76299	1
hsa04140	Autophagy - animal	0.842207	0.769994	1
hsa03440	Homologous recombination	0.799934	0.774927	1
hsa00140	Steroid hormone biosynthesis	1.23323	0.780526	1
hsa04260	Cardiac muscle contraction	1.00331	0.781599	1
hsa05224	Breast cancer	0.924924	0.78446	1
hsa00514	Other types of O-glycan biosynthesis	1.05706	0.785697	1
hsa00983	Drug metabolism - other enzymes	1.03851	0.789954	1
hsa05160	Hepatitis C	0.877894	0.79013	1
hsa00564	Glycerophospholipid metabolism	1.21302	0.793019	1
hsa00515	Mannose type O-glycan biosynthesis	1.23323	0.8002	1
hsa03430	Mismatch repair	0.643426	0.8002	1
hsa04964	Proximal tubule bicarbonate reclamation	0.778884	0.8002	1
hsa04150	mTOR signaling pathway	0.876965	0.8026	1
hsa05203	Viral carcinogenesis	0.909423	0.806062	1
hsa04750	Inflammatory mediator regulation of TRP channels	0.924924	0.807411	1
hsa04973	Carbohydrate digestion and absorption	1.02061	0.807632	1
hsa04621	NOD-like receptor signaling pathway	0.899926	0.808719	1
hsa04977	Vitamin digestion and absorption	0.924924	0.813722	1
hsa04742	Taste transduction	1.31545	0.820836	1
hsa00563	Glycosylphosphatidylinositol (GPI)-anchor biosynthesis	0.986586	0.82633	1
hsa05221	Acute myeloid leukemia	0.693693	0.832257	1
hsa00230	Purine metabolism	1.04054	0.834455	1
hsa04950	Maturity onset diabetes of the young	0.616616	0.838086	1
hsa04330	Notch signaling pathway	0.672672	0.844625	1
hsa04672	Intestinal immune network for IgA production	0.739939	0.844625	1
hsa04080	Neuroactive ligand-receptor interaction	1.14424	0.846715	1
hsa04664	Fc epsilon RI signaling pathway	0.704704	0.847004	1
hsa04966	Collecting duct acid secretion	0.643426	0.849046	1
hsa04659	Th17 cell differentiation	0.739939	0.857159	1
hsa04979	Cholesterol metabolism	0.657724	0.86059	1
hsa05110	Vibrio cholerae infection	0.704704	0.86059	1
hsa04917	Prolactin signaling pathway	0.643426	0.860611	1
hsa05206	MicroRNAs in cancer	1.65581	0.865199	1
hsa05214	Glioma	0.652888	0.867008	1
hsa00591	Linoleic acid metabolism	0.778884	0.868794	1
hsa05226	Gastric cancer	0.803035	0.883947	1
hsa05225	Hepatocellular carcinoma	0.778884	0.888	1
hsa00190	Oxidative phosphorylation	0.944603	0.892973	1
hsa05164	Influenza A	0.754078	0.898715	1
hsa04640	Hematopoietic cell lineage	0.688316	0.900747	1
hsa03410	Base excision repair	0.448448	0.900882	1
hsa05143	African trypanosomiasis	0.448448	0.913854	1
hsa04550	Signaling pathways regulating pluripotency of stem cells	0.739939	0.914802	1
hsa05216	Thyroid cancer	0.411077	0.925129	1
hsa04620	Toll-like receptor signaling pathway	0.643426	0.927396	1
hsa04350	TGF-beta signaling pathway	0.608169	0.929369	1
hsa05217	Basal cell carcinoma	0.580345	0.932601	1
hsa04012	ErbB signaling pathway	0.548103	0.932829	1
hsa04975	Fat digestion and absorption	0.548103	0.943449	1
hsa05219	Bladder cancer	0.360946	0.943449	1
hsa05162	Measles	0.596725	0.948867	1
hsa03015	mRNA surveillance pathway	0.541419	0.950504	1
hsa05322	Systemic lupus erythematosus	0.84084	0.95105	1
hsa02010	ABC transporters	0.493293	0.954185	1
hsa04622	RIG-I-like receptor signaling pathway	0.469803	0.955016	1
hsa03022	Basal transcription factors	0.328862	0.95729	1
hsa04064	NF-kappa B signaling pathway	0.493293	0.959767	1
hsa05152	Tuberculosis	0.647447	0.962373	1
hsa00600	Sphingolipid metabolism	0.616616	0.962884	1
hsa05169	Epstein-Barr virus infection	0.619844	0.965919	1
hsa04141	Protein processing in endoplasmic reticulum	0.616616	0.970601	1
hsa04110	Cell cycle	0.485206	0.971783	1
hsa03018	RNA degradation	0.448448	0.973531	1
hsa03460	Fanconi anemia pathway	0.302016	0.977295	1
hsa04060	Cytokine-cytokine receptor interaction	0.789269	0.981352	1
hsa05213	Endometrial cancer	0.259628	0.982857	1
hsa04623	Cytosolic DNA-sensing pathway	0.274052	0.987935	1
hsa05321	Inflammatory bowel disease (IBD)	0.259628	0.989517	1
hsa00970	Aminoacyl-tRNA biosynthesis	0.399967	0.990229	1
hsa00240	Pyrimidine metabolism	0.344158	0.993032	1
hsa05220	Chronic myeloid leukemia	0.194721	0.995163	1
hsa04612	Antigen processing and presentation	0.234901	0.995492	1
hsa04120	Ubiquitin mediated proteolysis	0.333807	0.996004	1
hsa04217	Necroptosis	0.319398	0.999071	1
hsa03013	RNA transport	0.202723	0.99992	1
hsa03010	Ribosome	0.11839	0.999979	1
hsa04740	Olfactory transduction	1.64431	1	1
hsa00061	Fatty acid biosynthesis	0	1	1
hsa00100	Steroid biosynthesis	0	1	1
hsa00220	Arginine biosynthesis	0	1	1
hsa00400	Phenylalanine, tyrosine and tryptophan biosynthesis	0	1	1
hsa00440	Phosphonate and phosphinate metabolism	0	1	1
hsa00471	D-Glutamine and D-glutamate metabolism	0	1	1
hsa00472	D-Arginine and D-ornithine metabolism	0	1	1
hsa00510	N-Glycan biosynthesis	0	1	1
hsa00511	Other glycan degradation	0	1	1
hsa00524	Neomycin, kanamycin and gentamicin biosynthesis	0	1	1
hsa00534	Glycosaminoglycan biosynthesis - heparan sulfate / heparin	0	1	1
hsa00604	Glycosphingolipid biosynthesis - ganglio series	0	1	1
hsa00780	Biotin metabolism	0	1	1
hsa00785	Lipoic acid metabolism	0	1	1
hsa00910	Nitrogen metabolism	0	1	1
hsa03008	Ribosome biogenesis in eukaryotes	0	1	1
hsa03020	RNA polymerase	0	1	1
hsa03030	DNA replication	0	1	1
hsa03040	Spliceosome	0	1	1
hsa03050	Proteasome	0	1	1
hsa03060	Protein export	0	1	1
hsa03420	Nucleotide excision repair	0	1	1
hsa04122	Sulfur relay system	0	1	1
hsa04130	SNARE interactions in vesicular transport	0	1	1
hsa04744	Phototransduction	0	1	1
hsa04940	Type I diabetes mellitus	0	1	1
hsa05033	Nicotine addiction	0	1	1
hsa05223	Non-small cell lung cancer	0	1	1
hsa05310	Asthma	0	1	1
hsa05320	Autoimmune thyroid disease	0	1	1
hsa05330	Allograft rejection	0	1	1
hsa05332	Graft-versus-host disease	0	1	1
hsa05340	Primary immunodeficiency	0	1	1

## Sheet: PIN DEGs - PCa
ID	Pathway	Fold_Enrichment	p_value	adj_p
hsa04270	Vascular smooth muscle contraction	3.65443	4.58042e-05	0.0127226
hsa05414	Dilated cardiomyopathy (DCM)	3.61383	0.000106675	0.0127226
hsa04022	cGMP-PKG signaling pathway	2.81226	0.000160055	0.0127226
hsa04510	Focal adhesion	2.37538	0.000220692	0.0127226
hsa05205	Proteoglycans in cancer	2.2855	0.00025911	0.0127226
hsa04392	Hippo signaling pathway - multiple species	5.42074	0.00026664	0.0127226
hsa04810	Regulation of actin cytoskeleton	2.31095	0.000277439	0.0127226
hsa05410	Hypertrophic cardiomyopathy (HCM)	3.25244	0.000495748	0.0198919
hsa04928	Parathyroid hormone synthesis, secretion and action	2.71037	0.00205035	0.0687012
hsa04925	Aldosterone synthesis and secretion	2.99567	0.00214022	0.0687012
hsa04921	Oxytocin signaling pathway	2.55357	0.00248481	0.0725114
hsa04390	Hippo signaling pathway	2.28876	0.00288423	0.0771531
hsa04911	Insulin secretion	2.91264	0.00563554	0.126192
hsa04713	Circadian entrainment	2.64261	0.00579593	0.126192
hsa04971	Gastric acid secretion	3.31267	0.00589682	0.126192
hsa04015	Rap1 signaling pathway	1.9876	0.00817895	0.16409
hsa04916	Melanogenesis	2.60999	0.00885087	0.167125
hsa04730	Long-term depression	2.76151	0.0105647	0.175639
hsa00780	Biotin metabolism	10.8415	0.0108685	0.175639
hsa04024	cAMP signaling pathway	2.13442	0.0109433	0.175639
hsa04728	Dopaminergic synapse	2.01598	0.0146351	0.221056
hsa04261	Adrenergic signaling in cardiomyocytes	2.1683	0.0156054	0.221056
hsa04927	Cortisol synthesis and secretion	3.11404	0.0158389	0.221056
hsa04540	Gap junction	2.32317	0.0187753	0.241724
hsa04611	Platelet activation	2.12777	0.0188259	0.241724
hsa04725	Cholinergic synapse	2.20218	0.0199289	0.246045
hsa04371	Apelin signaling pathway	2.03278	0.0212297	0.252397
hsa05032	Morphine addiction	2.66992	0.0235408	0.262811
hsa04340	Hedgehog signaling pathway	2.84589	0.023743	0.262811
hsa04934	Cushing syndrome	2.09835	0.0275475	0.294758
hsa00670	One carbon pool by folate	4.06556	0.0312419	0.318797
hsa05412	Arrhythmogenic right ventricular cardiomyopathy (ARVC)	2.52345	0.0317803	0.318797
hsa04020	Calcium signaling pathway	2.01876	0.0328963	0.319991
hsa04310	Wnt signaling pathway	1.9672	0.0350263	0.33069
hsa04360	Axon guidance	1.93327	0.0413201	0.371815
hsa00061	Fatty acid biosynthesis	5.42074	0.0416989	0.371815
hsa04970	Salivary secretion	2.66594	0.0492711	0.42746
hsa04912	GnRH signaling pathway	2.13977	0.0592011	0.500094
hsa04512	ECM-receptor interaction	2.21758	0.0640927	0.515925
hsa04931	Insulin resistance	1.84417	0.0643894	0.515925
hsa04961	Endocrine and other factor-regulated calcium reabsorption	2.26915	0.0666656	0.515925
hsa04218	Cellular senescence	1.60482	0.0678565	0.515925
hsa00982	Drug metabolism - cytochrome P450	2.76804	0.0691115	0.515925
hsa04144	Endocytosis	1.54528	0.0748332	0.541673
hsa05030	Cocaine addiction	2.12116	0.0784532	0.541673
hsa04070	Phosphatidylinositol signaling system	1.9832	0.082745	0.541673
hsa04750	Inflammatory mediator regulation of TRP channels	2.03278	0.082745	0.541673
hsa04933	AGE-RAGE signaling pathway in diabetic complications	1.76763	0.082745	0.541673
hsa04918	Thyroid hormone synthesis	2.20505	0.0836685	0.541673
hsa04979	Cholesterol metabolism	2.1683	0.0847586	0.541673
hsa05418	Fluid shear stress and atherosclerosis	1.61381	0.0860602	0.541673
hsa04140	Autophagy - animal	1.58656	0.095061	0.586819
hsa04919	Thyroid hormone signaling pathway	1.64114	0.100526	0.608845
hsa04924	Renin secretion	2.23207	0.103212	0.613538
hsa00230	Purine metabolism	1.90573	0.112629	0.657343
hsa04720	Long-term potentiation	1.89726	0.116395	0.667192
hsa00480	Glutathione metabolism	2.07603	0.128147	0.698301
hsa04920	Adipocytokine signaling pathway	1.83606	0.130409	0.698301
hsa05204	Chemical carcinogenesis	2.28242	0.130551	0.698301
hsa04962	Vasopressin-regulated water reabsorption	2.03278	0.131377	0.698301
hsa04972	Pancreatic secretion	2.00493	0.135501	0.698301
hsa05146	Amoebiasis	1.72188	0.135501	0.698301
hsa04910	Insulin signaling pathway	1.56117	0.13705	0.698301
hsa04151	PI3K-Akt signaling pathway	1.3939	0.145089	0.727711
hsa04012	ErbB signaling pathway	1.60615	0.151013	0.743724
hsa04520	Adherens junction	1.72478	0.152915	0.743724
hsa00250	Alanine, aspartate and glutamate metabolism	2.09835	0.165773	0.794227
hsa04926	Relaxin signaling pathway	1.54211	0.176188	0.828351
hsa00350	Tyrosine metabolism	2.1683	0.178057	0.828351
hsa04922	Glucagon signaling pathway	1.66318	0.182216	0.835592
hsa04068	FoxO signaling pathway	1.40854	0.188778	0.853489
hsa04723	Retrograde endocannabinoid signaling	1.6823	0.199803	0.890789
hsa04152	AMPK signaling pathway	1.46507	0.20329	0.893919
hsa00983	Drug metabolism - other enzymes	1.99712	0.211612	0.91794
hsa05200	Pathways in cancer	1.2775	0.218111	0.932729
hsa00601	Glycosphingolipid biosynthesis - lacto and neolacto series	2.43933	0.229257	0.932729
hsa04216	Ferroptosis	1.97118	0.229887	0.932729
hsa00603	Glycosphingolipid biosynthesis - globo and isoglobo series	2.95677	0.234639	0.932729
hsa05031	Amphetamine addiction	1.59956	0.239142	0.932729
hsa05215	Prostate cancer	1.41411	0.246058	0.932729
hsa04530	Tight junction	1.42844	0.247147	0.932729
hsa04670	Leukocyte transendothelial migration	1.49347	0.251085	0.932729
hsa05145	Toxoplasmosis	1.38075	0.259235	0.932729
hsa04724	Glutamatergic synapse	1.64449	0.267467	0.932729
hsa04726	Serotonergic synapse	1.52458	0.267467	0.932729
hsa04976	Bile secretion	1.99129	0.27057	0.932729
hsa05161	Hepatitis B	1.29626	0.271896	0.932729
hsa00232	Caffeine metabolism	4.06556	0.271935	0.932729
hsa00524	Neomycin, kanamycin and gentamicin biosynthesis	4.06556	0.271935	0.932729
hsa00020	Citrate cycle (TCA cycle)	1.74238	0.279888	0.932729
hsa00630	Glyoxylate and dicarboxylate metabolism	1.95147	0.279888	0.932729
hsa00240	Pyrimidine metabolism	1.51276	0.28141	0.932729
hsa00071	Fatty acid degradation	1.62622	0.284858	0.932729
hsa04973	Carbohydrate digestion and absorption	2.24307	0.284858	0.932729
hsa05142	Chagas disease (American trypanosomiasis)	1.36945	0.290455	0.932729
hsa05416	Viral myocarditis	1.53417	0.296388	0.932729
hsa03020	RNA polymerase	1.74238	0.297012	0.932729
hsa04710	Circadian rhythm	1.62622	0.297012	0.932729
hsa04071	Sphingolipid signaling pathway	1.4636	0.301128	0.932729
hsa03320	PPAR signaling pathway	1.54878	0.302925	0.932729
hsa05140	Leishmaniasis	1.41411	0.302925	0.932729
hsa05166	Human T-cell leukemia virus 1 infection	1.24562	0.306101	0.932729
hsa04211	Longevity regulating pathway	1.38824	0.306686	0.932729
hsa04625	C-type lectin receptor signaling pathway	1.3989	0.308749	0.932729
hsa05163	Human cytomegalovirus infection	1.26309	0.309838	0.932729
hsa00980	Metabolism of xenobiotics by cytochrome P450	1.87641	0.313868	0.932729
hsa04136	Autophagy - other	1.6823	0.314193	0.932729
hsa00440	Phosphonate and phosphinate metabolism	4.06556	0.316721	0.932729
hsa00750	Vitamin B6 metabolism	2.71037	0.316721	0.932729
hsa04915	Estrogen signaling pathway	1.47838	0.326184	0.934779
hsa00565	Ether lipid metabolism	2.40922	0.327237	0.934779
hsa00051	Fructose and mannose metabolism	1.80691	0.331394	0.934779
hsa04213	Longevity regulating pathway - multiple species	1.42651	0.333239	0.934779
hsa03010	Ribosome	1.43108	0.340554	0.934779
hsa00280	Valine, leucine and isoleucine degradation	1.54878	0.341464	0.934779
hsa00520	Amino sugar and nucleotide sugar metabolism	1.51276	0.341464	0.934779
hsa05217	Basal cell carcinoma	1.59434	0.345624	0.934779
hsa04260	Cardiac muscle contraction	1.65379	0.347027	0.934779
hsa04130	SNARE interactions in vesicular transport	1.52458	0.348579	0.934779
hsa00532	Glycosaminoglycan biosynthesis - chondroitin sulfate / dermatan sulfate	2.71037	0.350737	0.934779
hsa04014	Ras signaling pathway	1.31412	0.354125	0.934779
hsa05144	Malaria	1.54878	0.355708	0.934779
hsa04010	MAPK signaling pathway	1.23199	0.358186	0.934779
hsa04137	Mitophagy - animal	1.33297	0.370462	0.951346
hsa05321	Inflammatory bowel disease (IBD)	1.42651	0.370462	0.951346
hsa04062	Chemokine signaling pathway	1.34655	0.379132	0.965884
hsa04217	Necroptosis	1.28694	0.411904	1
hsa04350	TGF-beta signaling pathway	1.33662	0.413956	1
hsa05160	Hepatitis C	1.24034	0.415395	1
hsa00340	Histidine metabolism	1.80691	0.417696	1
hsa05211	Renal cell carcinoma	1.25094	0.42006	1
hsa03460	Fanconi anemia pathway	1.32753	0.426523	1
hsa04923	Regulation of lipolysis in adipocytes	1.41411	0.426523	1
hsa05132	Salmonella infection	1.23511	0.436178	1
hsa05210	Colorectal cancer	1.14792	0.436178	1
hsa04977	Vitamin digestion and absorption	2.03278	0.439244	1
hsa00380	Tryptophan metabolism	1.47838	0.449704	1
hsa04727	GABAergic synapse	1.47838	0.458245	1
hsa04621	NOD-like receptor signaling pathway	1.20868	0.459744	1
hsa05225	Hepatocellular carcinoma	1.17687	0.459744	1
hsa03440	Homologous recombination	1.31856	0.465991	1
hsa00072	Synthesis and degradation of ketone bodies	1.80691	0.469981	1
hsa05202	Transcriptional misregulation in cancer	1.18271	0.474744	1
hsa00562	Inositol phosphate metabolism	1.31147	0.480969	1
hsa05100	Bacterial invasion of epithelial cells	1.0988	0.480969	1
hsa03013	RNA transport	1.22524	0.483487	1
hsa04550	Signaling pathways regulating pluripotency of stem cells	1.21967	0.486109	1
hsa04110	Cell cycle	1.06638	0.496831	1
hsa04114	Oocyte meiosis	1.31412	0.496831	1
hsa05133	Pertussis	1.17842	0.504738	1
hsa05165	Human papillomavirus infection	1.13836	0.518794	1
hsa04514	Cell adhesion molecules (CAMs)	1.25094	0.520724	1
hsa00650	Butanoate metabolism	1.47838	0.520742	1
hsa04744	Phototransduction	2.1683	0.520742	1
hsa05016	Huntington disease	1.29236	0.527058	1
hsa04930	Type II diabetes mellitus	1.10879	0.543867	1
hsa05170	Human immunodeficiency virus 1 infection	1.10109	0.545314	1
hsa00062	Fatty acid elongation	1.71181	0.558413	1
hsa00760	Nicotinate and nicotinamide metabolism	1.35519	0.558413	1
hsa05131	Shigellosis	1.06638	0.572565	1
hsa05230	Central carbon metabolism in cancer	1.08415	0.572565	1
hsa04914	Progesterone-mediated oocyte maturation	1.25094	0.574358	1
hsa00410	beta-Alanine metabolism	1.20461	0.576441	1
hsa00970	Aminoacyl-tRNA biosynthesis	1.75808	0.584802	1
hsa05221	Acute myeloid leukemia	1.01639	0.584802	1
hsa00330	Arginine and proline metabolism	1.10879	0.587294	1
hsa04913	Ovarian steroidogenesis	1.4349	0.587294	1
hsa00640	Propanoate metabolism	1.20461	0.593924	1
hsa03008	Ribosome biogenesis in eukaryotes	1.4349	0.594144	1
hsa04145	Phagosome	1.07618	0.595375	1
hsa00830	Retinol metabolism	1.62622	0.596833	1
hsa04215	Apoptosis - multiple species	1.01639	0.610861	1
hsa00604	Glycosphingolipid biosynthesis - ganglio series	1.35519	0.614198	1
hsa00040	Pentose and glucuronate interconversions	1.80691	0.627254	1
hsa04917	Prolactin signaling pathway	0.942738	0.631647	1
hsa04142	Lysosome	1.05403	0.638082	1
hsa05214	Glioma	0.956601	0.642812	1
hsa05020	Prion diseases	1.01639	0.643105	1
hsa05143	African trypanosomiasis	0.985589	0.643105	1
hsa00500	Starch and sucrose metabolism	1.30098	0.658418	1
hsa00120	Primary bile acid biosynthesis	1.25094	0.660234	1
hsa00360	Phenylalanine metabolism	1.08415	0.660234	1
hsa00450	Selenocompound metabolism	1.35519	0.660234	1
hsa00910	Nitrogen metabolism	1.25094	0.660234	1
hsa03015	mRNA surveillance pathway	0.991599	0.665658	1
hsa04666	Fc gamma R-mediated phagocytosis	0.967989	0.665658	1
hsa05130	Pathogenic Escherichia coli infection	0.903457	0.665809	1
hsa04380	Osteoclast differentiation	0.972953	0.671178	1
hsa04960	Aldosterone-regulated sodium reabsorption	0.956601	0.6732	1
hsa05216	Thyroid cancer	0.903457	0.6732	1
hsa05340	Primary immunodeficiency	0.956601	0.6732	1
hsa04658	Th1 and Th2 cell differentiation	0.956601	0.675082	1
hsa04072	Phospholipase D signaling pathway	1.07519	0.682076	1
hsa04657	IL-17 signaling pathway	1.02925	0.684328	1
hsa05212	Pancreatic cancer	0.867319	0.685208	1
hsa04141	Protein processing in endoplasmic reticulum	1.01639	0.692192	1
hsa05213	Endometrial cancer	0.855906	0.700757	1
hsa00100	Steroid biosynthesis	1.47838	0.700782	1
hsa00531	Glycosaminoglycan degradation	1.25094	0.700782	1
hsa05226	Gastric cancer	1.00851	0.703775	1
hsa04150	mTOR signaling pathway	0.963687	0.71079	1
hsa05167	Kaposi sarcoma-associated herpesvirus infection	0.940013	0.7143	1
hsa00260	Glycine, serine and threonine metabolism	1.01639	0.714438	1
hsa05164	Influenza A	0.932229	0.731632	1
hsa05231	Choline metabolism in cancer	1.02925	0.736027	1
hsa00860	Porphyrin and chlorophyll metabolism	1.30098	0.739435	1
hsa04066	HIF-1 signaling pathway	0.883816	0.744012	1
hsa04722	Neurotrophin signaling pathway	0.855906	0.747619	1
hsa04940	Type I diabetes mellitus	0.855906	0.751217	1
hsa00514	Other types of O-glycan biosynthesis	1.16159	0.752723	1
hsa04146	Peroxisome	0.985589	0.759001	1
hsa03430	Mismatch repair	0.707053	0.767951	1
hsa04614	Renin-angiotensin system	0.813111	0.767951	1
hsa04964	Proximal tubule bicarbonate reclamation	0.855906	0.767951	1
hsa03022	Basal transcription factors	0.722765	0.773408	1
hsa04620	Toll-like receptor signaling pathway	0.883816	0.774168	1
hsa05012	Parkinson disease	1.07392	0.7776	1
hsa05152	Tuberculosis	0.91475	0.778718	1
hsa05223	Non-small cell lung cancer	0.739192	0.780229	1
hsa05034	Alcoholism	1.07618	0.78416	1
hsa04630	JAK-STAT signaling pathway	0.922679	0.786344	1
hsa00270	Cysteine and methionine metabolism	0.813111	0.793851	1
hsa03420	Nucleotide excision repair	0.707053	0.793851	1
hsa04659	Th17 cell differentiation	0.813111	0.794944	1
hsa00010	Glycolysis / Gluconeogenesis	0.813111	0.797142	1
hsa05224	Breast cancer	0.88934	0.806773	1
hsa00790	Folate biosynthesis	0.739192	0.808243	1
hsa05168	Herpes simplex infection	0.846012	0.809911	1
hsa04974	Protein digestion and absorption	1.18271	0.81192	1
hsa00510	N-Glycan biosynthesis	1.16159	0.812646	1
hsa04115	p53 signaling pathway	0.717451	0.827706	1
hsa05218	Melanoma	0.739192	0.827706	1
hsa04978	Mineral absorption	1.01639	0.829896	1
hsa05222	Small cell lung cancer	0.739192	0.8315	1
hsa04210	Apoptosis	0.762292	0.849427	1
hsa05220	Chronic myeloid leukemia	0.64193	0.854239	1
hsa00564	Glycerophospholipid metabolism	1.06638	0.854938	1
hsa00052	Galactose metabolism	0.677593	0.86047	1
hsa00512	Mucin type O-glycan biosynthesis	0.903457	0.86047	1
hsa05310	Asthma	0.707053	0.86047	1
hsa04610	Complement and coagulation cascades	0.707053	0.871728	1
hsa03410	Base excision repair	0.492795	0.877137	1
hsa04370	VEGF signaling pathway	0.591354	0.88542	1
hsa00561	Glycerolipid metabolism	0.774392	0.896401	1
hsa03030	DNA replication	0.464635	0.898483	1
hsa04714	Thermogenesis	0.945478	0.903486	1
hsa04623	Cytosolic DNA-sensing pathway	0.602305	0.906396	1
hsa05330	Allograft rejection	0.508194	0.910614	1
hsa04668	TNF signaling pathway	0.613669	0.912853	1
hsa05162	Measles	0.655735	0.914742	1
hsa00620	Pyruvate metabolism	0.478301	0.916125	1
hsa04975	Fat digestion and absorption	0.602305	0.926149	1
hsa04664	Fc epsilon RI signaling pathway	0.516261	0.927573	1
hsa05120	Epithelial cell signaling in Helicobacter pylori infection	0.500376	0.927573	1
hsa04120	Ubiquitin mediated proteolysis	0.611362	0.929445	1
hsa05206	MicroRNAs in cancer	1.47838	0.930064	1
hsa05169	Epstein-Barr virus infection	0.68114	0.932625	1
hsa04622	RIG-I-like receptor signaling pathway	0.516261	0.934706	1
hsa04064	NF-kappa B signaling pathway	0.542074	0.937045	1
hsa04662	B cell receptor signaling pathway	0.471369	0.938017	1
hsa02010	ABC transporters	0.542074	0.938987	1
hsa03050	Proteasome	0.378191	0.94275	1
hsa04660	T cell receptor signaling pathway	0.513544	0.952332	1
hsa04330	Notch signaling pathway	0.369596	0.952704	1
hsa04672	Intestinal immune network for IgA production	0.406556	0.952704	1
hsa05010	Alzheimer disease	0.728159	0.95586	1
hsa05110	Vibrio cholerae infection	0.387196	0.95836	1
hsa03018	RNA degradation	0.492795	0.959321	1
hsa05014	Amyotrophic lateral sclerosis (ALS)	0.325244	0.96093	1
hsa05320	Autoimmune thyroid disease	0.39664	0.965603	1
hsa04742	Taste transduction	0.722765	0.96714	1
hsa05203	Viral carcinogenesis	0.635953	0.967545	1
hsa05134	Legionellosis	0.301152	0.969718	1
hsa05150	Staphylococcus aureus infection	0.338796	0.971587	1
hsa00310	Lysine degradation	0.338796	0.976531	1
hsa05323	Rheumatoid arthritis	0.39664	0.977475	1
hsa00140	Steroid hormone biosynthesis	0.451728	0.97798	1
hsa00590	Arachidonic acid metabolism	0.361383	0.981812	1
hsa04721	Synaptic vesicle cycle	0.295677	0.981812	1
hsa04932	Non-alcoholic fatty liver disease (NAFLD)	0.489089	0.983955	1
hsa04060	Cytokine-cytokine receptor interaction	0.722765	0.988082	1
hsa03040	Spliceosome	0.384147	0.990496	1
hsa04650	Natural killer cell mediated cytotoxicity	0.287827	0.99772	1
hsa04640	Hematopoietic cell lineage	0.189096	0.997923	1
hsa05322	Systemic lupus erythematosus	0.369596	0.997967	1
hsa04080	Neuroactive ligand-receptor interaction	0.586781	0.998529	1
hsa00190	Oxidative phosphorylation	0.173002	0.999792	1
hsa04740	Olfactory transduction	2.71037	1	1
hsa00030	Pentose phosphate pathway	0	1	1
hsa00053	Ascorbate and aldarate metabolism	0	1	1
hsa00130	Ubiquinone and other terpenoid-quinone biosynthesis	0	1	1
hsa00220	Arginine biosynthesis	0	1	1
hsa00290	Valine, leucine and isoleucine biosynthesis	0	1	1
hsa00400	Phenylalanine, tyrosine and tryptophan biosynthesis	0	1	1
hsa00430	Taurine and hypotaurine metabolism	0	1	1
hsa00471	D-Glutamine and D-glutamate metabolism	0	1	1
hsa00472	D-Arginine and D-ornithine metabolism	0	1	1
hsa00511	Other glycan degradation	0	1	1
hsa00515	Mannose type O-glycan biosynthesis	0	1	1
hsa00533	Glycosaminoglycan biosynthesis - keratan sulfate	0	1	1
hsa00534	Glycosaminoglycan biosynthesis - heparan sulfate / heparin	0	1	1
hsa00563	Glycosylphosphatidylinositol (GPI)-anchor biosynthesis	0	1	1
hsa00591	Linoleic acid metabolism	0	1	1
hsa00592	alpha-Linolenic acid metabolism	0	1	1
hsa00600	Sphingolipid metabolism	0	1	1
hsa00730	Thiamine metabolism	0	1	1
hsa00740	Riboflavin metabolism	0	1	1
hsa00770	Pantothenate and CoA biosynthesis	0	1	1
hsa00785	Lipoic acid metabolism	0	1	1
hsa00900	Terpenoid backbone biosynthesis	0	1	1
hsa00920	Sulfur metabolism	0	1	1
hsa01040	Biosynthesis of unsaturated fatty acids	0	1	1
hsa03060	Protein export	0	1	1
hsa03450	Non-homologous end-joining	0	1	1
hsa04122	Sulfur relay system	0	1	1
hsa04612	Antigen processing and presentation	0	1	1
hsa04950	Maturity onset diabetes of the young	0	1	1
hsa04966	Collecting duct acid secretion	0	1	1
hsa05033	Nicotine addiction	0	1	1
hsa05219	Bladder cancer	0	1	1
hsa05332	Graft-versus-host disease	0	1	1
